# Supplementary material for: Chemical Constituents of the Marine-Derived Fungus Aspergillus sp. SCS-KFD66
Source: PubMed Central journal article supplement (PMC6316597; doi:10.3390/md16120468), 2018-11-26

# Chemical Constituents of the Marine-Derived Fungus *Aspergillus* sp. SCS-KFD66

Chang-Liang An <sup>1,2,†</sup>, Fan-Dong Kong <sup>1,†</sup>, Qing-Yun Ma <sup>1</sup>, Qing-Yi Xie <sup>1</sup>, Jing-Zhe Yuan <sup>1</sup>, Li-Man Zhou<sup>1</sup>, Hao-Fu Dai <sup>1</sup>, Zhi-Fang Yu <sup>2,\*</sup>, and You-Xing Zhao <sup>1,\*</sup>

<sup>1</sup> Hainan Key Laboratory for Research and Development of Natural Product from Li Folk Medicine, Institute of Tropical Bioscience and Biotechnology, Chinese Academy of Tropical Agricultural Sciences, Haikou 571101, China; annncl@163.com (C.A.); kongfandong@itbb.org.cn (F.K.); maqingyun@itbb.org.cn (Q.M.); xieqingyi@itbb.org.cn (Q.X.); jingzhe1989@yahoo.com (J.Y.); zhouliman88@126.com (L.Z.); daihaofu@itbb.org.cn (H.D.)

<sup>2</sup> College of Food Science and Technology, Nanjing Agricultural University, Nanjing 210095, China

\* Correspondence: yuzhifang@njau.edu.cn (Z.Y.); zhaoyouxing@itbb.org.cn (Y.Z.); Tel.: +86-139-5169-2350 (Z.Y.); +86-898-66989095 (Y.Z.)

† These authors contributed equally to this paper

Received: 5 November 2018; Accepted: 21 November 2018; Published: date

**Abstract:** Five new compounds named asperpenes A-C (**1–3**), 12,13-dedihydroversiol (**4**), and methyl 6-oxo-3,6-dihydro-2*H*-pyran-4-carboxylate (**5**), along with 10 known compounds (**6–15**), were isolated from the fermentation broth of *Aspergillus* sp. SCS-KFD66 associated with a bivalve mollusk, *Sanguinolaria chinensis*, collected from Haikou Bay, China. The structures of the compounds, including the absolute configurations of their stereogenic carbons, were unambiguously determined by spectroscopic data, single-crystal X-ray diffraction analysis, and electronic circular dichroism (ECD) spectral analysis, along with quantum ECD calculations. The growth inhibitory activity of the compounds against four pathogenic bacterial (*Escherichia coli* ATCC 25922, *Staphylococcus aureus* ATCC 6538, *Listeria monocytogenes* ATCC 1911, and *Bacillus subtilis* ATCC 6633), their enzyme inhibitory activities against acetylcholinesterase and  $\alpha$ -glucosidase, and their DPPH radical scavenging activity were evaluated.

**Keywords:** marine-derived fungus; *Aspergillus* sp.; secondary metabolites; antibacterial activity

## List of Supporting Information

---

|                                                                                                       |    |
|-------------------------------------------------------------------------------------------------------|----|
| The 18S gene sequences of <i>Aspergillus</i> sp. SCS-KFD66.....                                       | 4  |
| Theory and Calculation Details.....                                                                   | 5  |
| Figure S1. The <sup>1</sup> H-NMR spectrum of compound 1 in CD <sub>3</sub> OD.....                   | 6  |
| Figure S2. The <sup>13</sup> C-NMR spectrum of compound 1 in CD <sub>3</sub> OD.....                  | 7  |
| Figure S3. The DEPT spectrum of compound 1 in CD <sub>3</sub> OD.....                                 | 8  |
| Figure S4. The HMQC spectrum of compound 1 in CD <sub>3</sub> OD.....                                 | 9  |
| Figure S5. The <sup>1</sup> H- <sup>1</sup> H COSY spectrum of compound 1 in CD <sub>3</sub> OD.....  | 10 |
| Figure S6. The HMBC spectrum of compound 1 in CD <sub>3</sub> OD.....                                 | 11 |
| Figure S7. The ROESY spectrum of compound 1 in CD <sub>3</sub> OD.....                                | 12 |
| Figure S8. The HRESIMS and IR spectra of compound 1.....                                              | 13 |
| Figure S9. The <sup>1</sup> H-NMR spectrum of compound 2 in CDCl <sub>3</sub> .....                   | 14 |
| Figure S10. The <sup>13</sup> C-NMR spectrum of compound 2 in CDCl <sub>3</sub> .....                 | 15 |
| Figure S11. The DEPT spectrum of compound 2 in CDCl <sub>3</sub> .....                                | 16 |
| Figure S12. The HMQC spectrum of compound 2 in CDCl <sub>3</sub> .....                                | 17 |
| Figure S13. The <sup>1</sup> H- <sup>1</sup> H COSY spectrum of compound 2 in CDCl <sub>3</sub> ..... | 18 |
| Figure S14. The HMBC spectrum of compound 2 in CDCl <sub>3</sub> .....                                | 19 |
| Figure S15. The ROESY spectrum of compound 2 in CDCl <sub>3</sub> .....                               | 20 |
| Figure S16. The HRESIMS and IR spectra of compound 2.....                                             | 21 |
| Figure S17. The <sup>1</sup> H-NMR spectrum of compound 3 in CDCl <sub>3</sub> .....                  | 22 |
| Figure S18. The <sup>13</sup> C-NMR spectrum of compound 3 in CDCl <sub>3</sub> .....                 | 23 |
| Figure S19. The DEPT spectrum of compound 3 in CDCl <sub>3</sub> .....                                | 24 |
| Figure S20. The HMQC spectrum of compound 3 in CDCl <sub>3</sub> .....                                | 25 |
| Figure S21. The <sup>1</sup> H- <sup>1</sup> H COSY spectrum of compound 3 in CDCl <sub>3</sub> ..... | 26 |
| Figure S22. The HMBC spectrum of compound 3 in CDCl <sub>3</sub> .....                                | 27 |
| Figure S23. The ROESY spectrum of compound 3 in CDCl <sub>3</sub> .....                               | 28 |
| Figure S24. The HRESIMS and IR spectra of compound 3.....                                             | 29 |
| Figure S25. The <sup>1</sup> H-NMR spectrum of compound 4 in CDCl <sub>3</sub> .....                  | 30 |
| Figure S26. The <sup>13</sup> C-NMR spectrum of compound 4 in CDCl <sub>3</sub> .....                 | 31 |
| Figure S27. The DEPT spectrum of compound 4 in CDCl <sub>3</sub> .....                                | 32 |
| Figure S28. The HMQC spectrum of compound 4 in CDCl <sub>3</sub> .....                                | 33 |
| Figure S29. The <sup>1</sup> H- <sup>1</sup> H COSY spectrum of compound 4 in CDCl <sub>3</sub> ..... | 34 |
| Figure S30. The HMBC spectrum of compound 4 in CDCl <sub>3</sub> .....                                | 35 |
| Figure S31. The ROESY spectrum of compound 4 in CDCl <sub>3</sub> .....                               | 36 |
| Figure S32. The HRESIMS and IR spectra of compound 4.....                                             | 37 |

|                                                                                                                |    |
|----------------------------------------------------------------------------------------------------------------|----|
| <b>Figure S23.</b> The $^1\text{H}$ -NMR spectrum of compound <b>5</b> in $\text{CDCl}_3$ .....                | 38 |
| <b>Figure S34.</b> The $^{13}\text{C}$ -NMR spectrum of compound <b>5</b> in $\text{CDCl}_3$ .....             | 39 |
| <b>Figure S35.</b> The DEPT spectrum of compound <b>5</b> in $\text{CDCl}_3$ .....                             | 40 |
| <b>Figure S36.</b> The HMQC spectrum of compound <b>5</b> in $\text{CDCl}_3$ . ....                            | 41 |
| <b>Figure S37.</b> The $^1\text{H}$ - $^1\text{H}$ COSY spectrum of compound <b>5</b> in $\text{CDCl}_3$ ..... | 42 |
| <b>Figure S38.</b> The HMBC spectrum of compound <b>5</b> in $\text{CDCl}_3$ .....                             | 43 |
| <b>Figure S39.</b> The HRESIMS and IR spectra of compound <b>5</b> .....                                       | 44 |

**18S gene sequences of *Aspergillus* sp. SCS-KFD66**

CATTAAATCAGTTATCGTTTATTTGATAGTACCTTACTACATGGATACCTGTGGTAATT  
CTAGAGCTAATACATGCTAAAAACCTCGACTTCGGAAGGGGTGTATTTATTAGATAA  
AAAACCAATGCCCTTCGGGGCTCCTTGGTGAATCATAATAACTTAACGAATCGCATG  
GCCTTGCGCCGGCGATGGTTCATTCAAATTTCTGCCCTATCAACTTTCGATGGTAGGAT  
AGTGGCCTACCATGGTGGCAACGGGTAACGGGGAATTAGGGTTCGATTCCGGAGAGG  
GAGCCTGAGAAACGGCTACCACATCCAAGGAAGGCAGCAGGCGCGCAAATTACCCA  
ATCCCGATACGGGGAGGTAGTGACAATAAATACTGATACGGGGCTCTTTTGGGTCTC  
GTAATTGGAATGAGTACAATTTAAATACCTTAACGAGGAACAATTGGAGGGCAAGTC  
TGGTGCCAGCAGCCGCGGTAATTCCAGCTCCAATAGCGTATATTAAGTTGTTGCAGT  
TAAAAAGCTCGTAGTTGAACCTTGGGTCTGGCTGGCCGGTCCGCCTCACCGCGAGTA  
CTGGTCCGGCTGGACCTTTCCTTCTGGGGAACCTCATGGCCTTCACTGGCTGTGGGG  
GAACCAGGACTTTTACTGTGAAAAAATTAGAGTGTTCAAAGCAGGCCTTTGCTCGAA  
TACATTAGCATGGAATAATAGAATAGGACGTGCGGTTCTATTTTGGTTTCTAGGA  
CCGCCGTAATGATTAATAGGGATAGTCGGGGGCGTCAGTATTCAGCTGTCAGAGGTG  
AAATTCTTGGATTTGCTGAAGACTAACTACTGCGAAAGCATTCCCAAGGATGTTTTTC  
ATTAATCAGGGAACGAAAGTTAGGGGATCGAAGACGATCAGATACCGTCGTAGTCTT  
AACCATAAACTATGCCGACTAGGGATCGGGCGGTGTTTCTATGATGACCCGCTCGGC  
ACCTTACGAGAAATCAAAGTTTTTGGGTTCTGGGGGAGTATGGTCGCAAGGCTGAA  
ACTTAAAGAAATTGACGGAAGGGCACCACAAGGCGTGGAGCCTGCGGCTTAATTTGA  
CTCAACACGGGGAAACTCACCAGGTCCAGACAAAATAAGGATTGACAGATTGAGAG  
CTCTTTCTTGATCTTTTGGATGGTGGTGCATGGCCGTTCTTAGTTGGTGGAGTGATTTGT  
CTGCTTAATTGCGATAACGAACGAGACCTCGGCCCTTAAATAGCCCAAGA

**Theory and Calculation Details.** The calculations were performed by using the density functional theory (DFT) as carried out in the Gaussian 03.<sup>51</sup> The preliminary conformational distributions search was performed by HyperChem 7.5 software. All ground-state geometries were further optimized at the B3LYP/6-31G(d) level. Conformers within a 2 kcal/mol energy threshold from the global minimum were selected to calculate the electronic transitions<sup>52</sup>. The overall theoretical ECD spectra were obtained according to the Boltzmann weighting of each conformers. Solvent effects of methanol solution were evaluated at the same DFT level by using the SCRF/PCM method.<sup>53</sup>

(S1) Gaussian 03, Revision E.01, M. J. Frisch, G. W. Trucks, H. B. Schlegel, G. E. Scuseria, M. A. Robb, J. R. Cheeseman, J. A. Montgomery, Jr., T. Vreven, K. N. Kudin, J.C. Burant, J. M. Millam, S. S. Iyengar, J. Tomasi, V. Barone, B. Mennucci, M. Cossi, G. Scalmani, N. Rega, G. A. Petersson, H. Nakatsuji, M. Hada, M. Ehara, K. Toyota, R. Fukuda, J. Hasegawa, M. Ishida, T. Nakajima, Y. Honda, O. Kitao, H. Nakai, M. Klene, X. Li, J. E. Knox, H. P. Hratchian, J. B. Cross, V. Bakken, C. Adamo, J. Jaramillo, R. Gomperts, R. E. Stratmann, O. Yazyev, A. J. Austin, R. Cammi, C. Pomelli, J. W. Ochterski, P. Y. Ayala, K. Morokuma, G. A. Voth, P. Salvador, J. J. Dannenberg, V. G. Zakrzewski, S. Dapprich, A. D. Daniels, M. C. Strain, O. Farkas, D. K. Malick, A. D. Rabuck, K. Raghavachari, J. B. Foresman, J. V. Ortiz, Q. Cui, A. G. Baboul, S. Clifford, J. Cioslowski, B. B. Stefanov, G. Liu, A. Liashenko, P. Piskorz, I. Komaromi, R. L. Martin, D.J. Fox, T. Keith, M. A. Al-Laham, C. Y. Peng, A. Nanayakkara, M. Challacombe, P. M. W. Gill, B. Johnson, W. Chen, M. W. Wong, C. Gonzalez, and J. A. Pople, Gaussian, Inc., Wallingford CT, 2004.

(S2) Sai, C.; Li, D.; Xue, C.; Wang, K.; Hu, P.; Pei, Y.; Bai, J.; Jing Y.; Li, Z.; Hua H. *Org. Lett.* **2015**, *17*, 4102-5.

(S3) (a) Miertus, S.; Tomasi, J. *Chem. Phys.* **1982**, *65*, 239–245. (b) Tomasi, J.; Persico, M. *Chem.Rev.* **1994**, *94*, 2027–2094. (c) Cammi, R.; Tomasi, J. J. *Comp.Chem.* **1995**, *16*, 1449–1458.

Figure S1. The  $^1\text{H}$  NMR spectrum of compound 1 in  $\text{CD}_3\text{OD}$

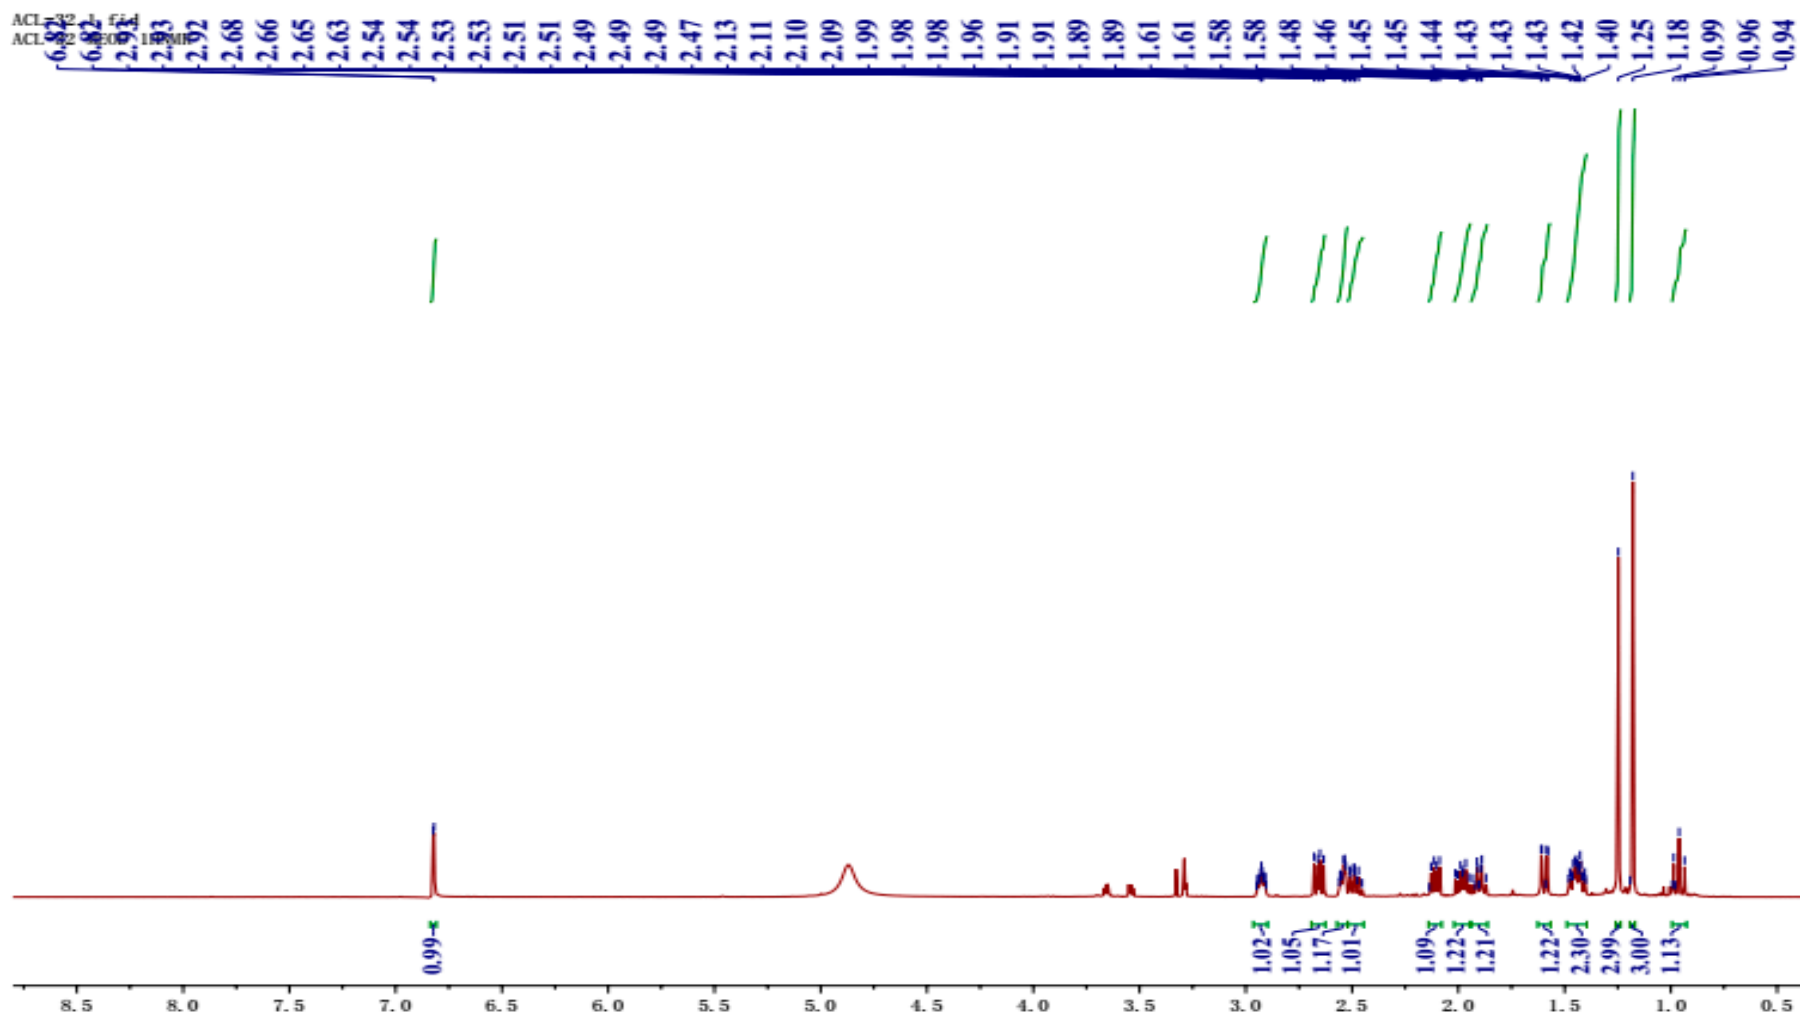

Figure S2. The  $^{13}\text{C}$ -NMR spectrum of compound 1 in  $\text{CD}_3\text{OD}$

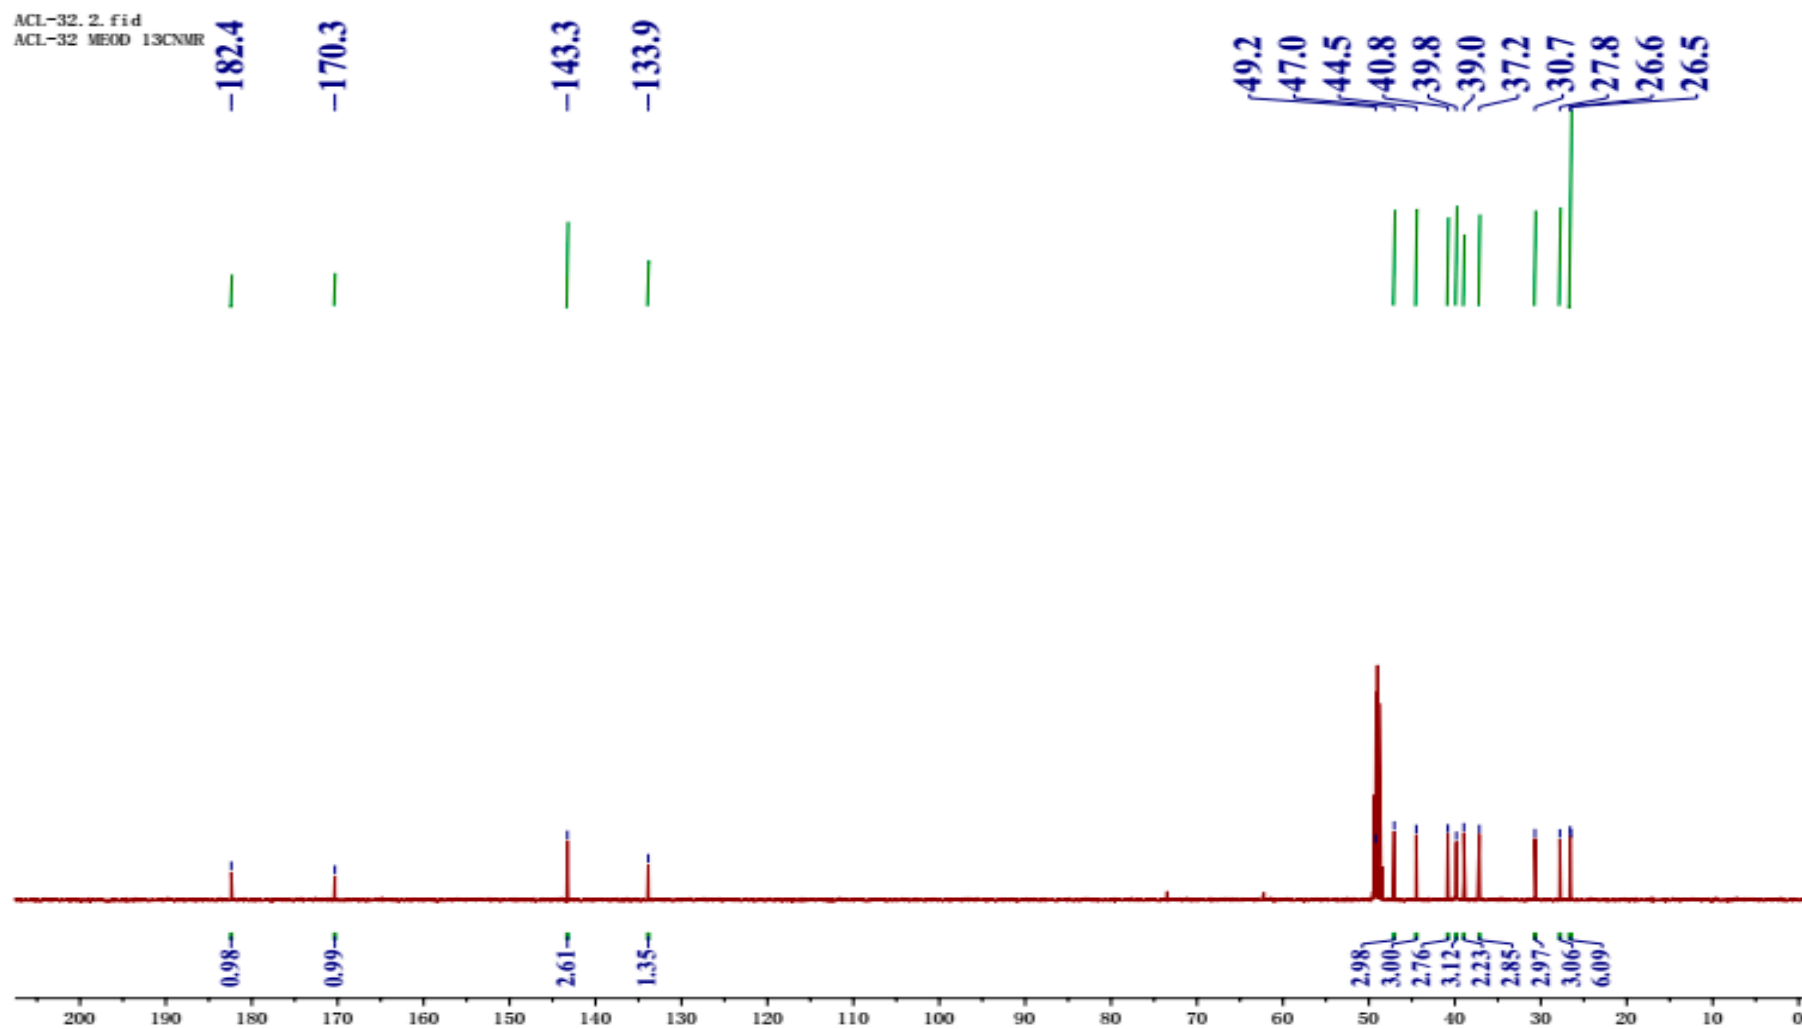

Figure S3. The DEPT spectrum of compound 1 in CD<sub>3</sub>OD

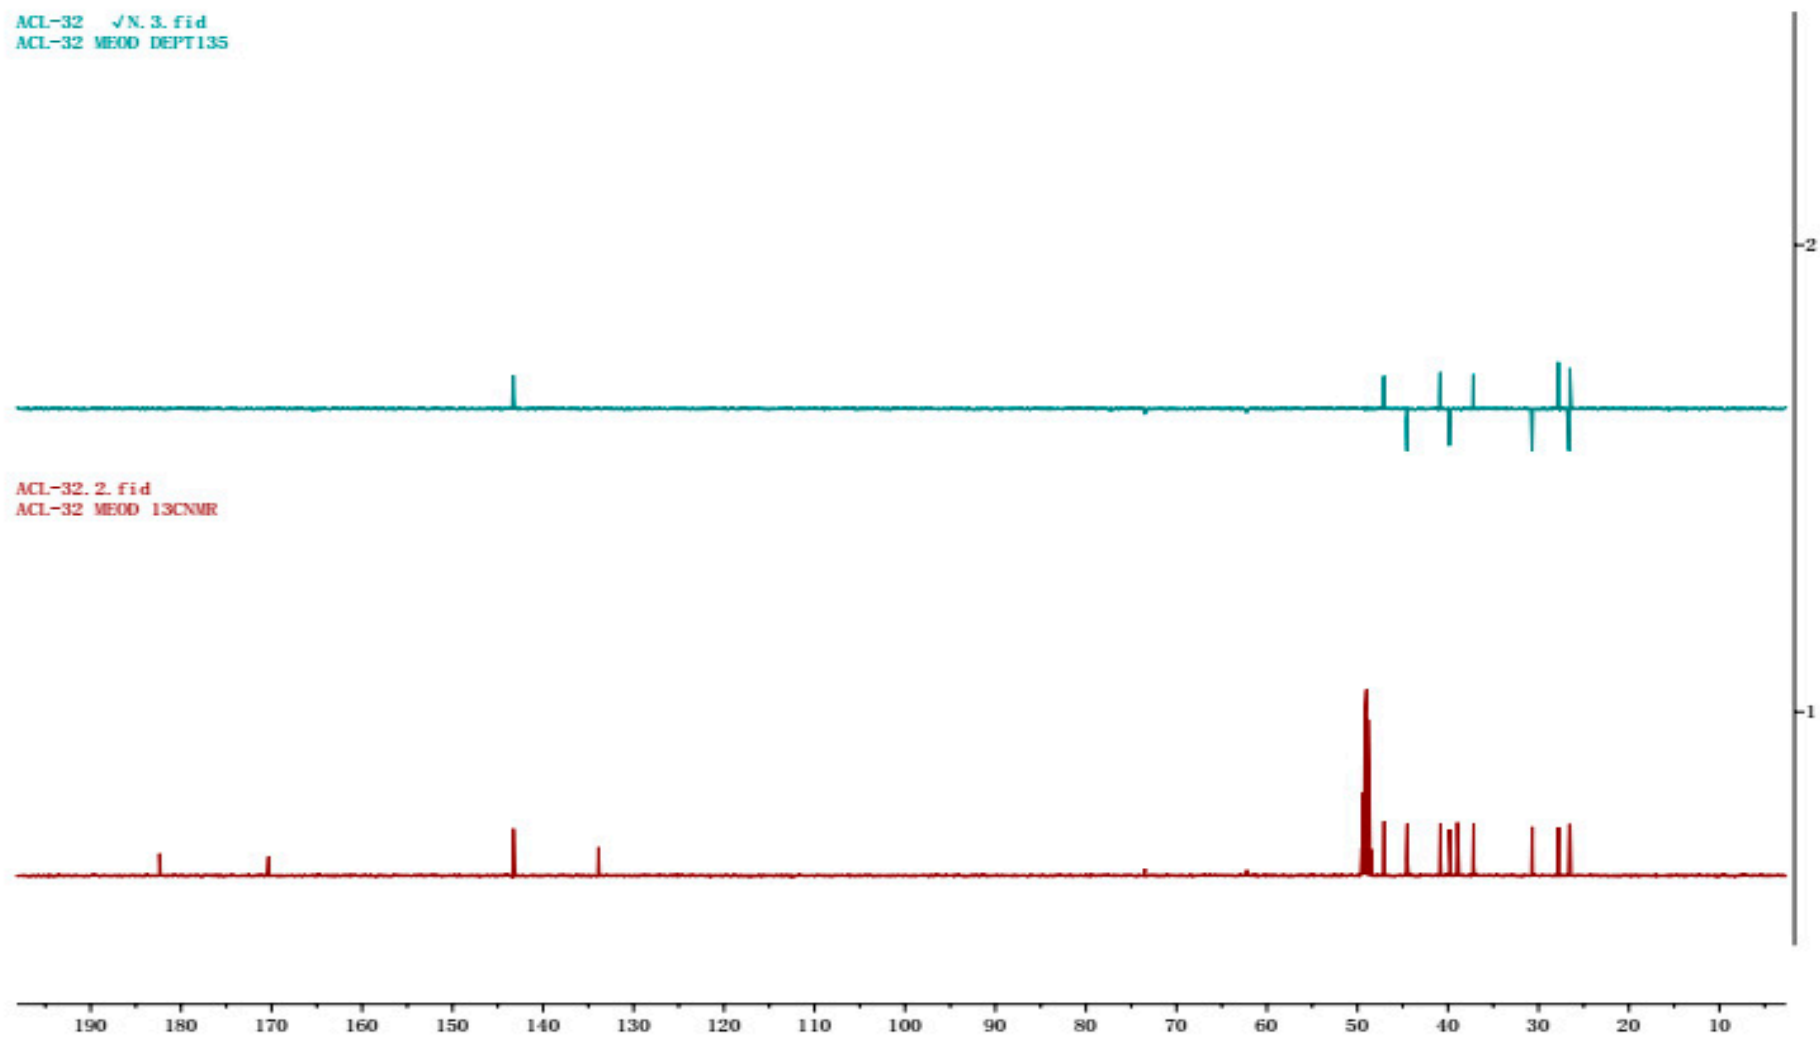



Figure S4. The HSQC spectrum of compound 1 in CD<sub>3</sub>OD

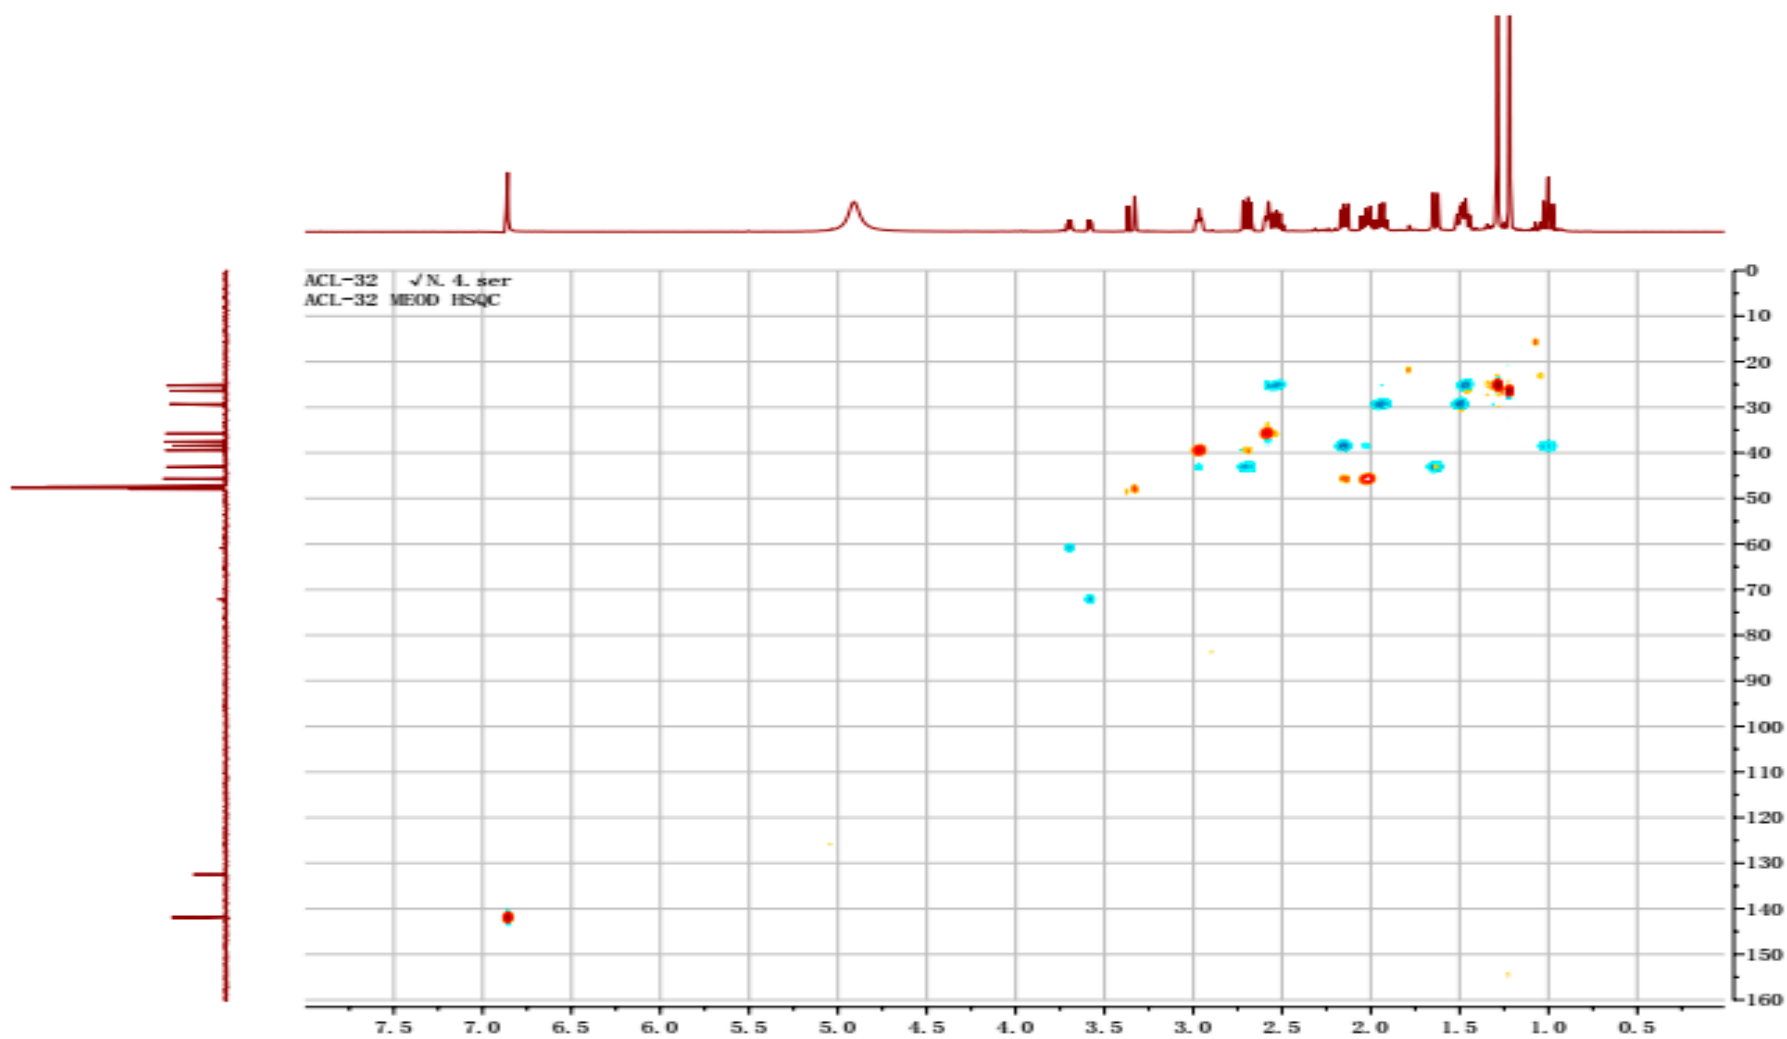

Figure S5. The  $^1\text{H}$ - $^1\text{H}$  COSY spectrum of compound **1** in  $\text{CD}_3\text{OD}$

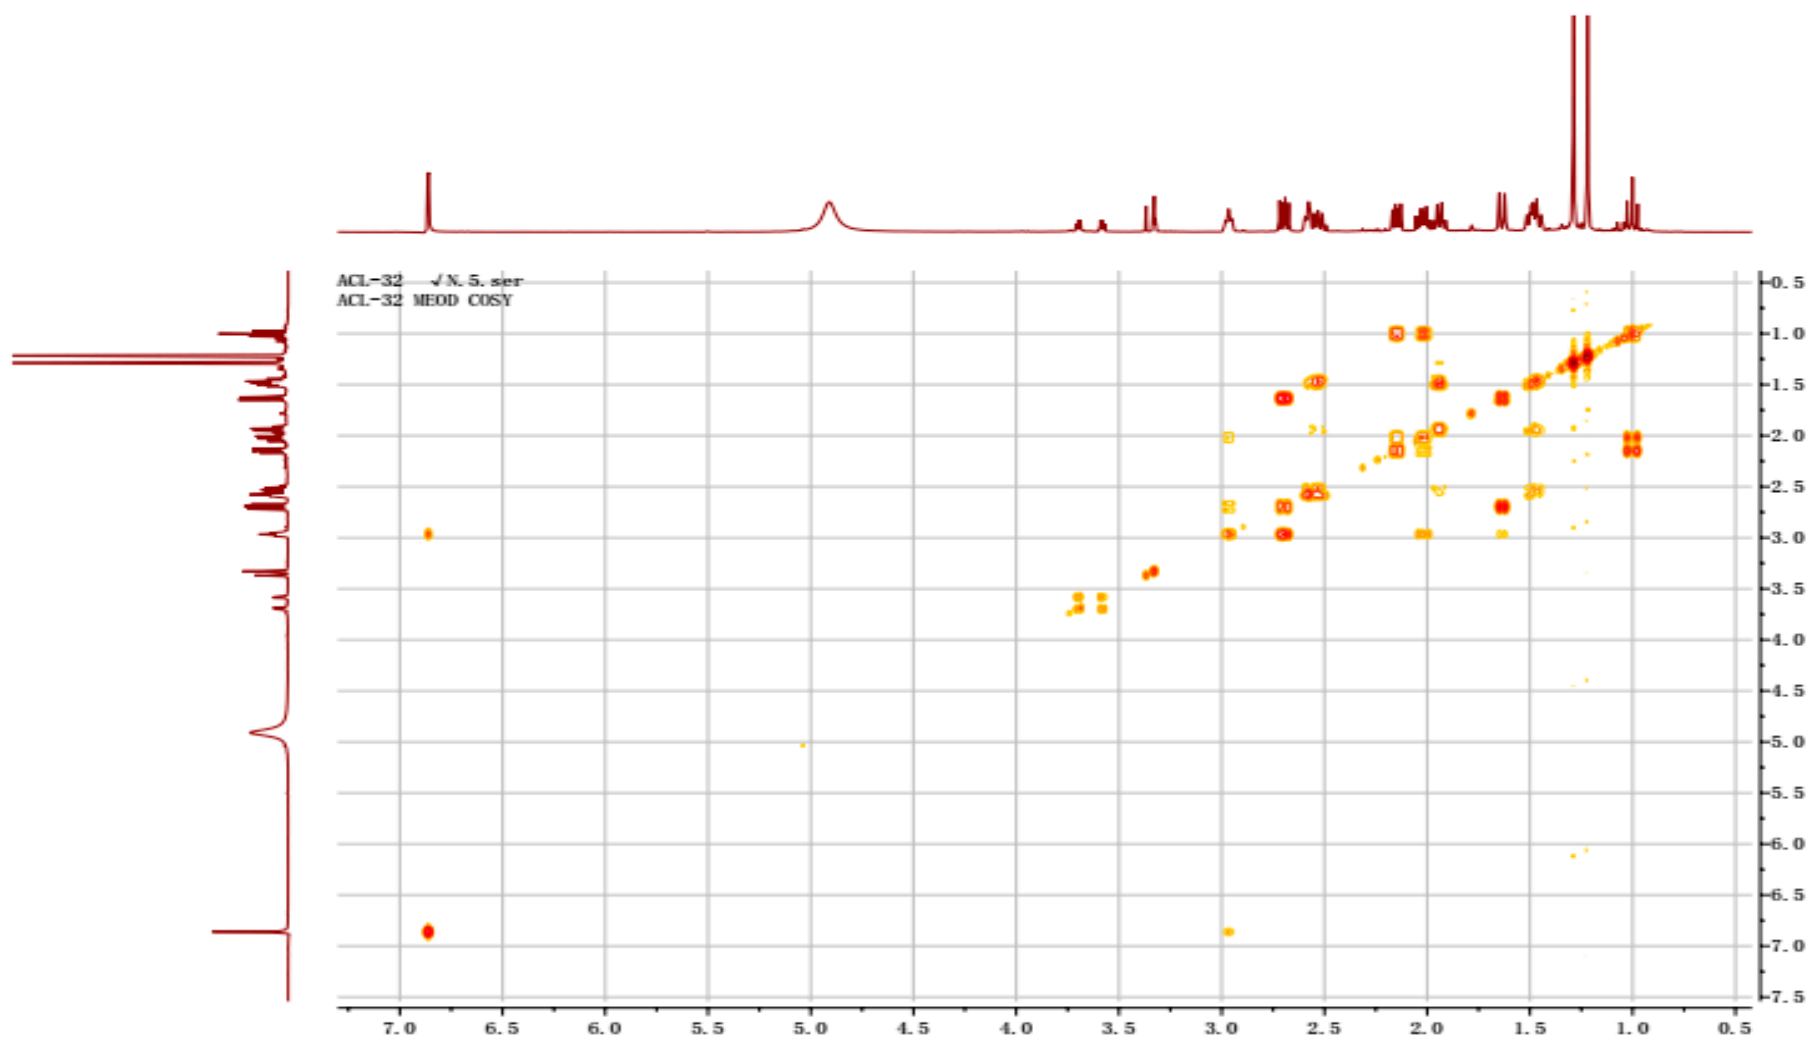

Figure S6. The HMBC spectrum of compound 1 in CD<sub>3</sub>OD

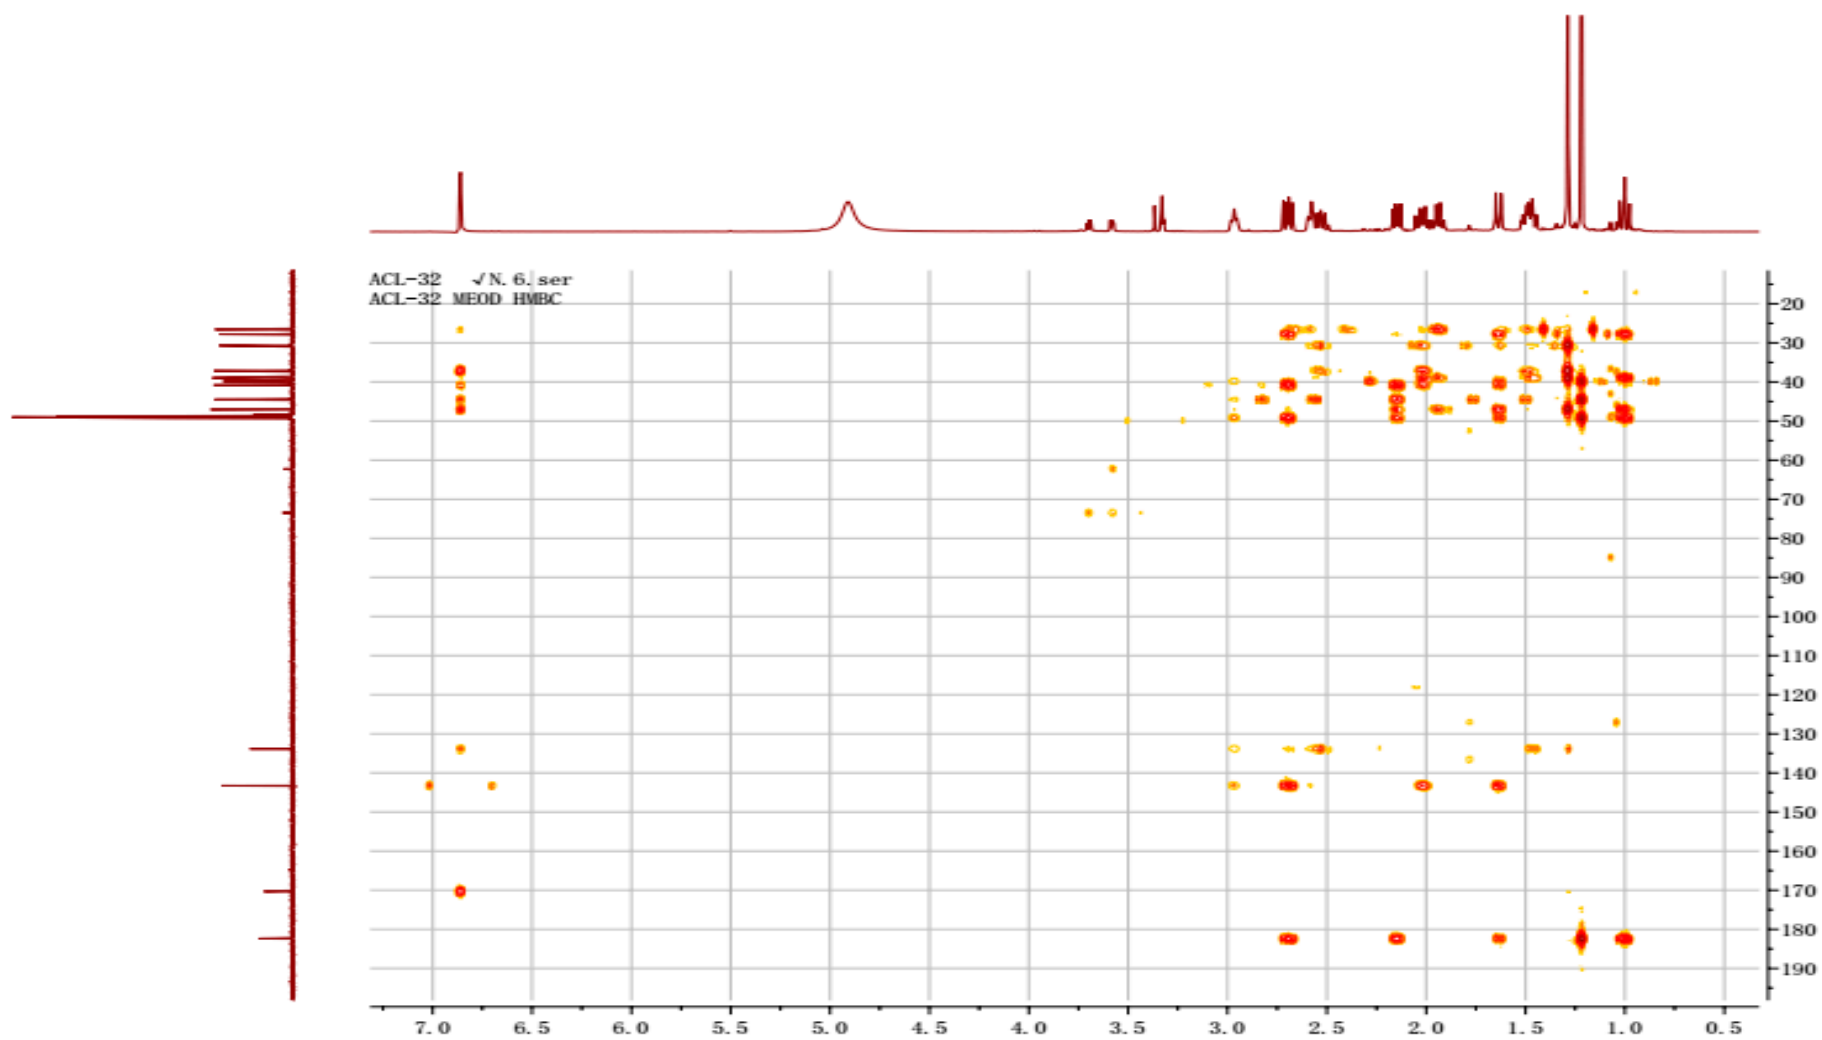

Figure S7. The ROESY spectrum of compound 1 in CD<sub>3</sub>OD

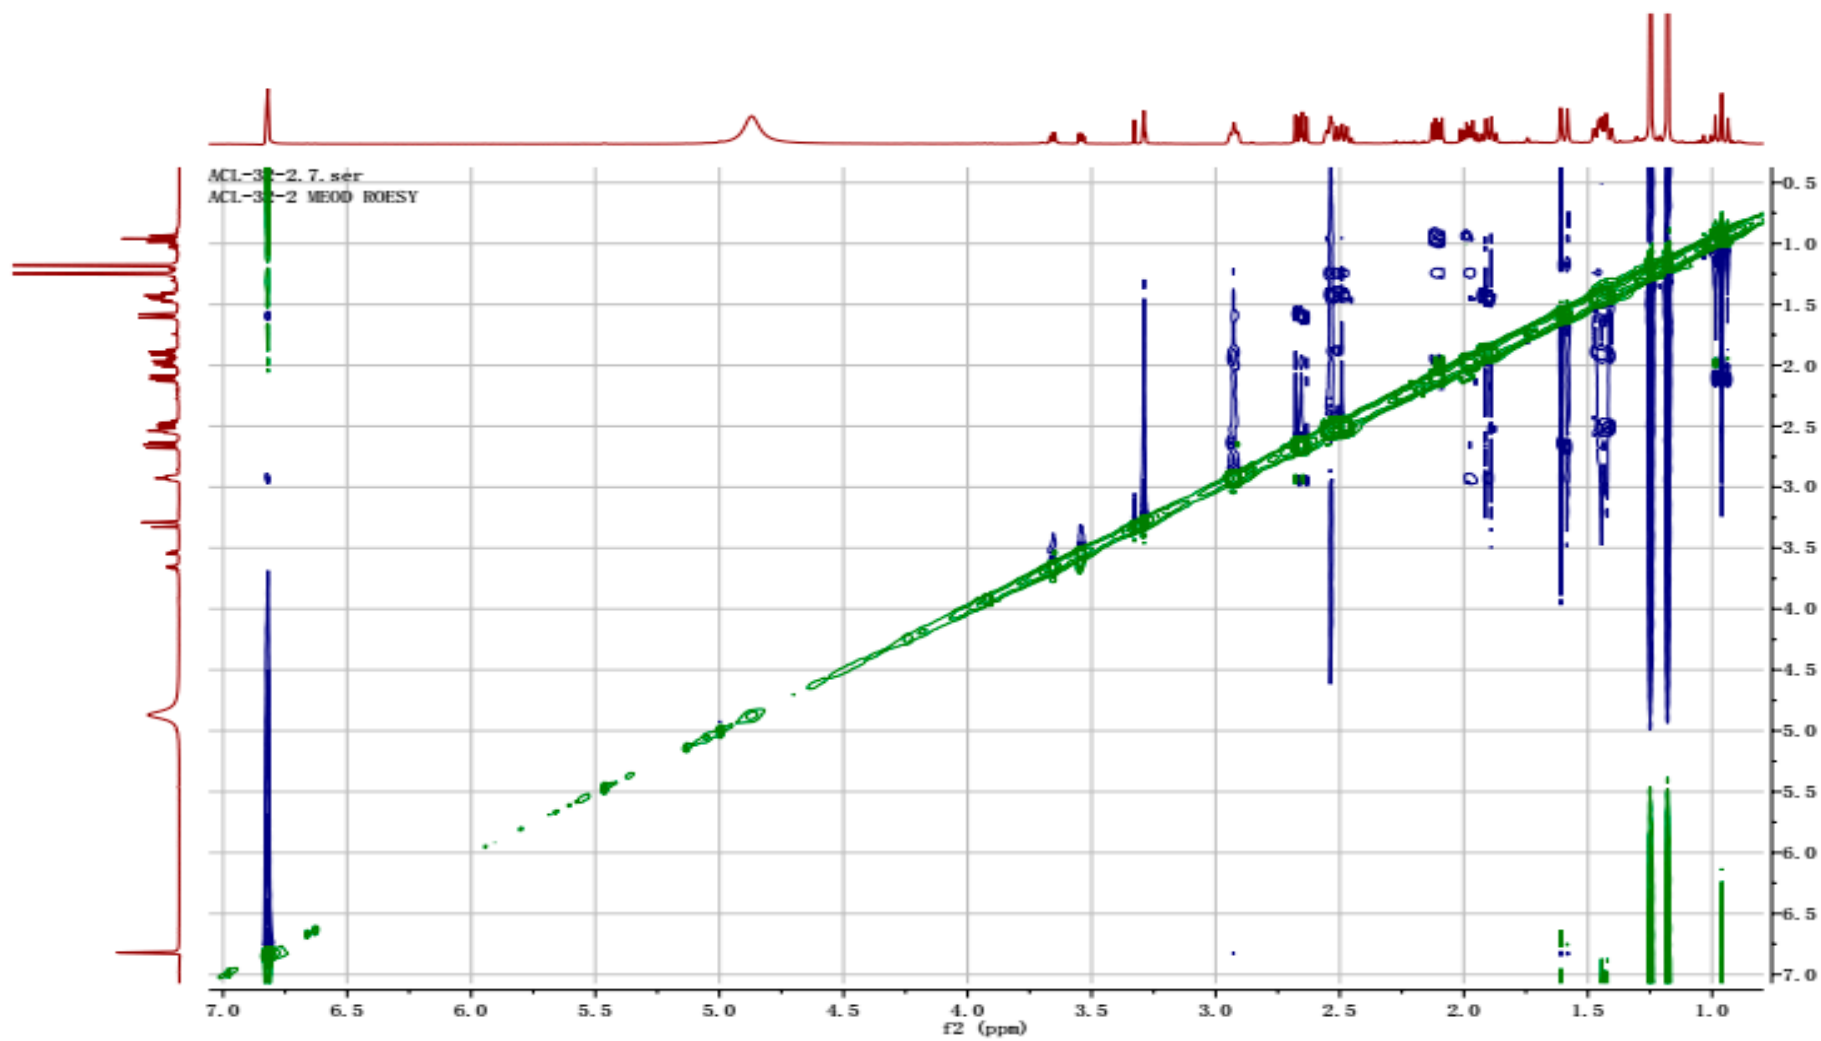

Figure S8. The HRESIMS and IR spectra of compound 1

Event#: 2 MS(E-) Ret. Time : 0.893 - 1.147 -> 1.573 Scan# : 136 - 174 -> 238

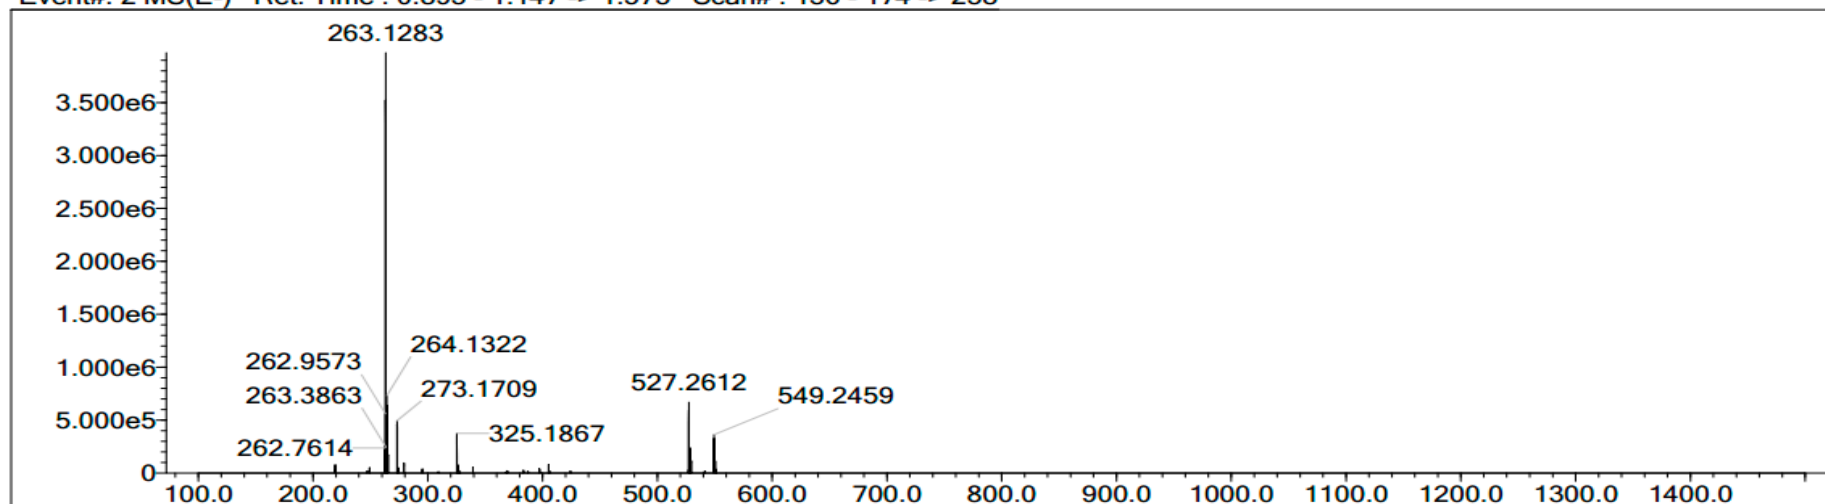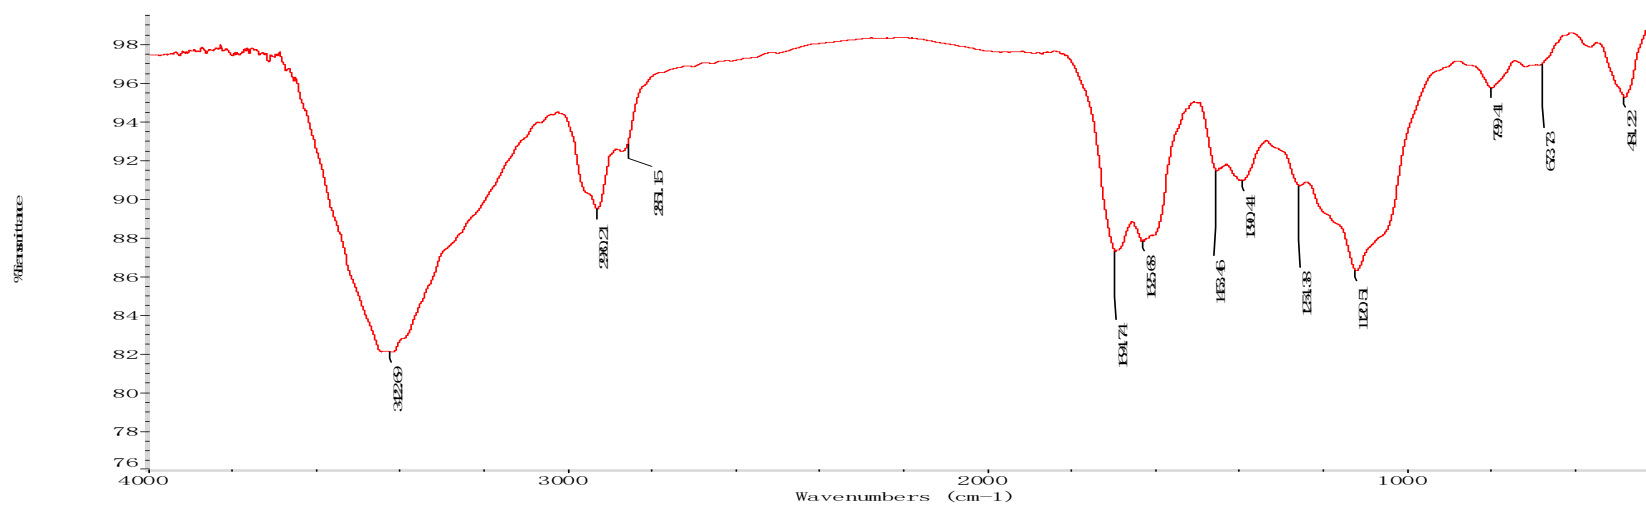

Figure S9. The  $^1\text{H}$  NMR spectrum of compound 2 in  $\text{CDCl}_3$

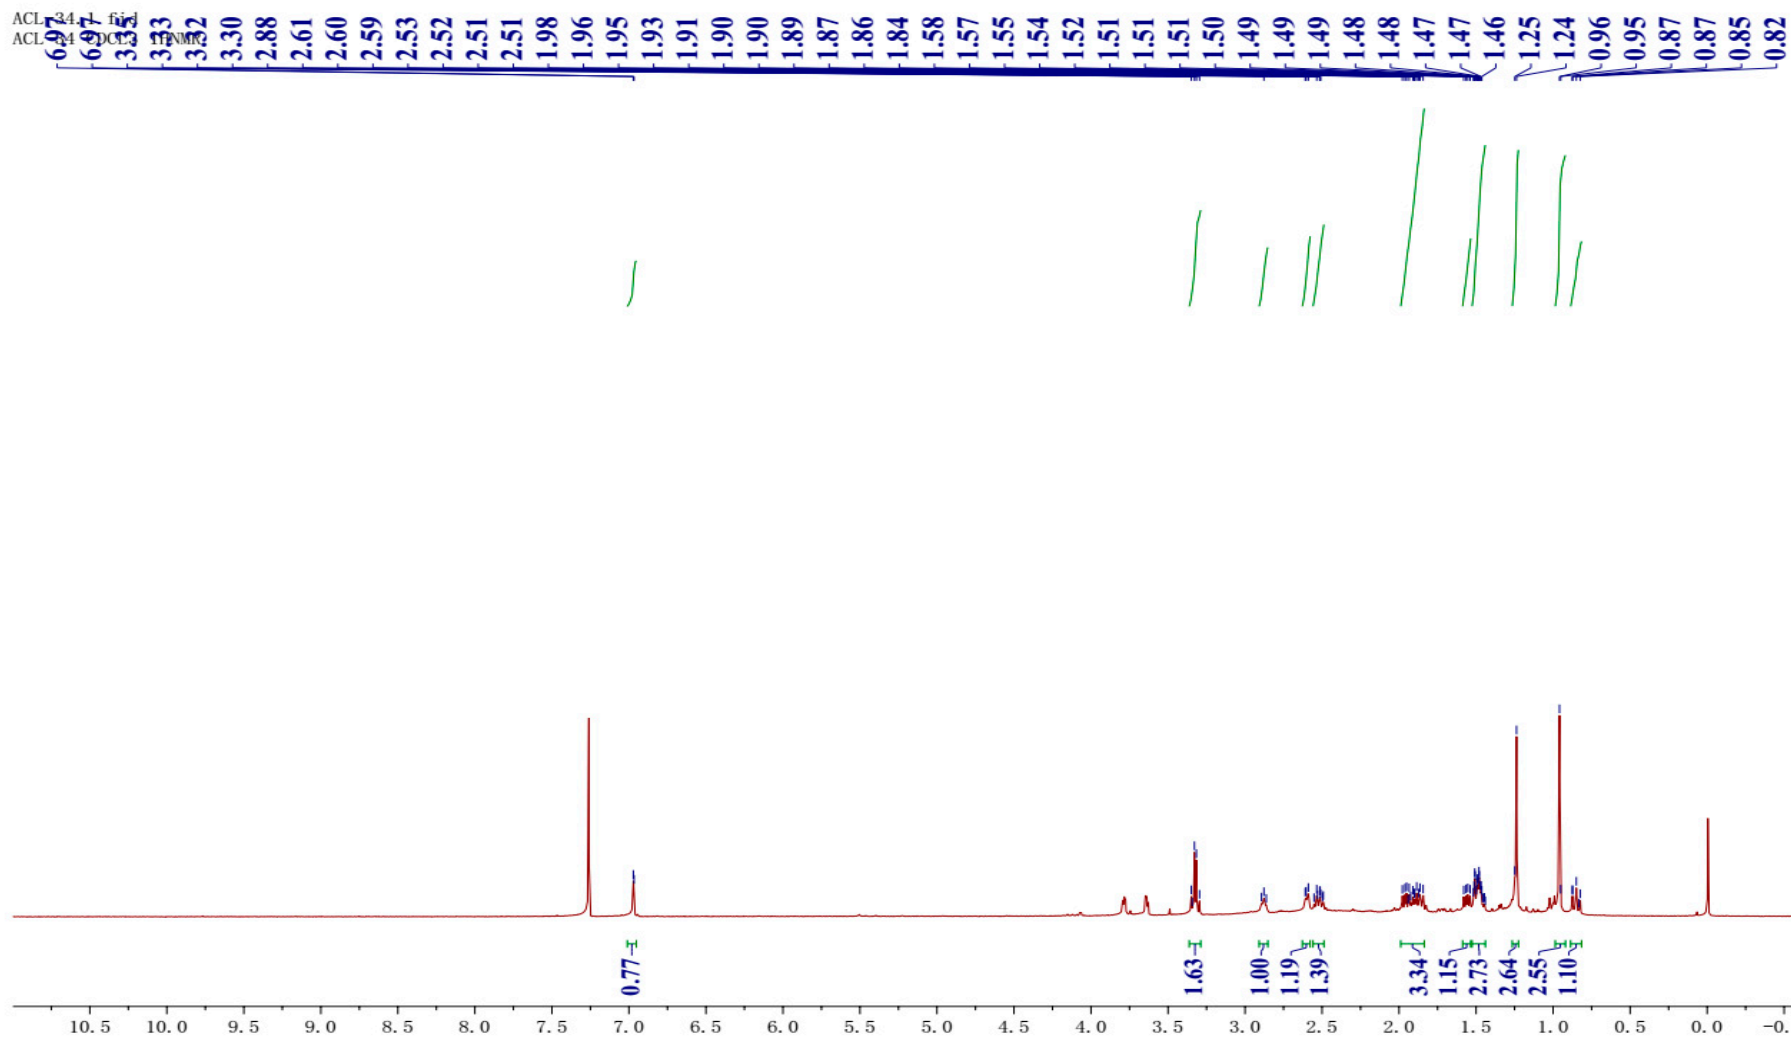

Figure S10. The  $^{13}\text{C}$ -NMR spectrum of compound 2 in  $\text{CDCl}_3$

ACL-34. 2. fid  
ACL-34 CDCL3 13CNMR

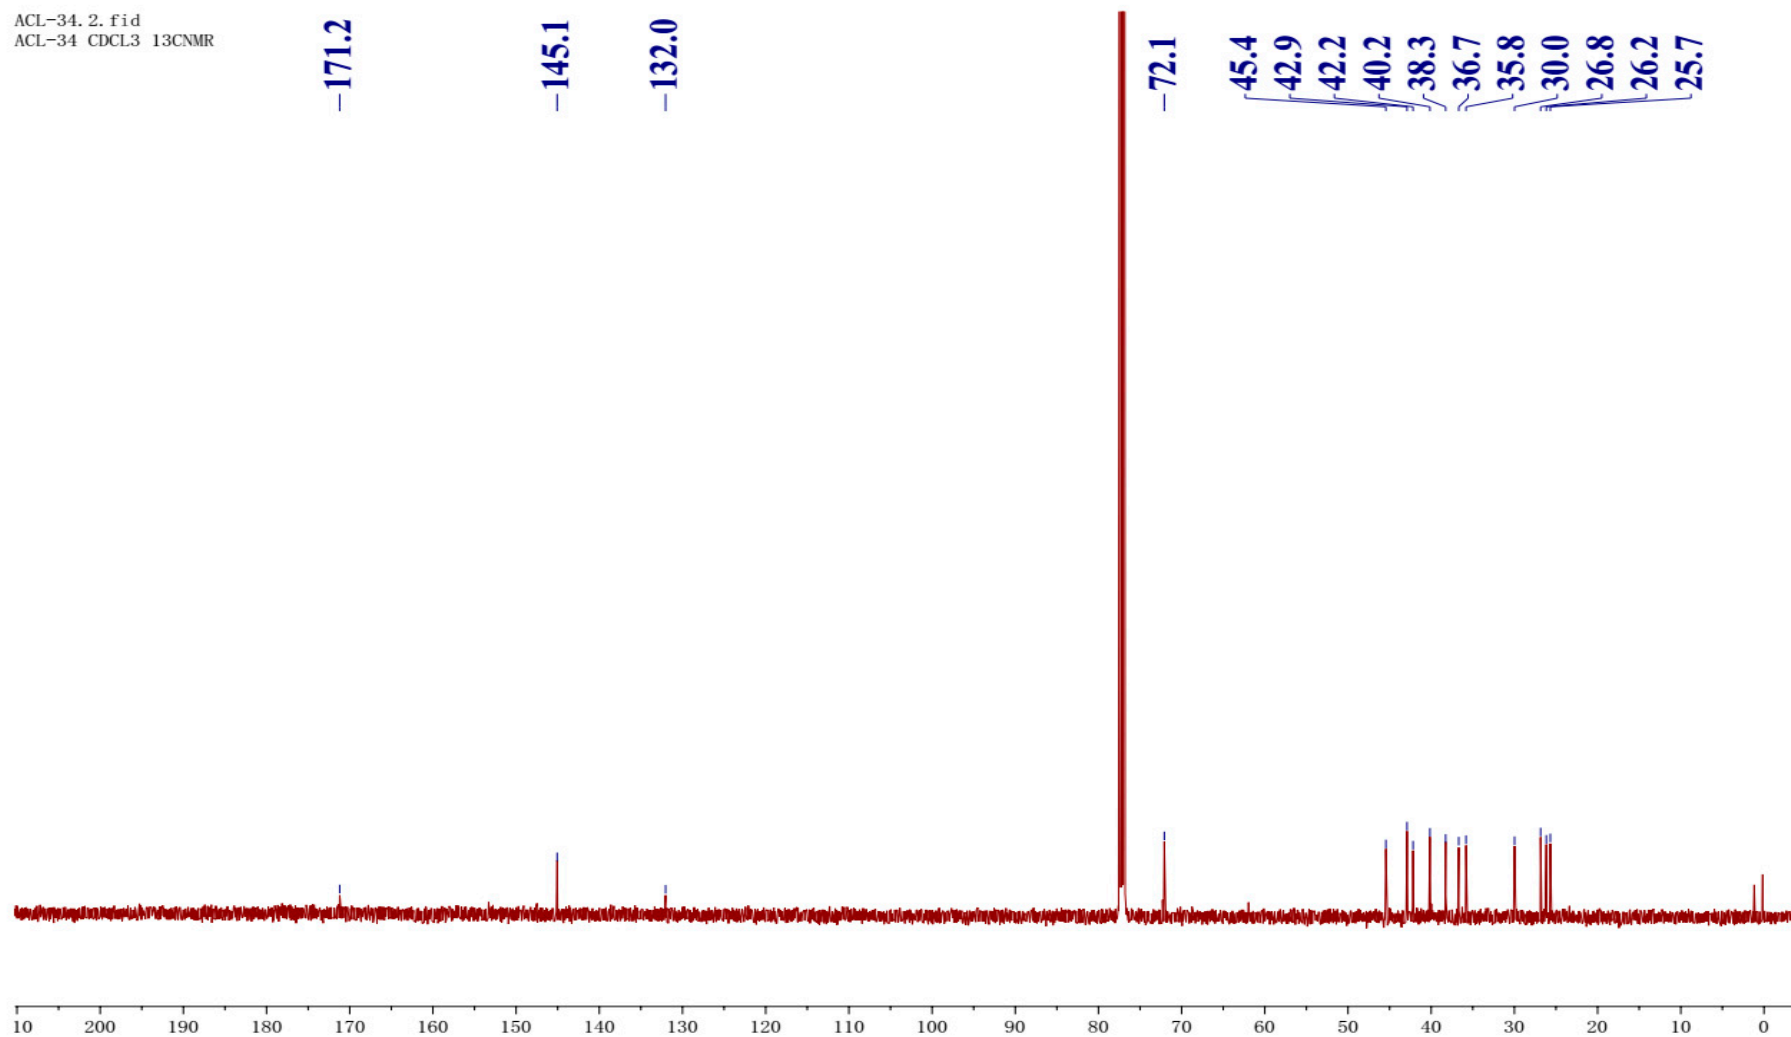

Figure S11. The DEPT spectrum of compound 2 in CDCl<sub>3</sub>

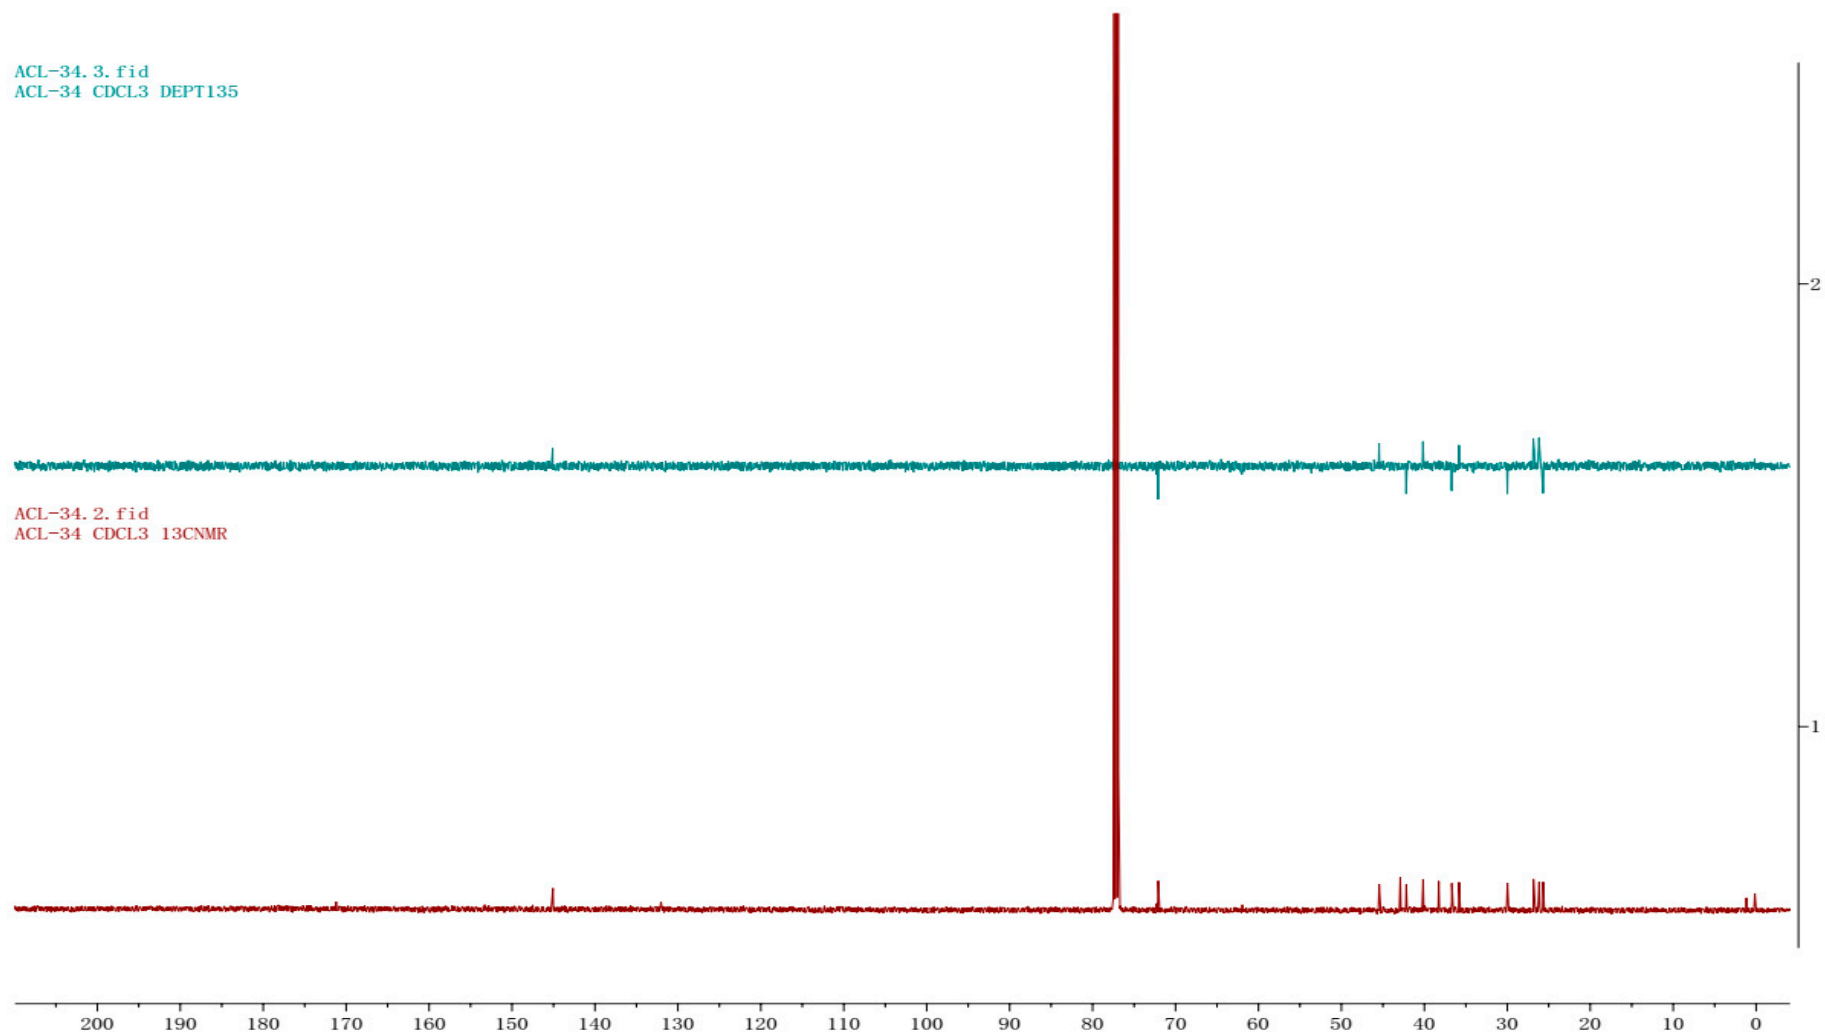



Figure S12. The HSQC spectrum of compound 2 in CDCl<sub>3</sub>

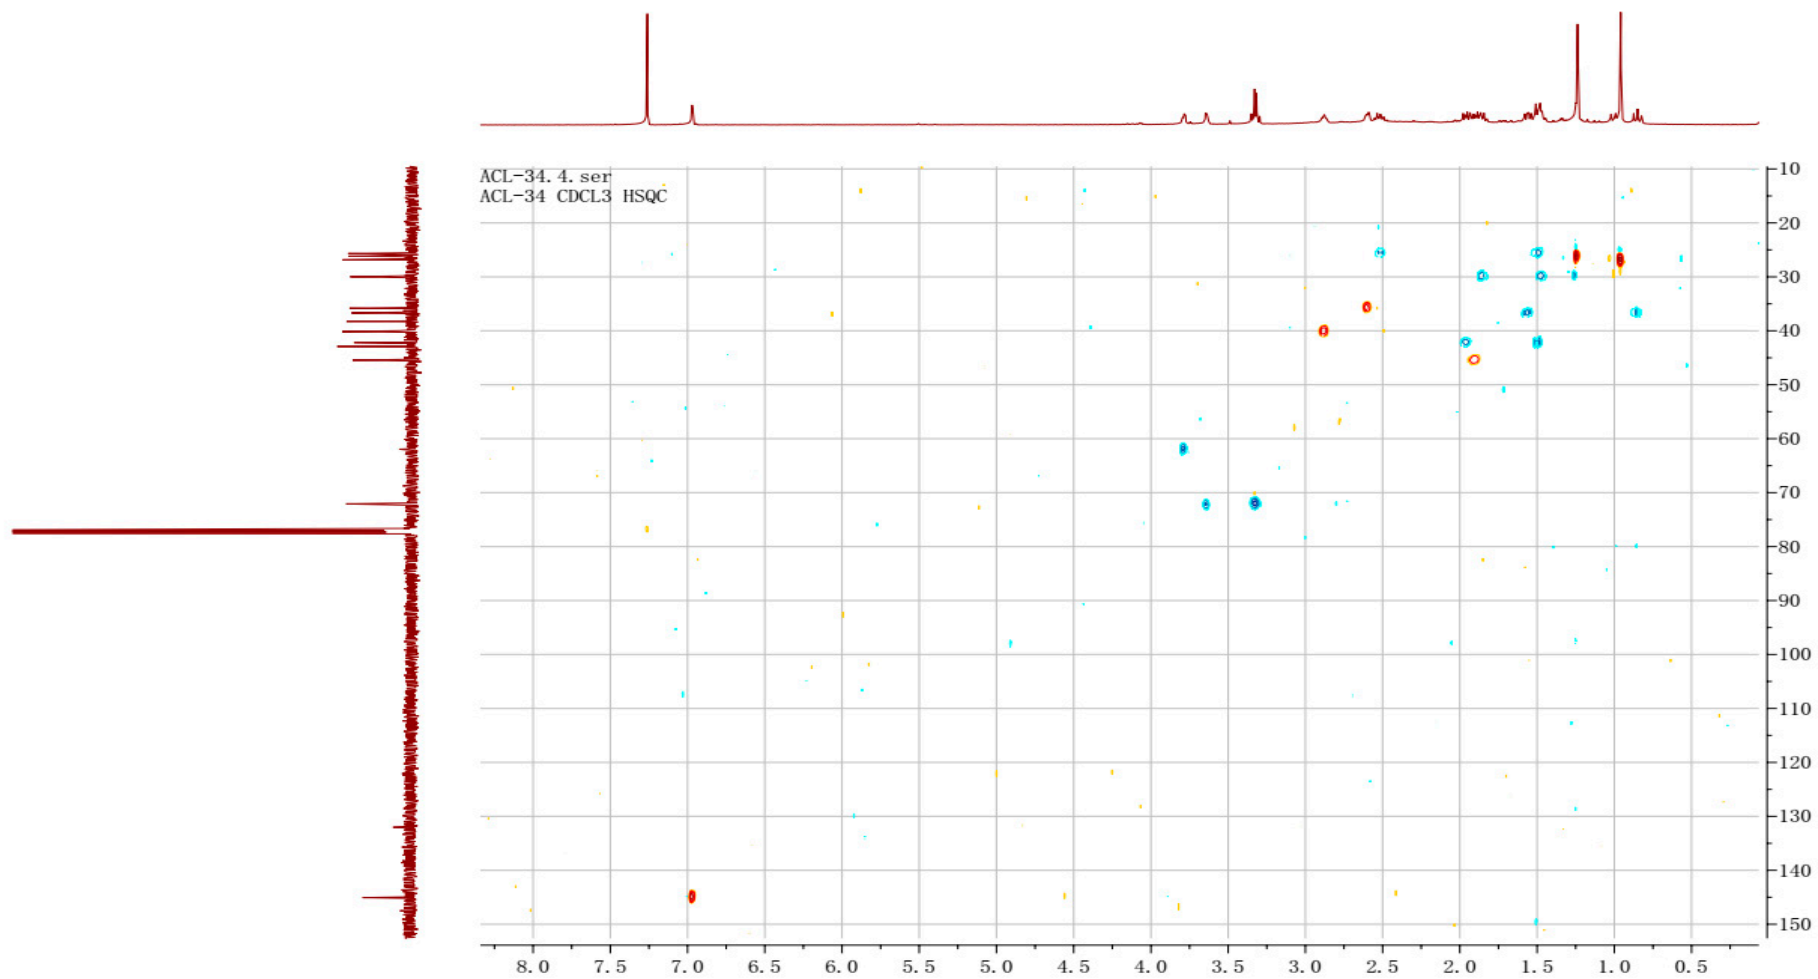

Figure S13. The  $^1\text{H}$ - $^1\text{H}$  COSY spectrum of compound 2 in  $\text{CDCl}_3$

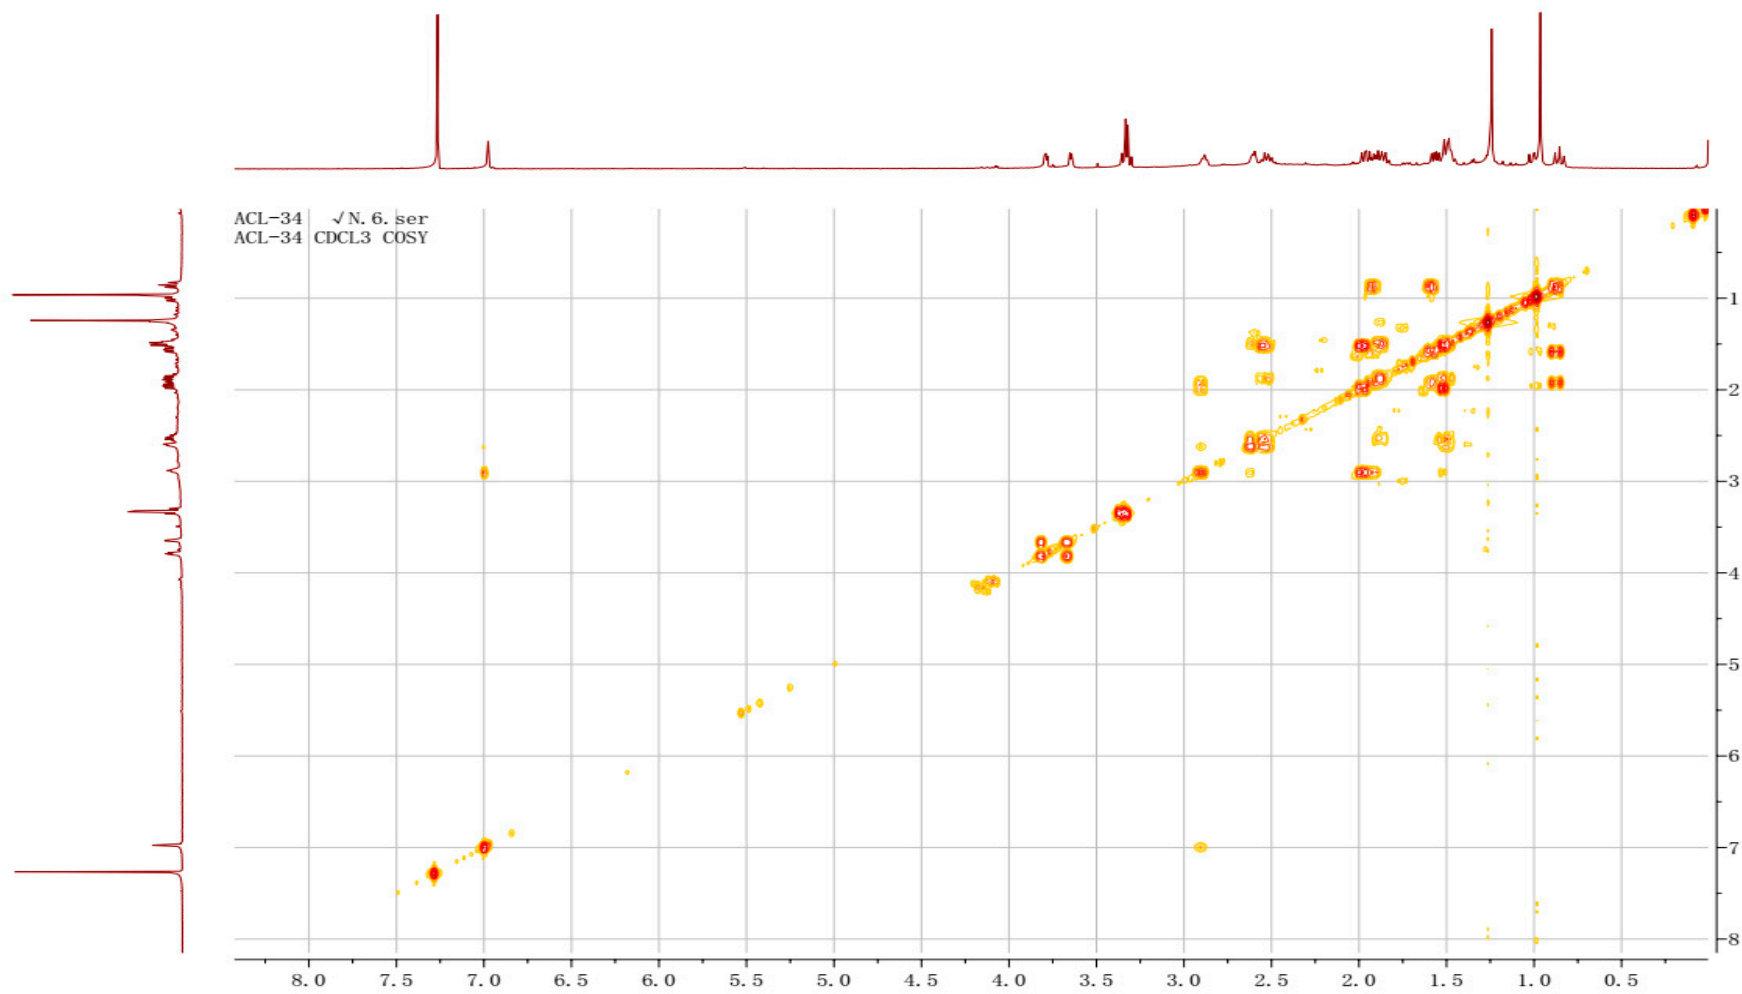

Figure S14. The HMBC spectrum of compound **2** in CDCl<sub>3</sub>

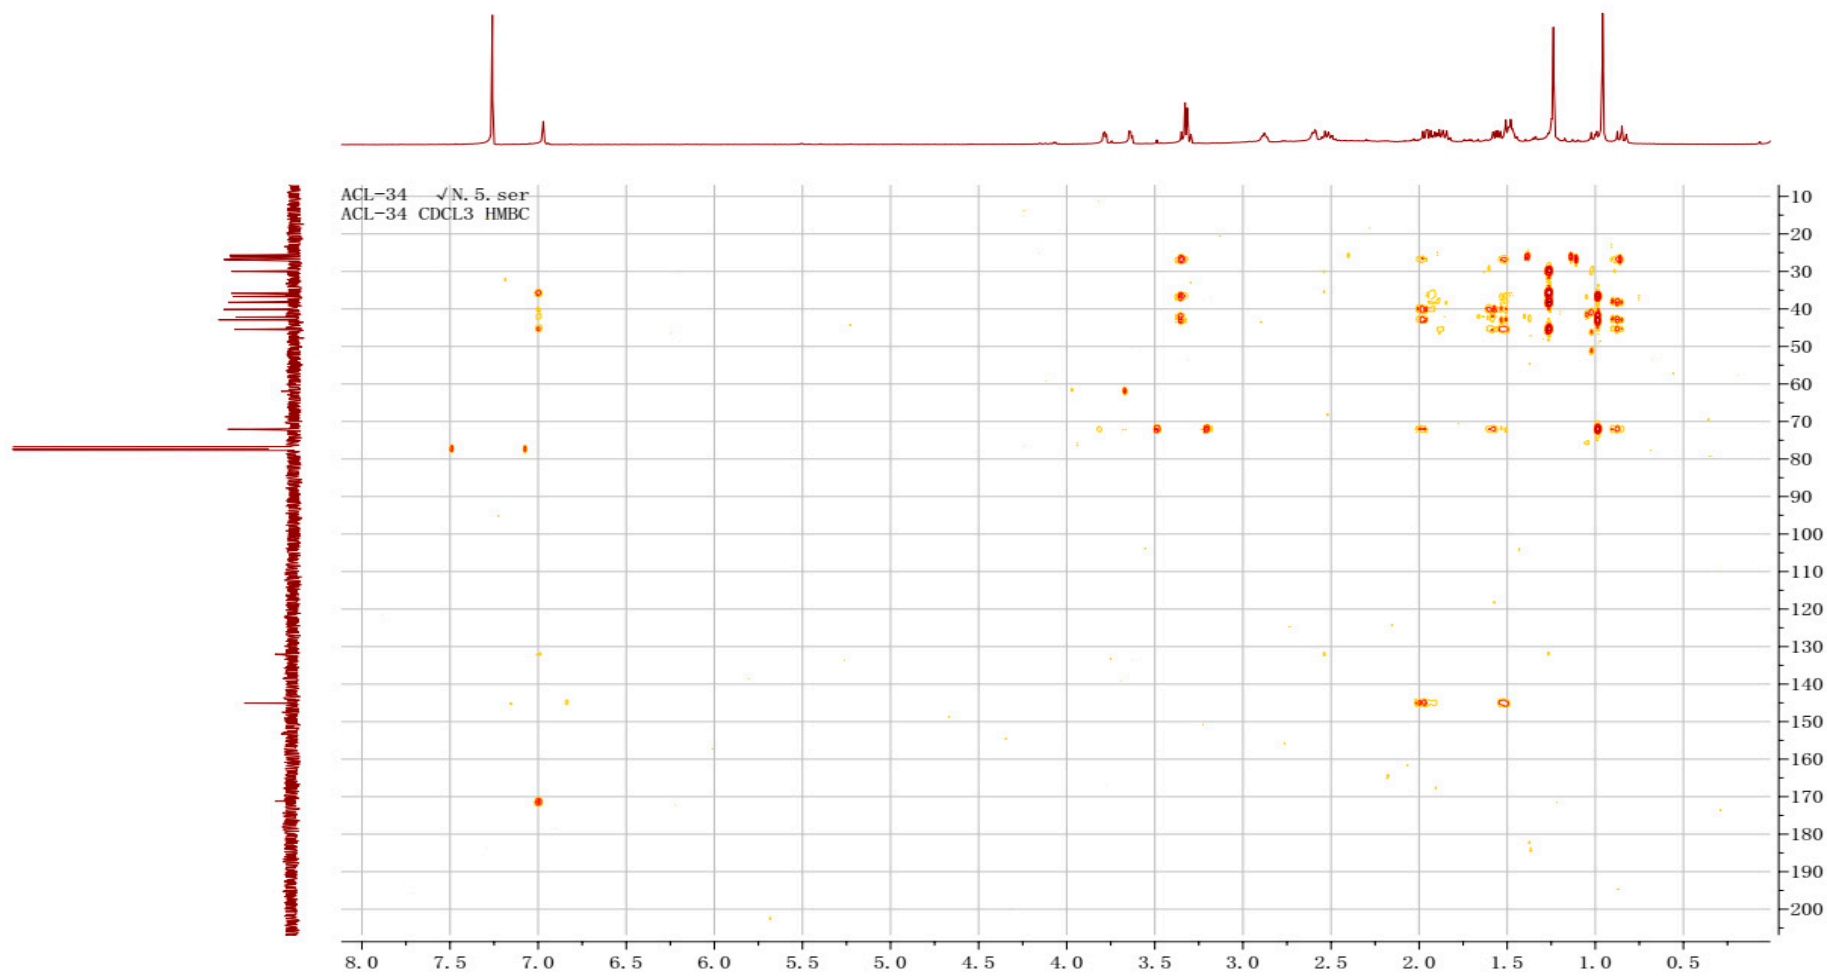

Figure S15. The ROESY spectrum of compound 2 in CDCl<sub>3</sub>

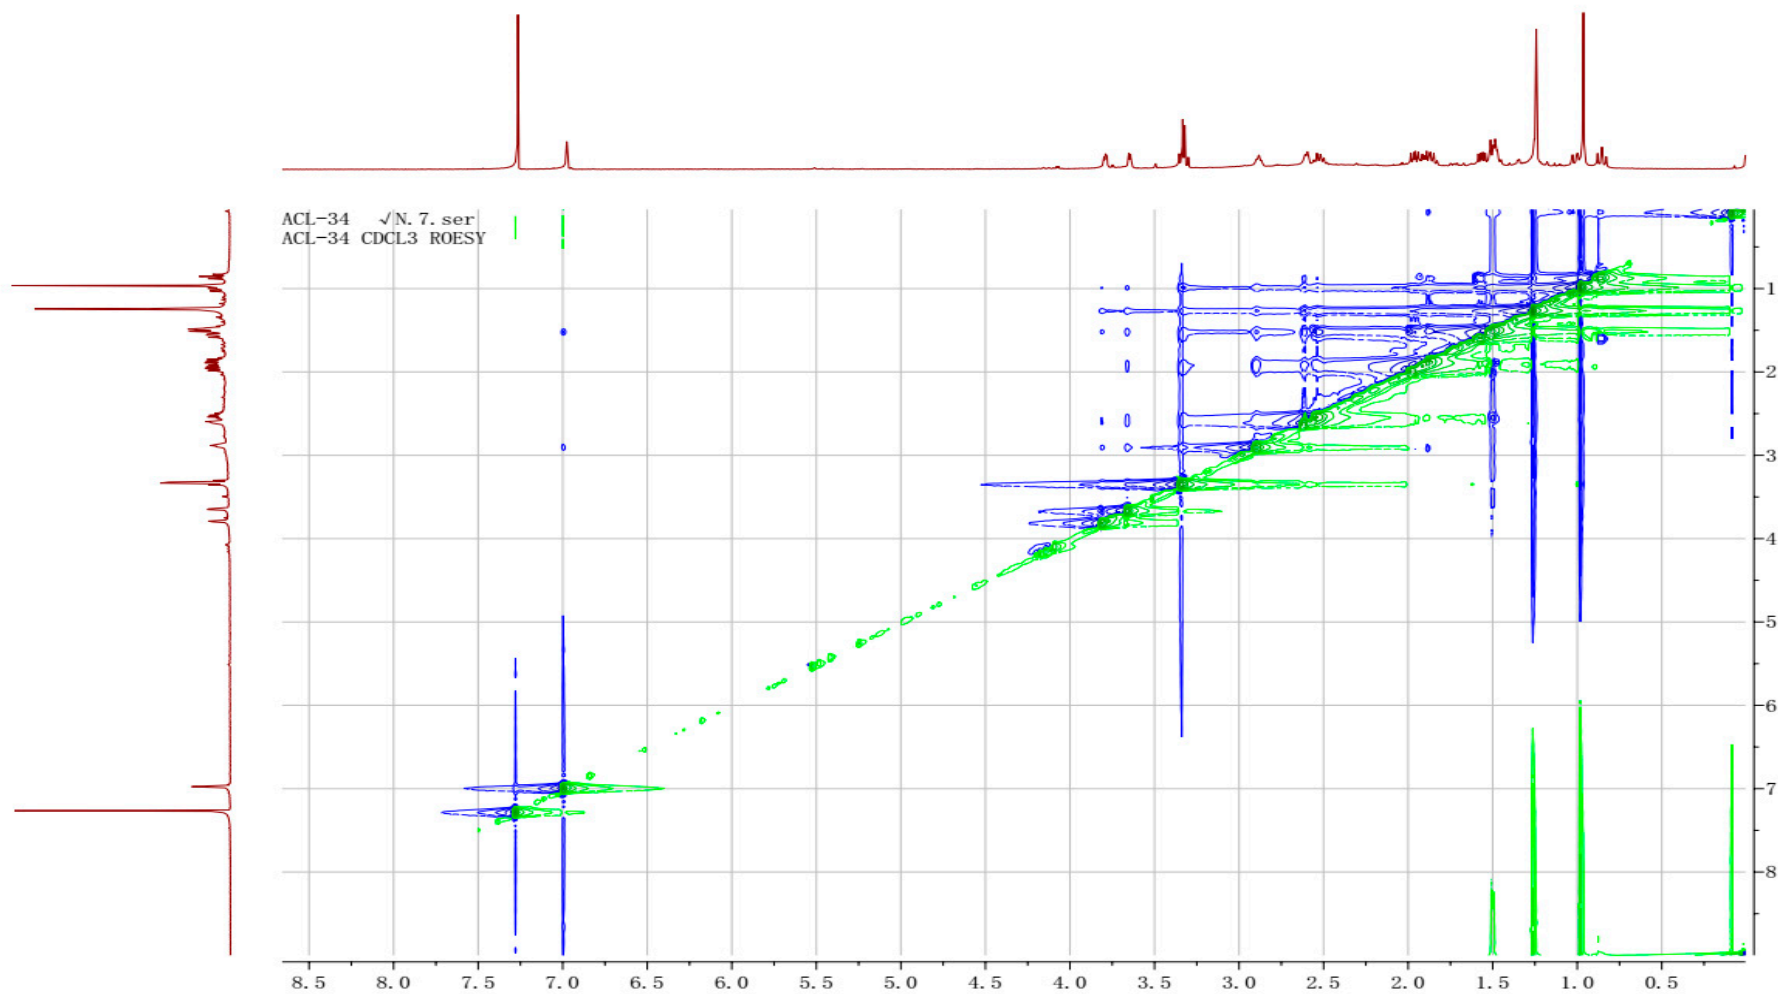

Figure S16. The HRESIMS and IR spectra of compound 2

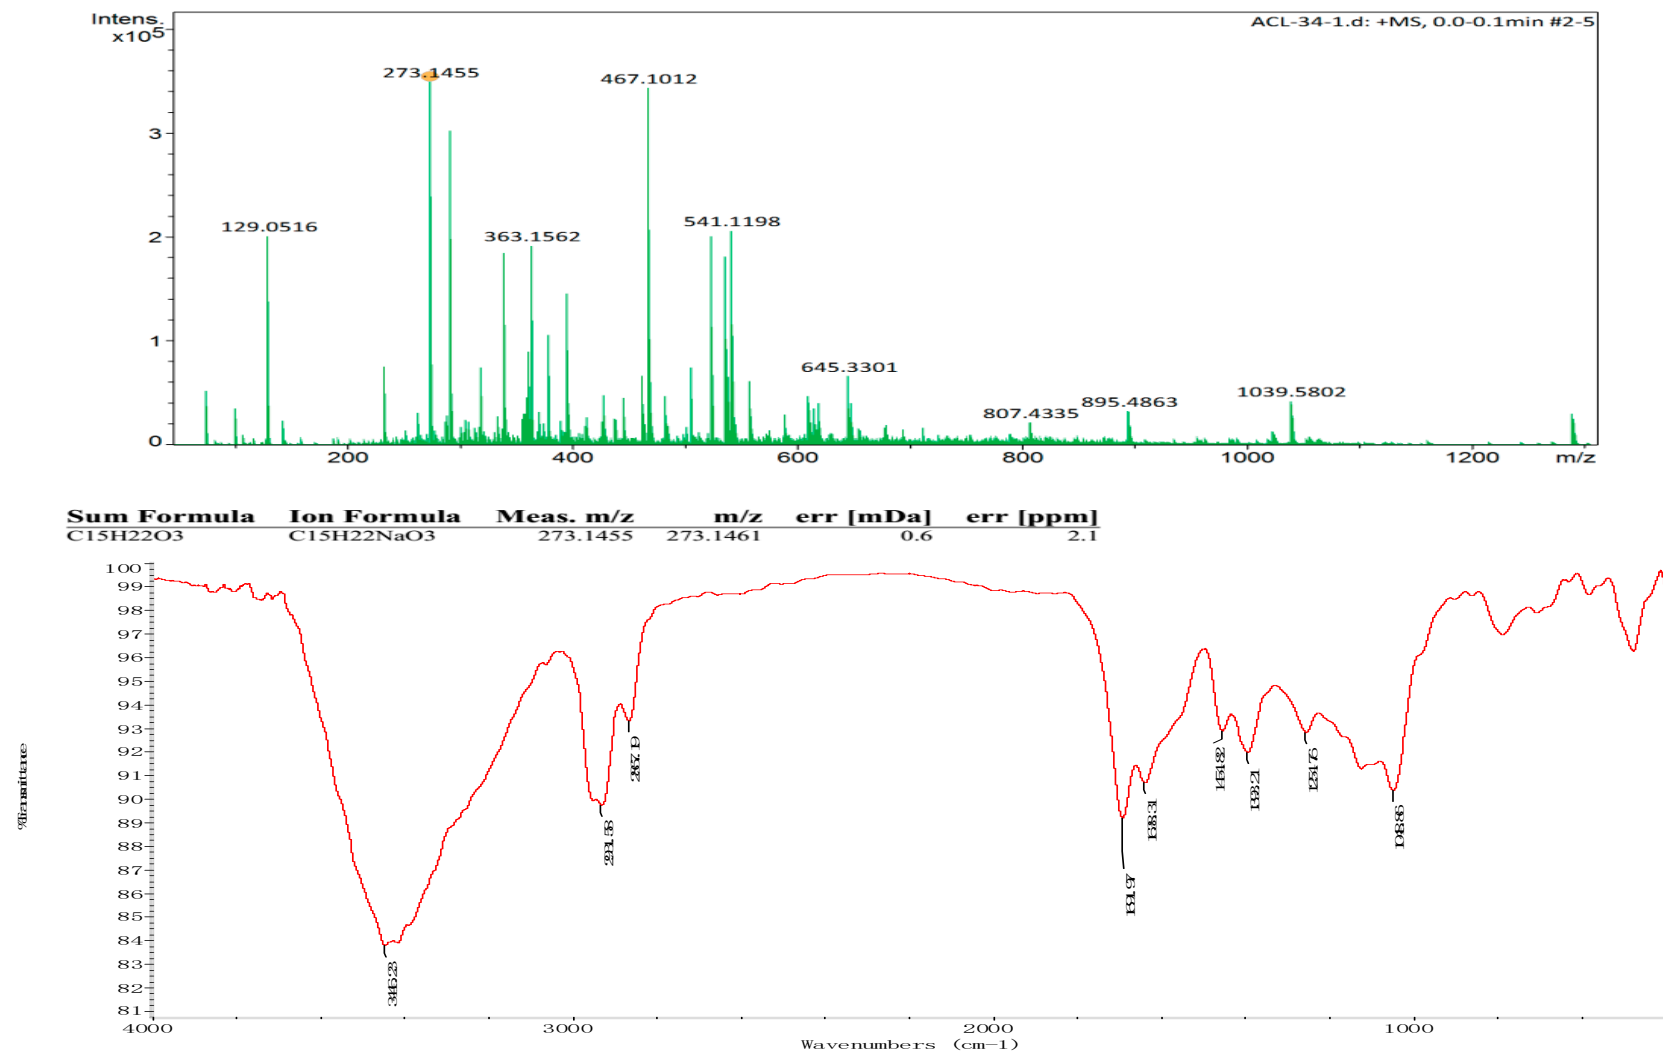

Figure S17. The  $^1\text{H}$  NMR spectrum of compound 3 in  $\text{CDCl}_3$

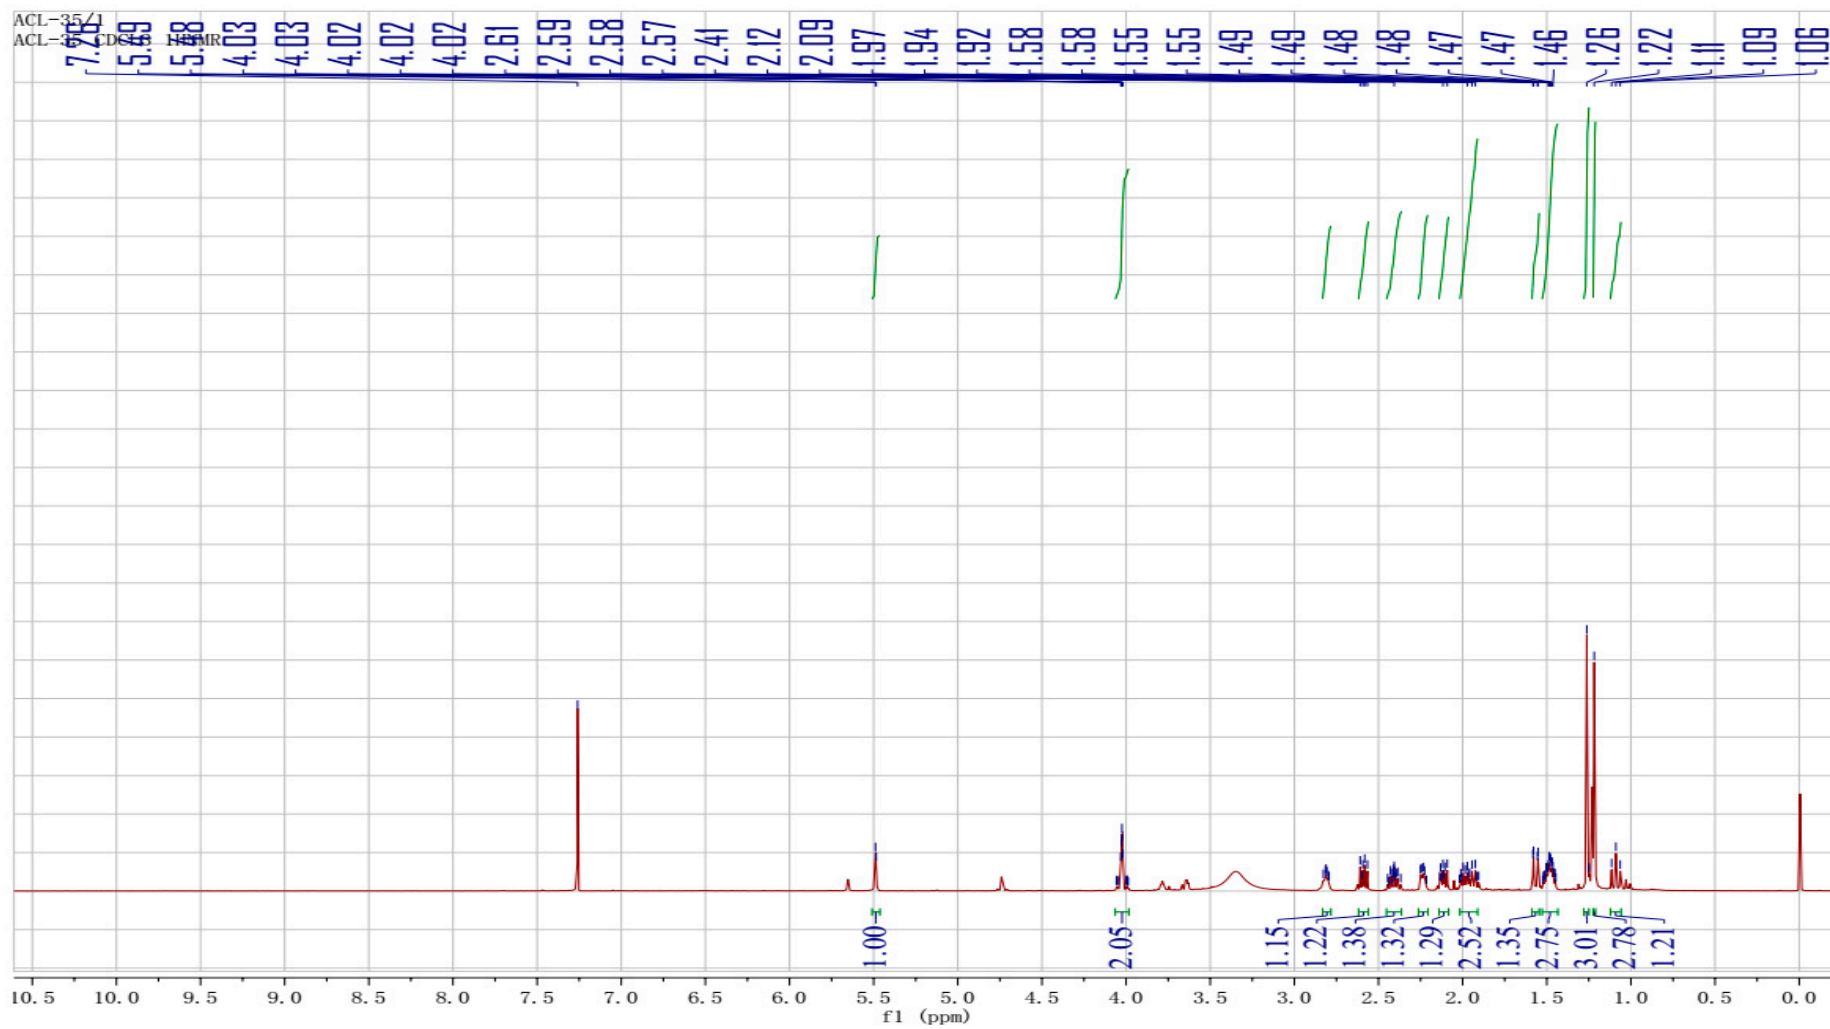

Figure S18. The  $^{13}\text{C}$ -NMR spectrum of compound 3 in  $\text{CDCl}_3$

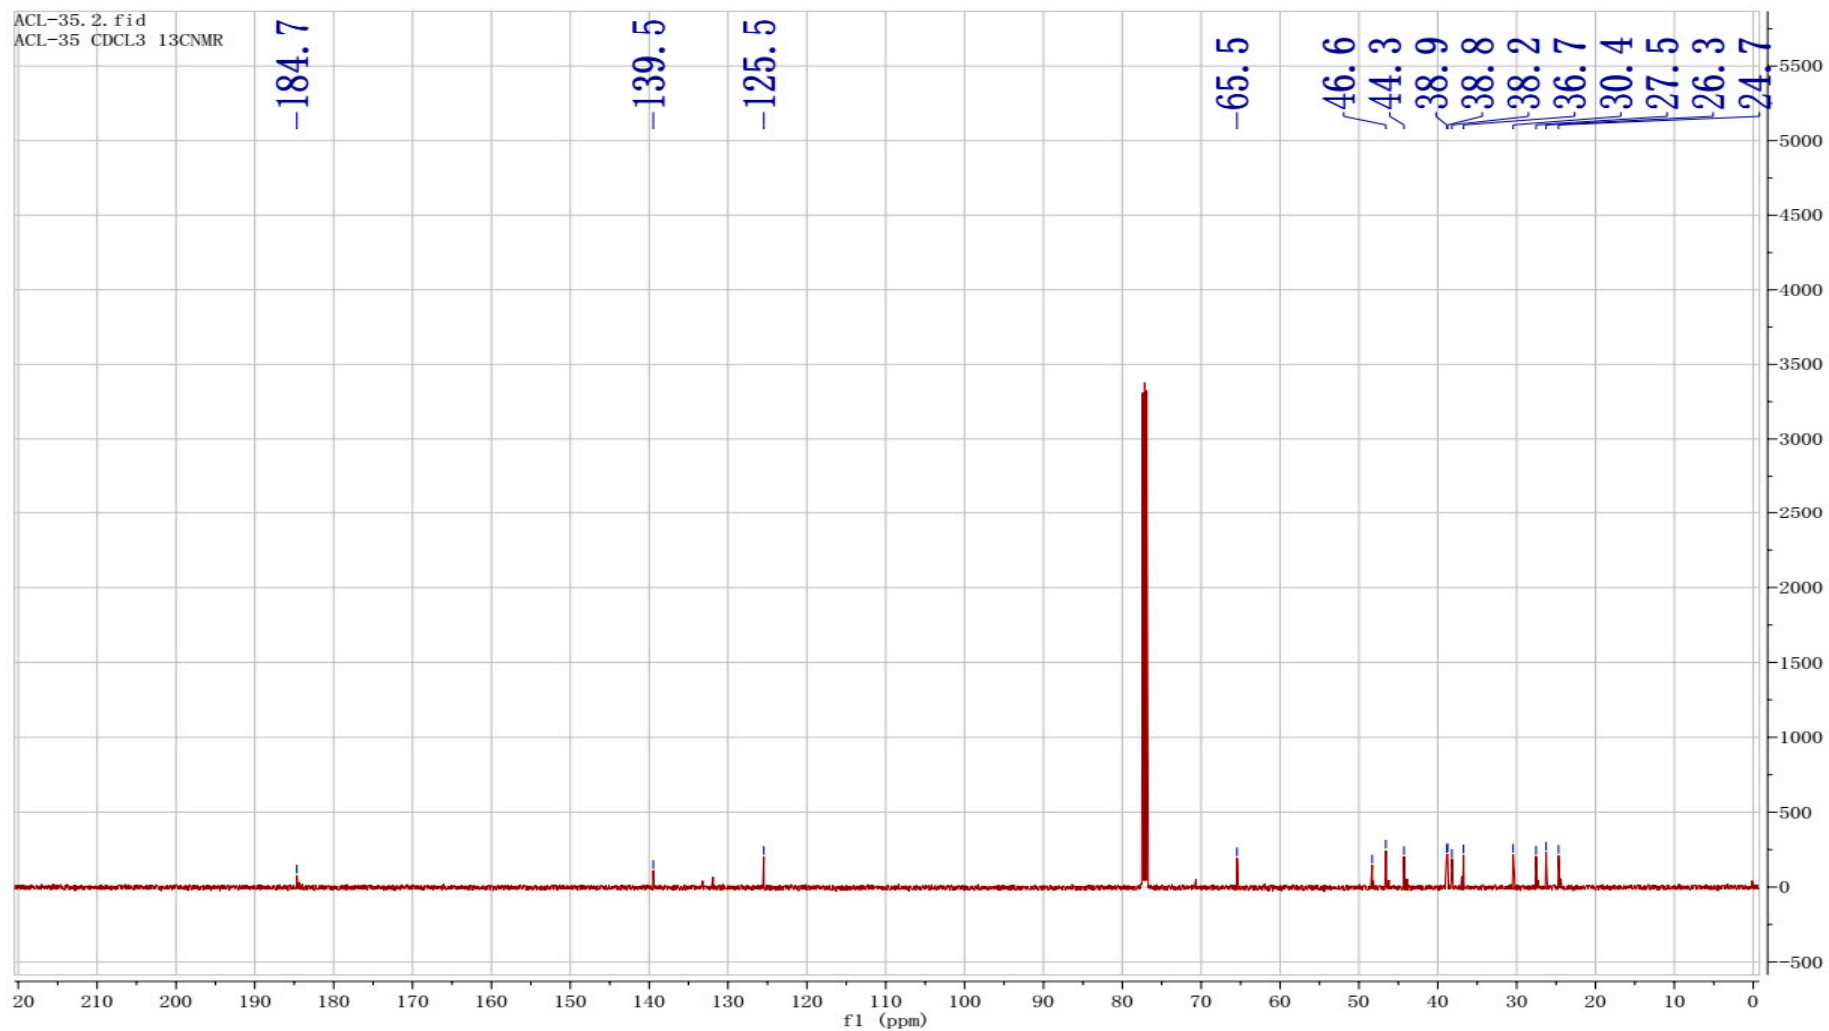

Figure S19. The DEPT spectrum of compound 3 in CDCl<sub>3</sub>

ACL-35. 3. fid  
ACL-35 CDCL3 DEPT135

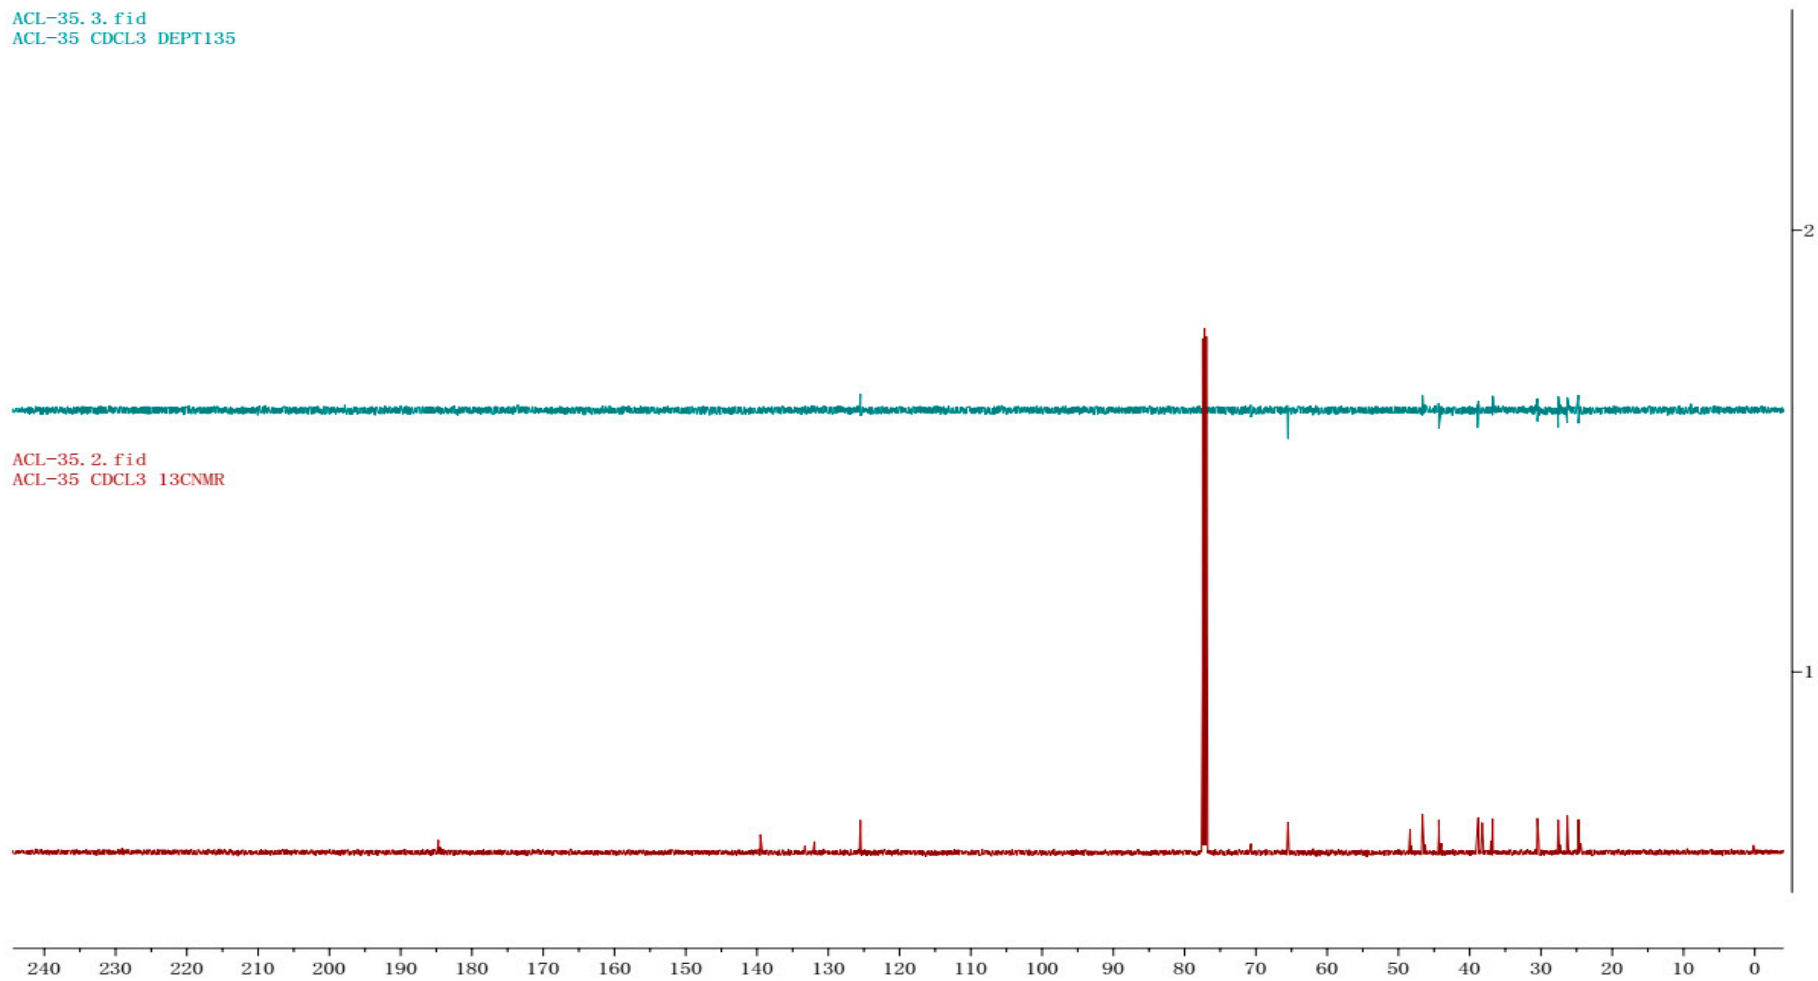



Figure S20. The HSQC spectrum of compound 3 in CDCl<sub>3</sub>

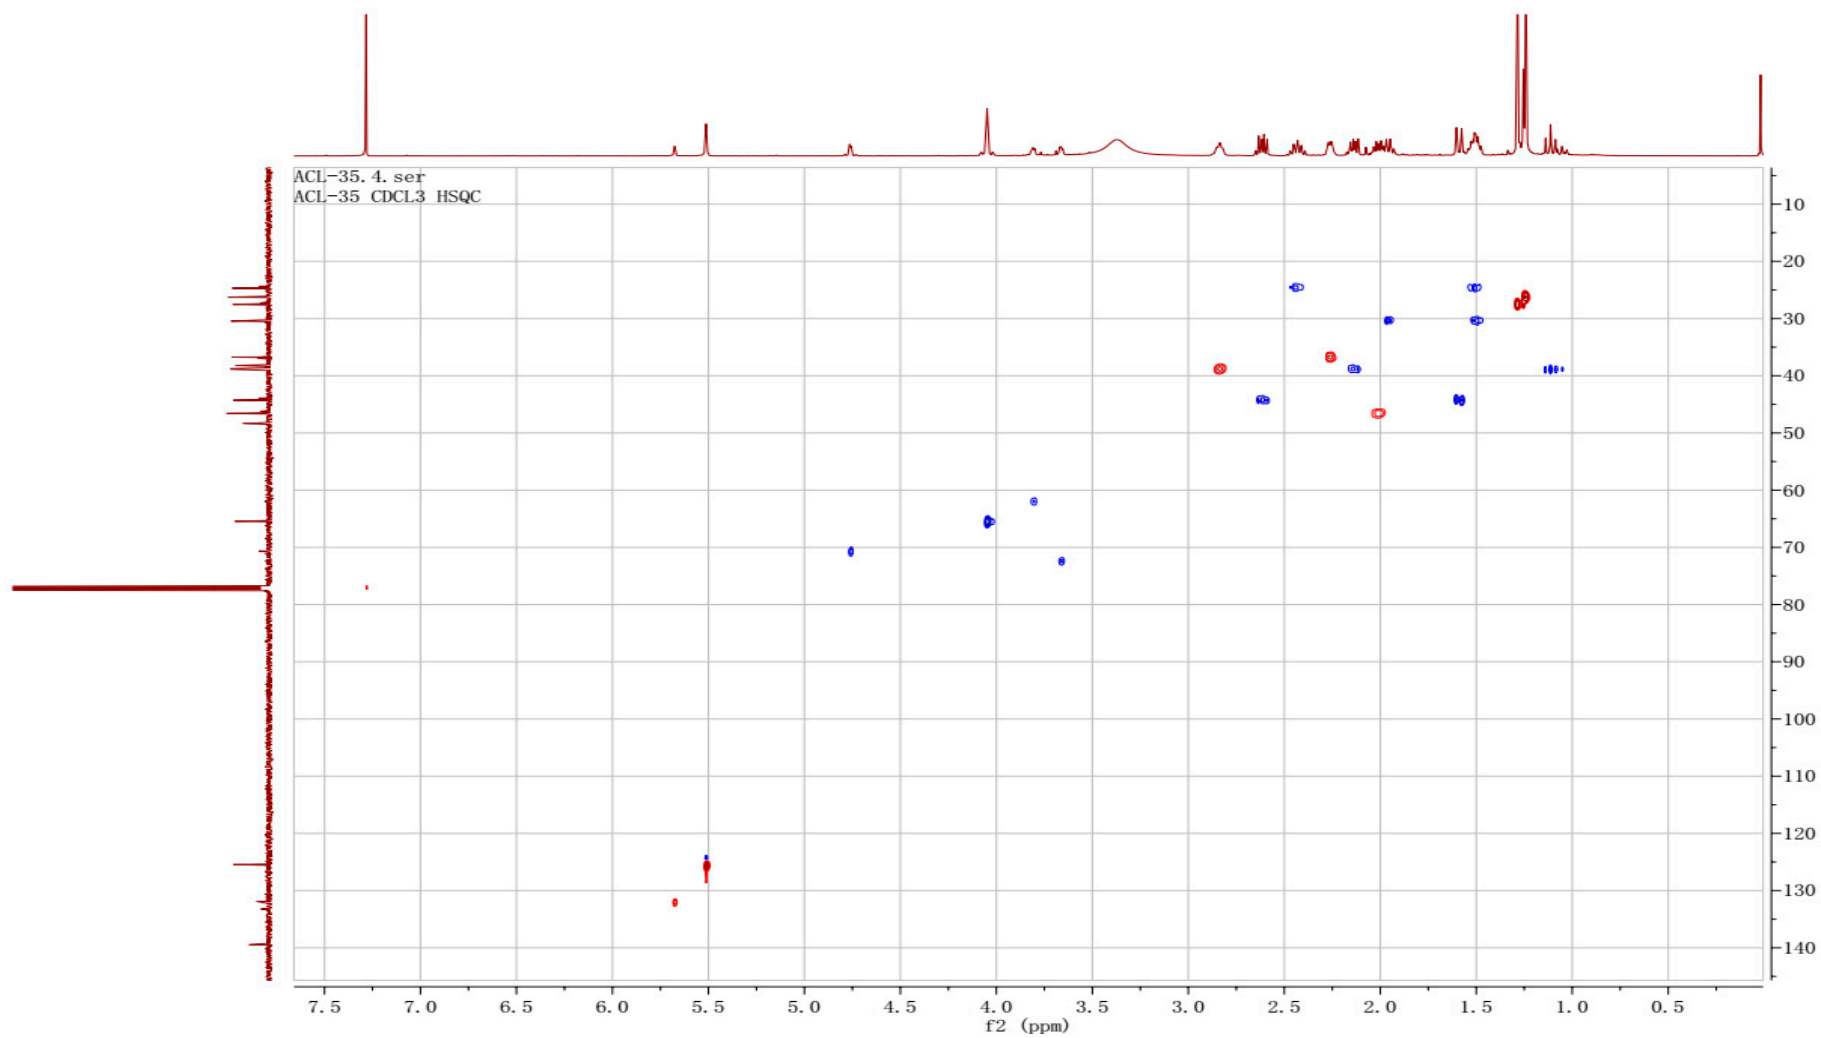

Figure S21. The  $^1\text{H}$ - $^1\text{H}$  COSY spectrum of compound 3 in  $\text{CDCl}_3$

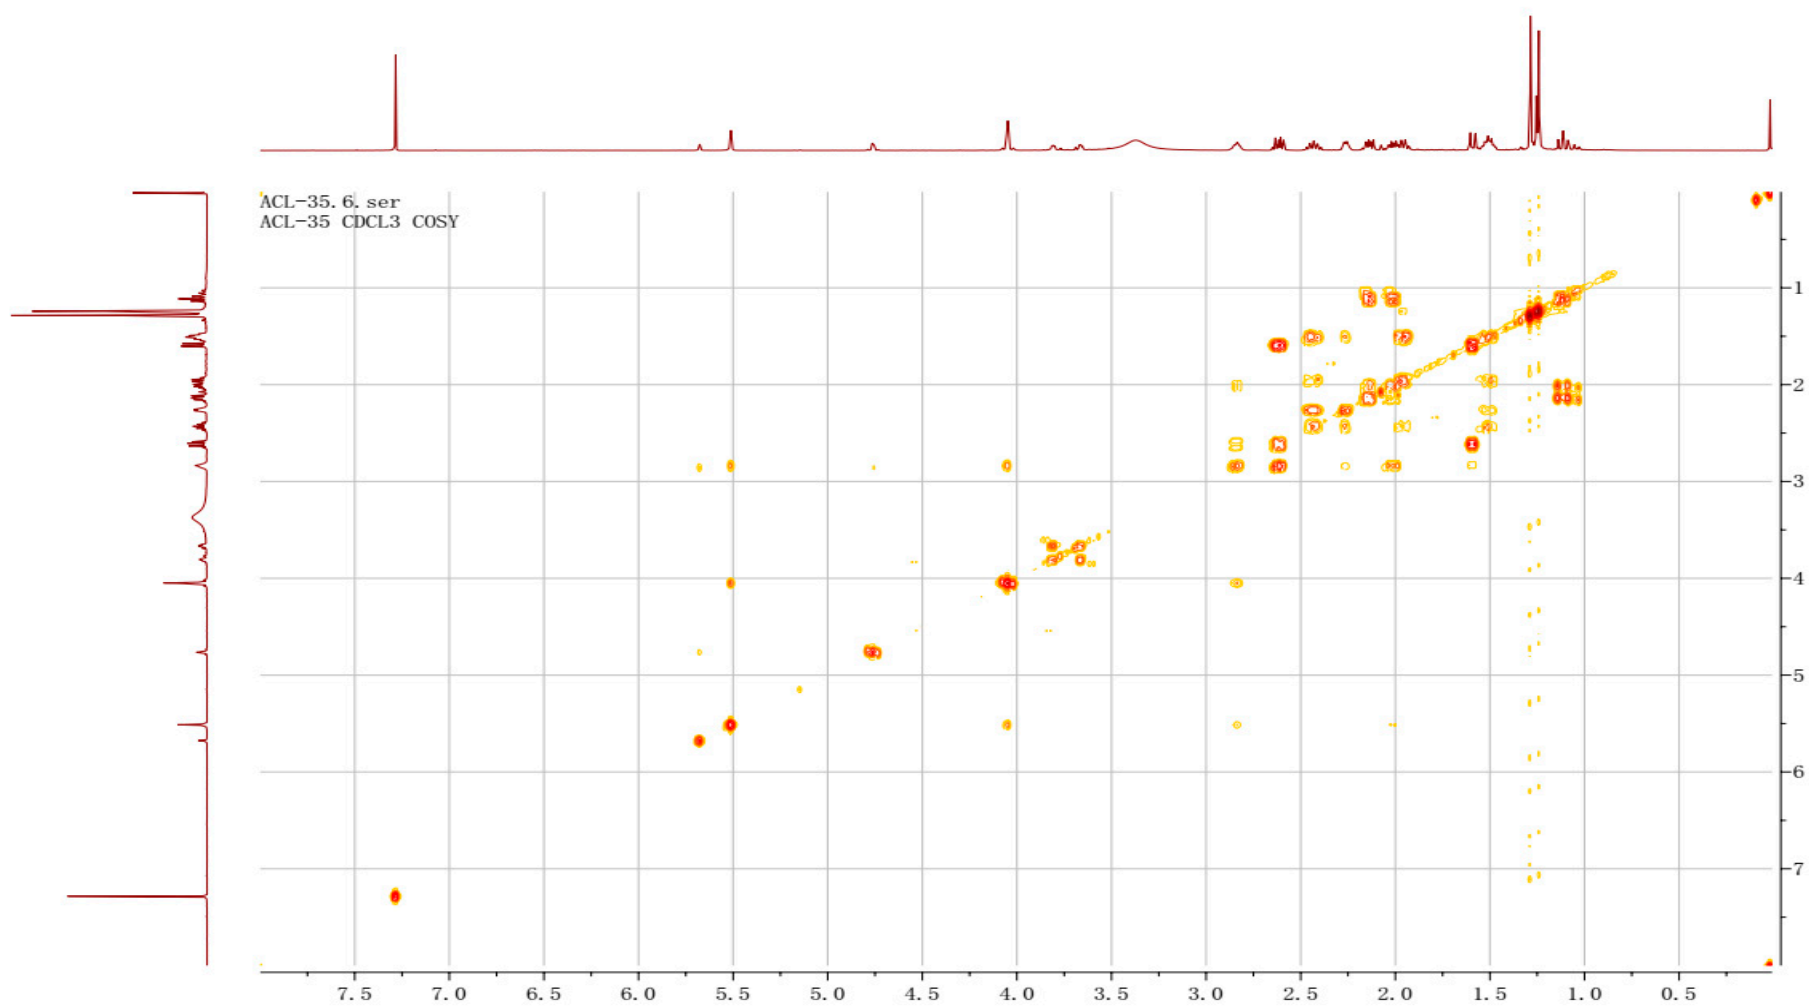

Figure S22. The HMBC spectrum of compound 3 in CDCl<sub>3</sub>

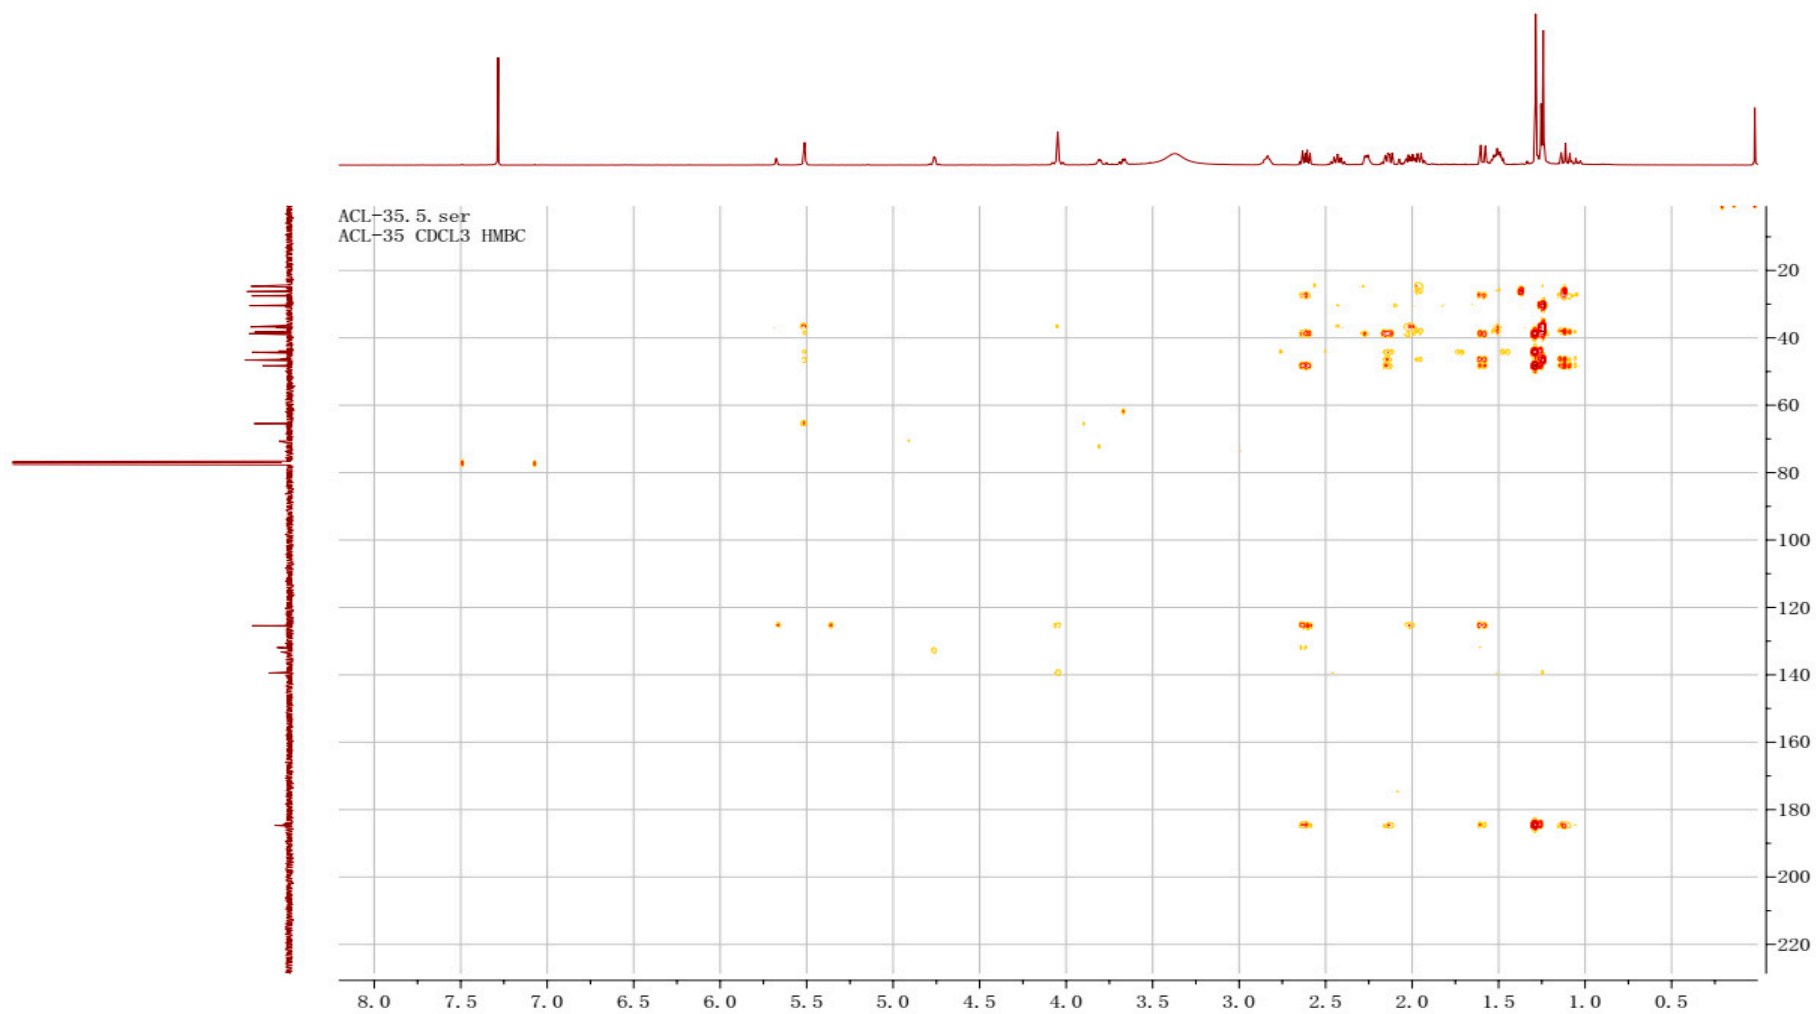

Figure S23. The ROESY spectrum of compound 3 in CDCl<sub>3</sub>

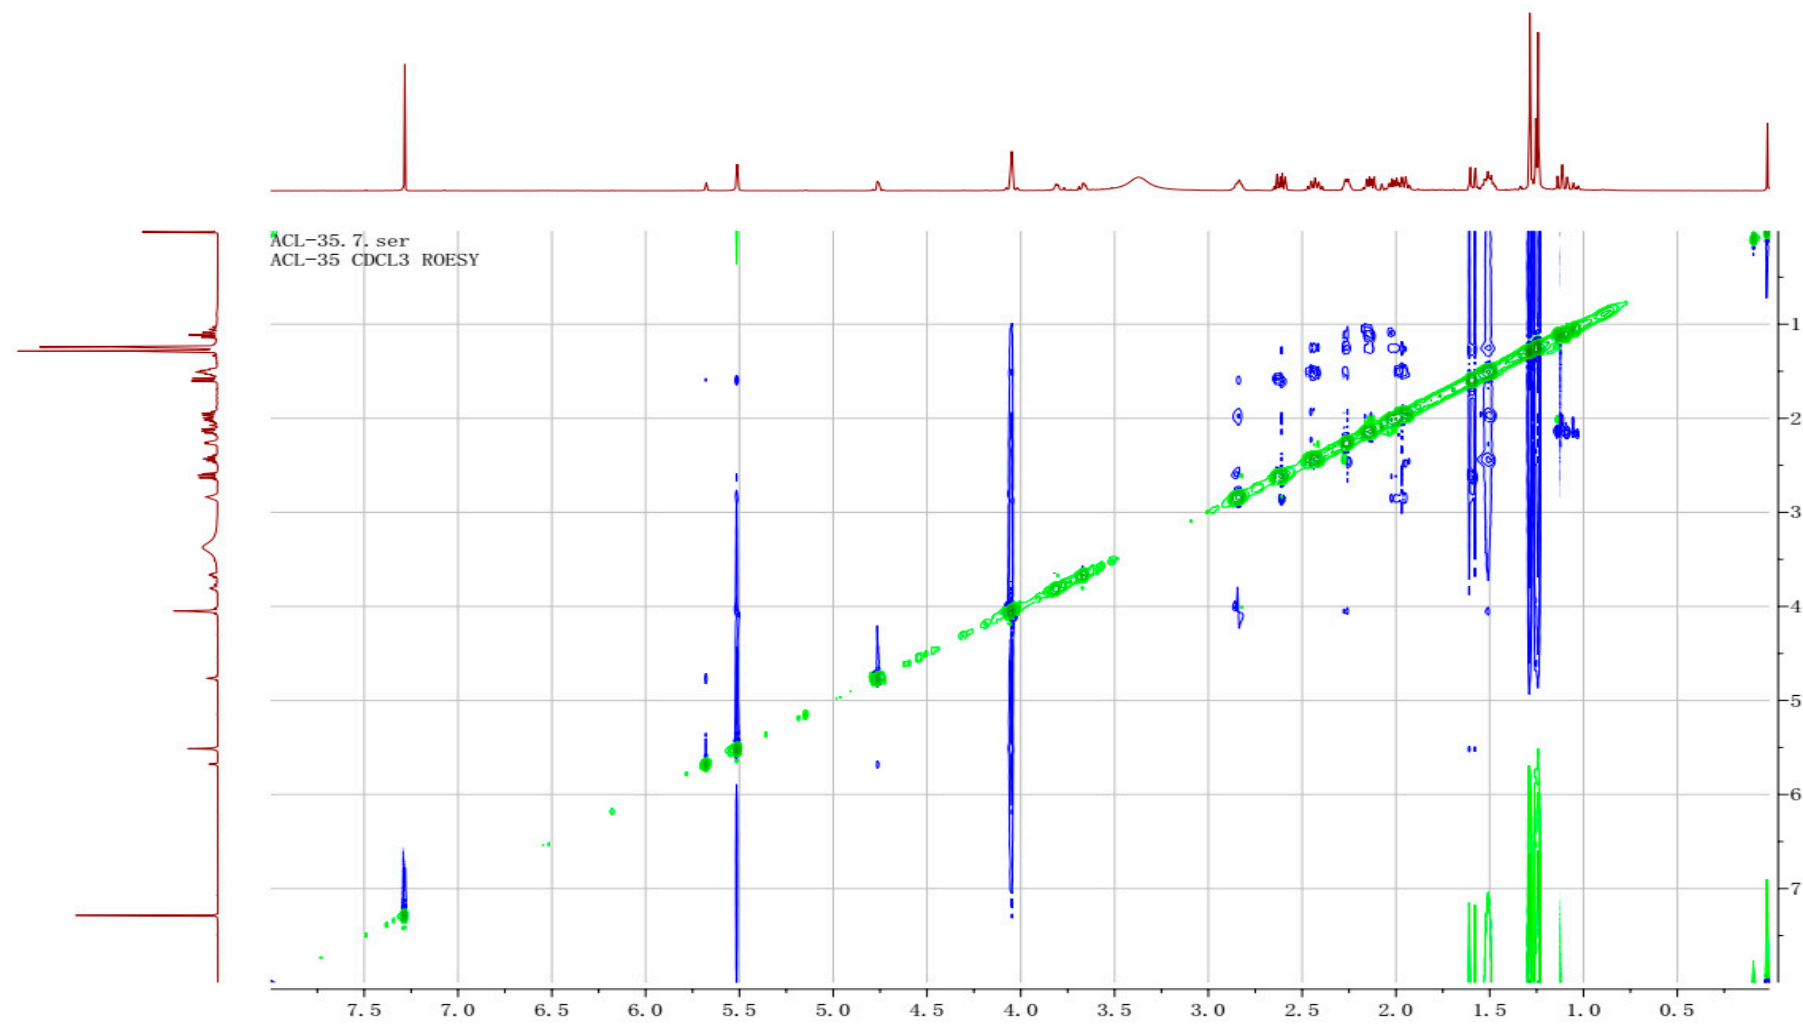

Figure S24. The HRESIMS and IR spectra of compound 3

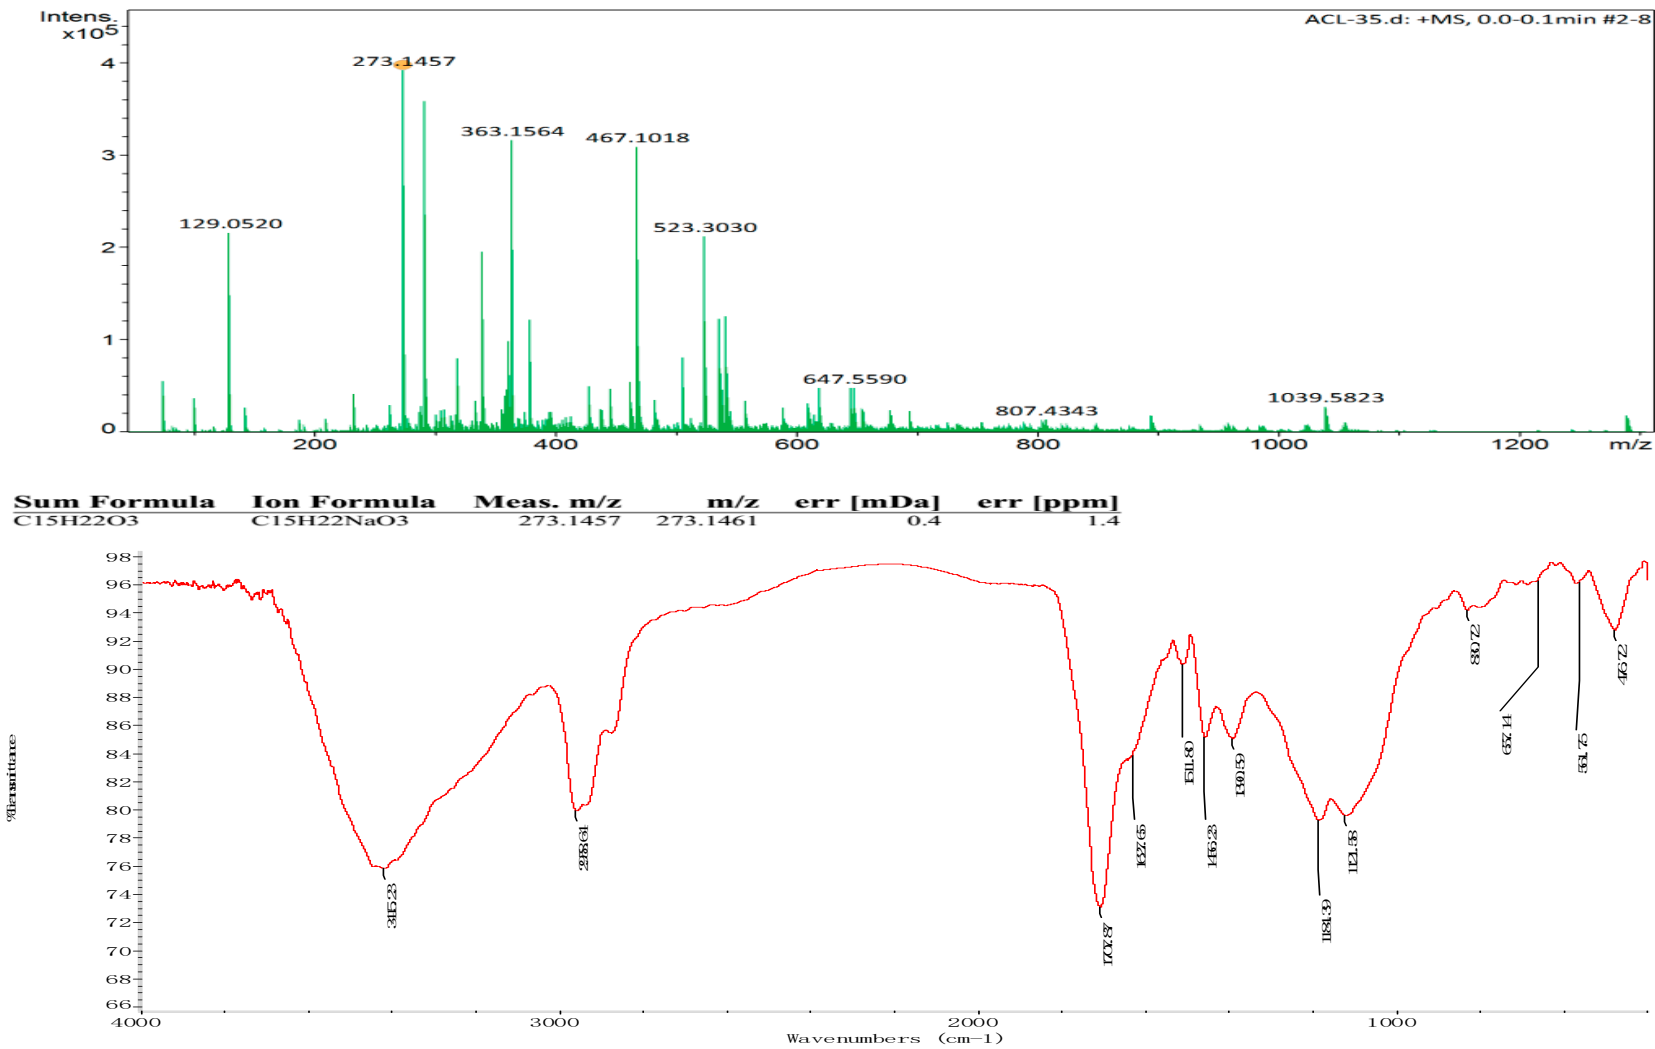

Figure S25. The  $^1\text{H}$  NMR spectrum of compound 4 in  $\text{CDCl}_3$

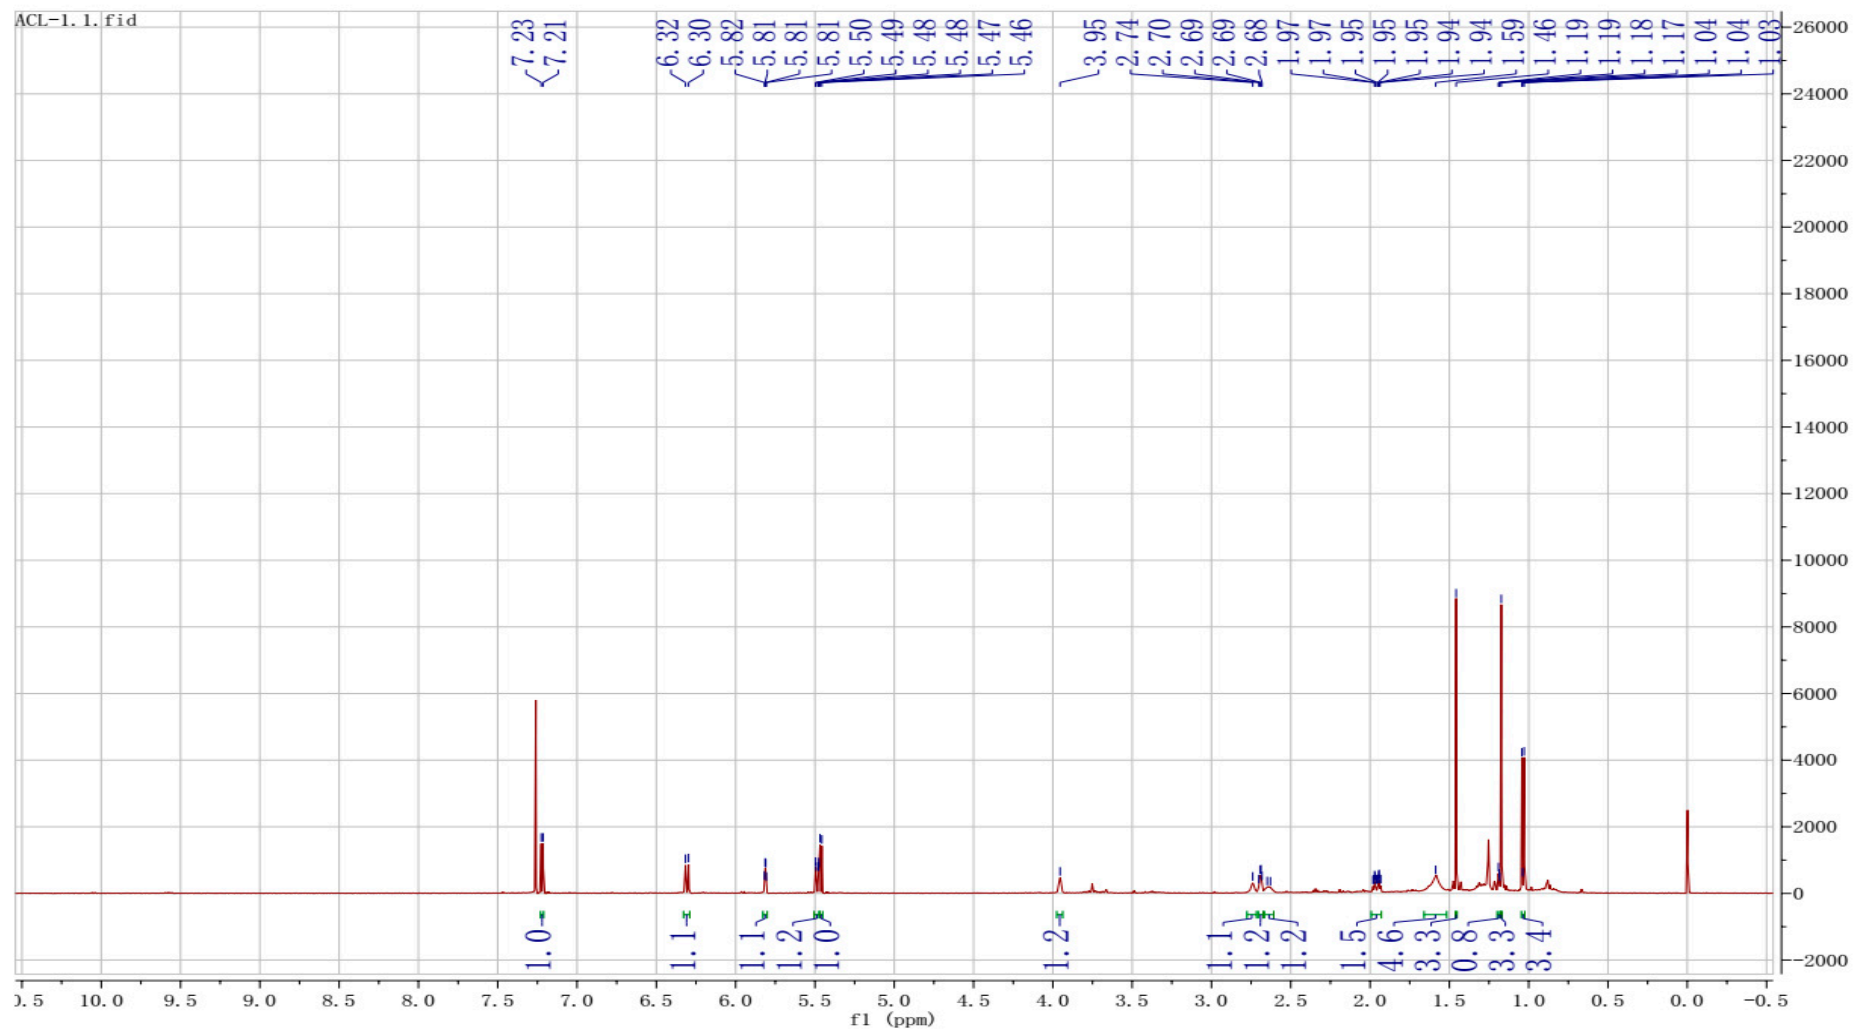

Figure S26. The  $^{13}\text{C}$ -NMR spectrum of compound 4 in  $\text{CDCl}_3$

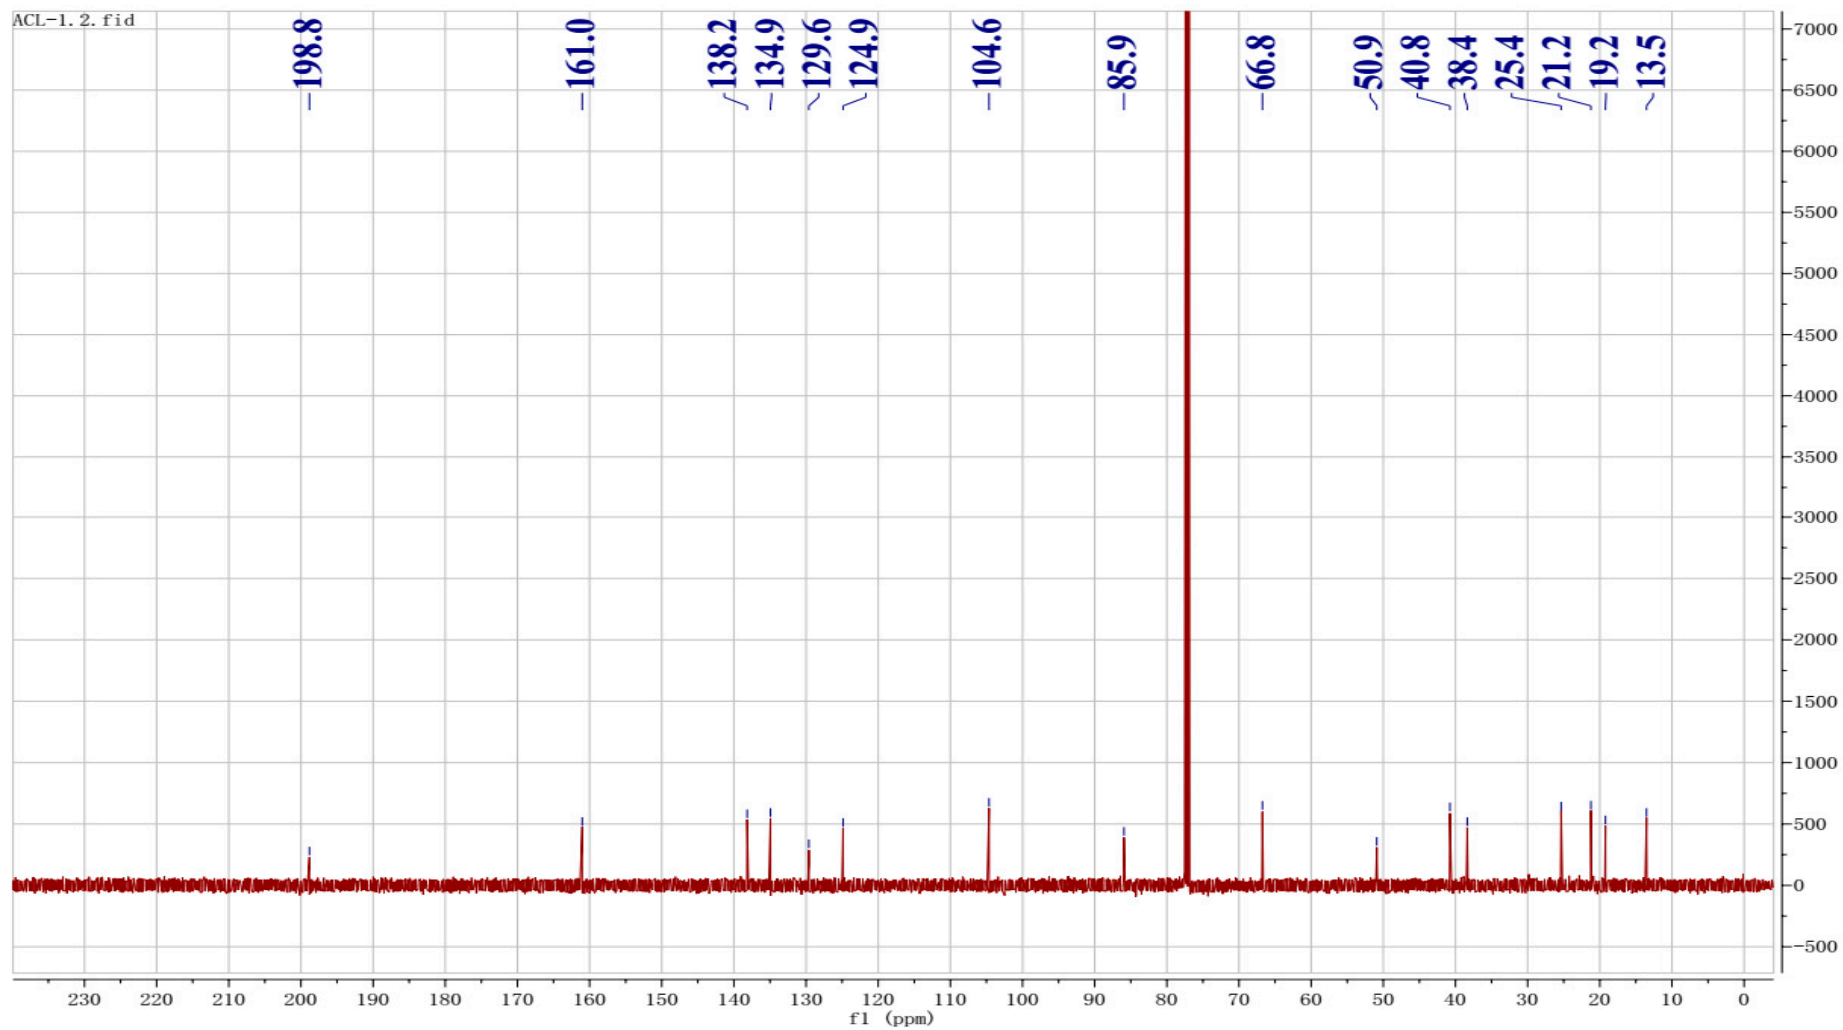

Figure S27. The DEPT spectrum of compound 4 in CDCl<sub>3</sub>

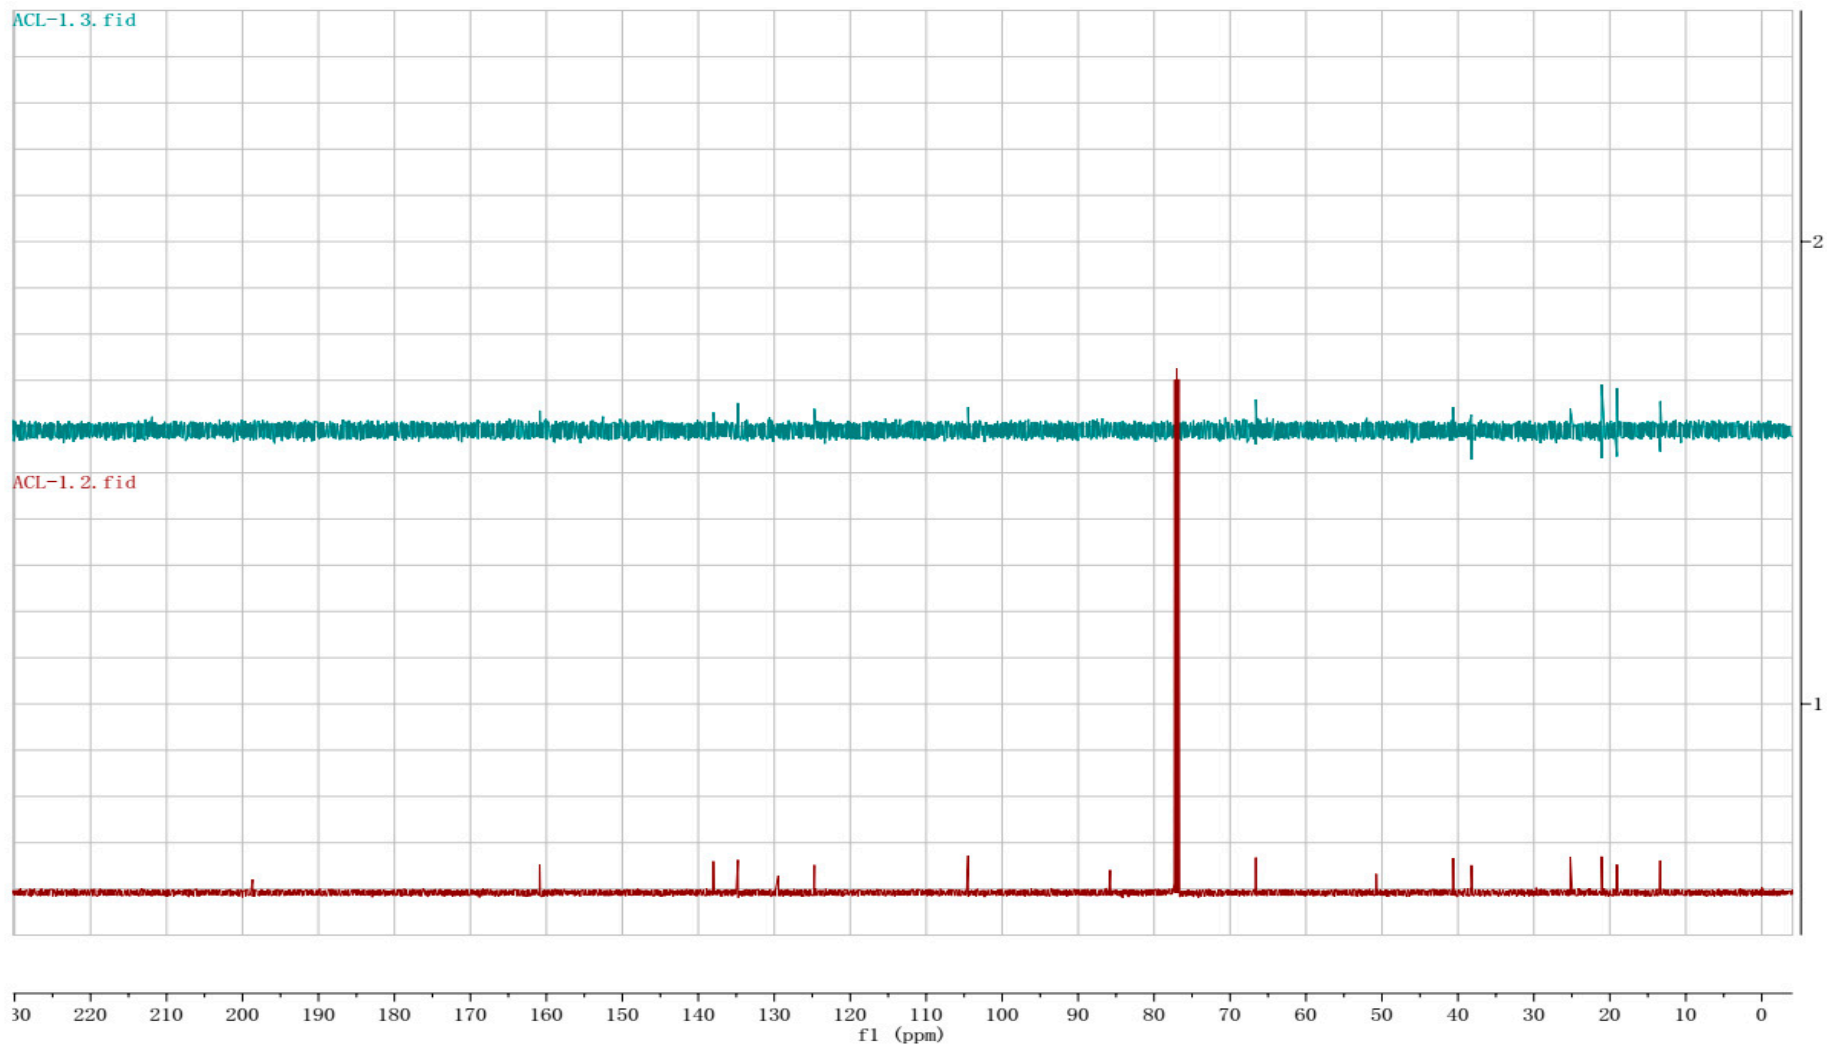



Figure S28. The HSQC spectrum of compound 4 in CDCl<sub>3</sub>

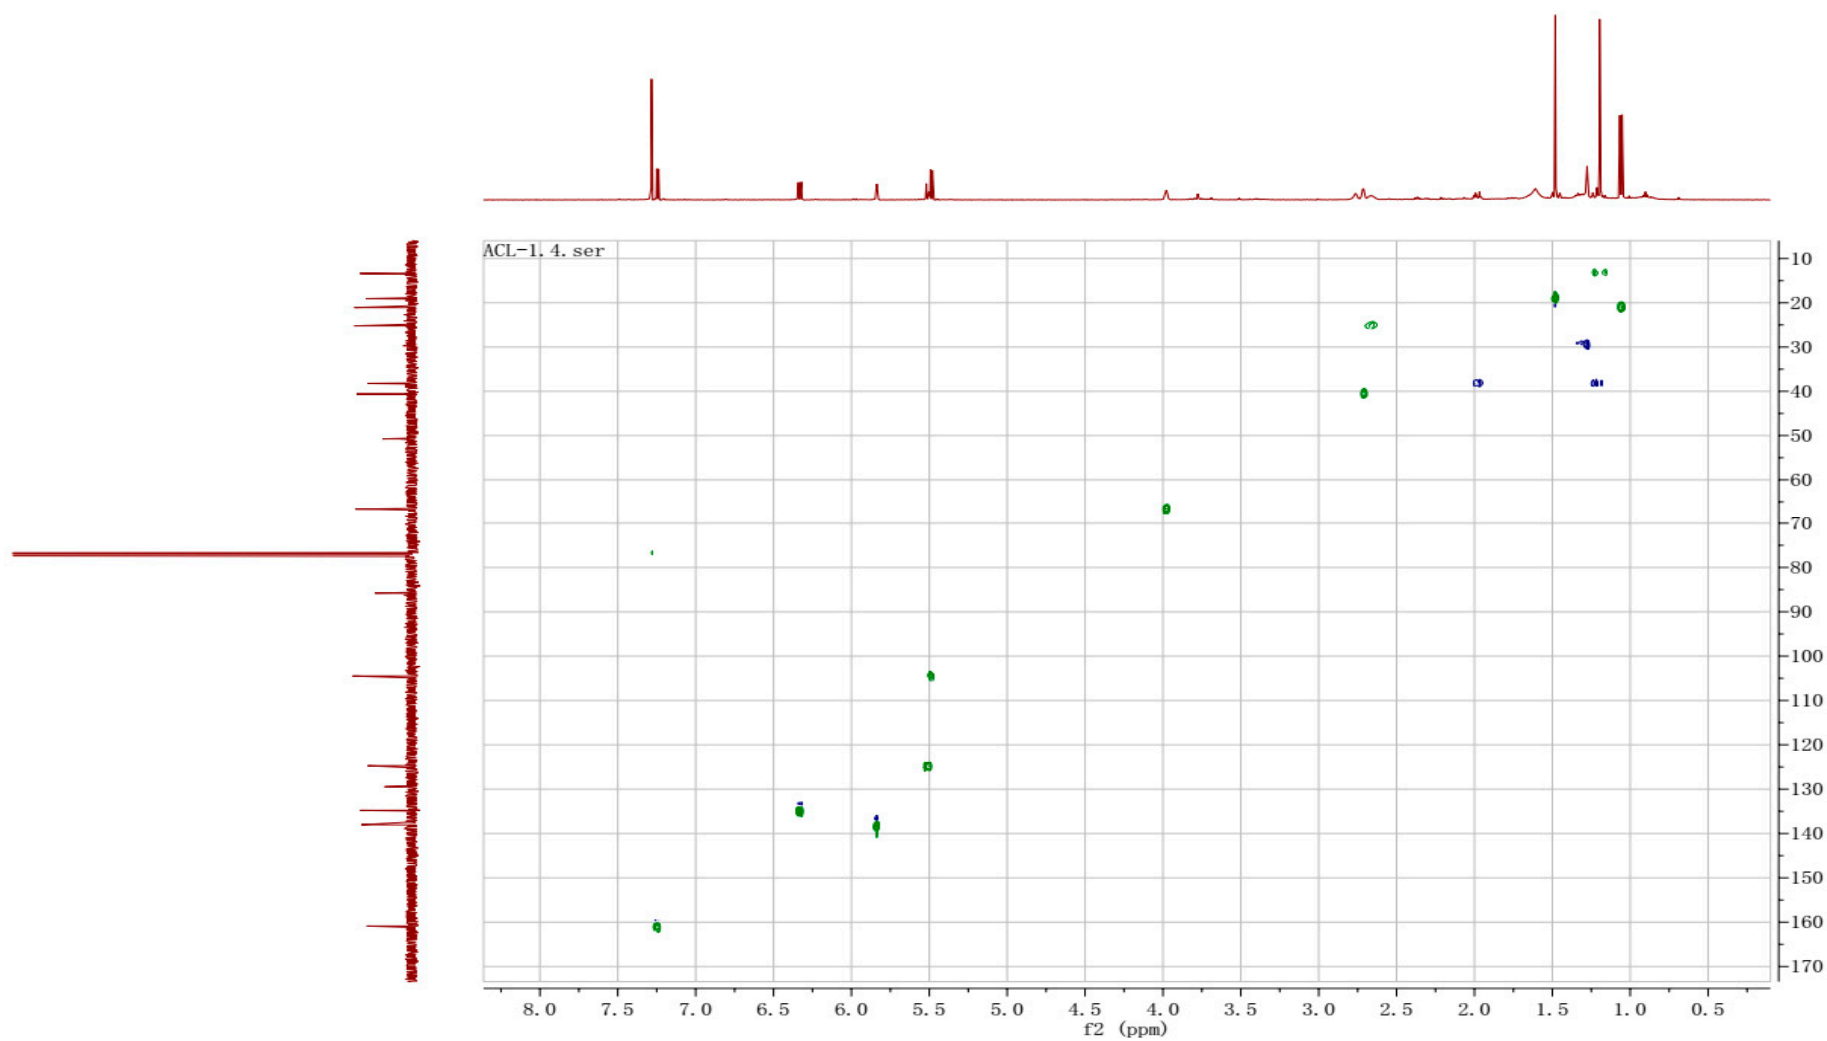

Figure S29. The  $^1\text{H}$ - $^1\text{H}$  COSY spectrum of compound 4 in  $\text{CDCl}_3$

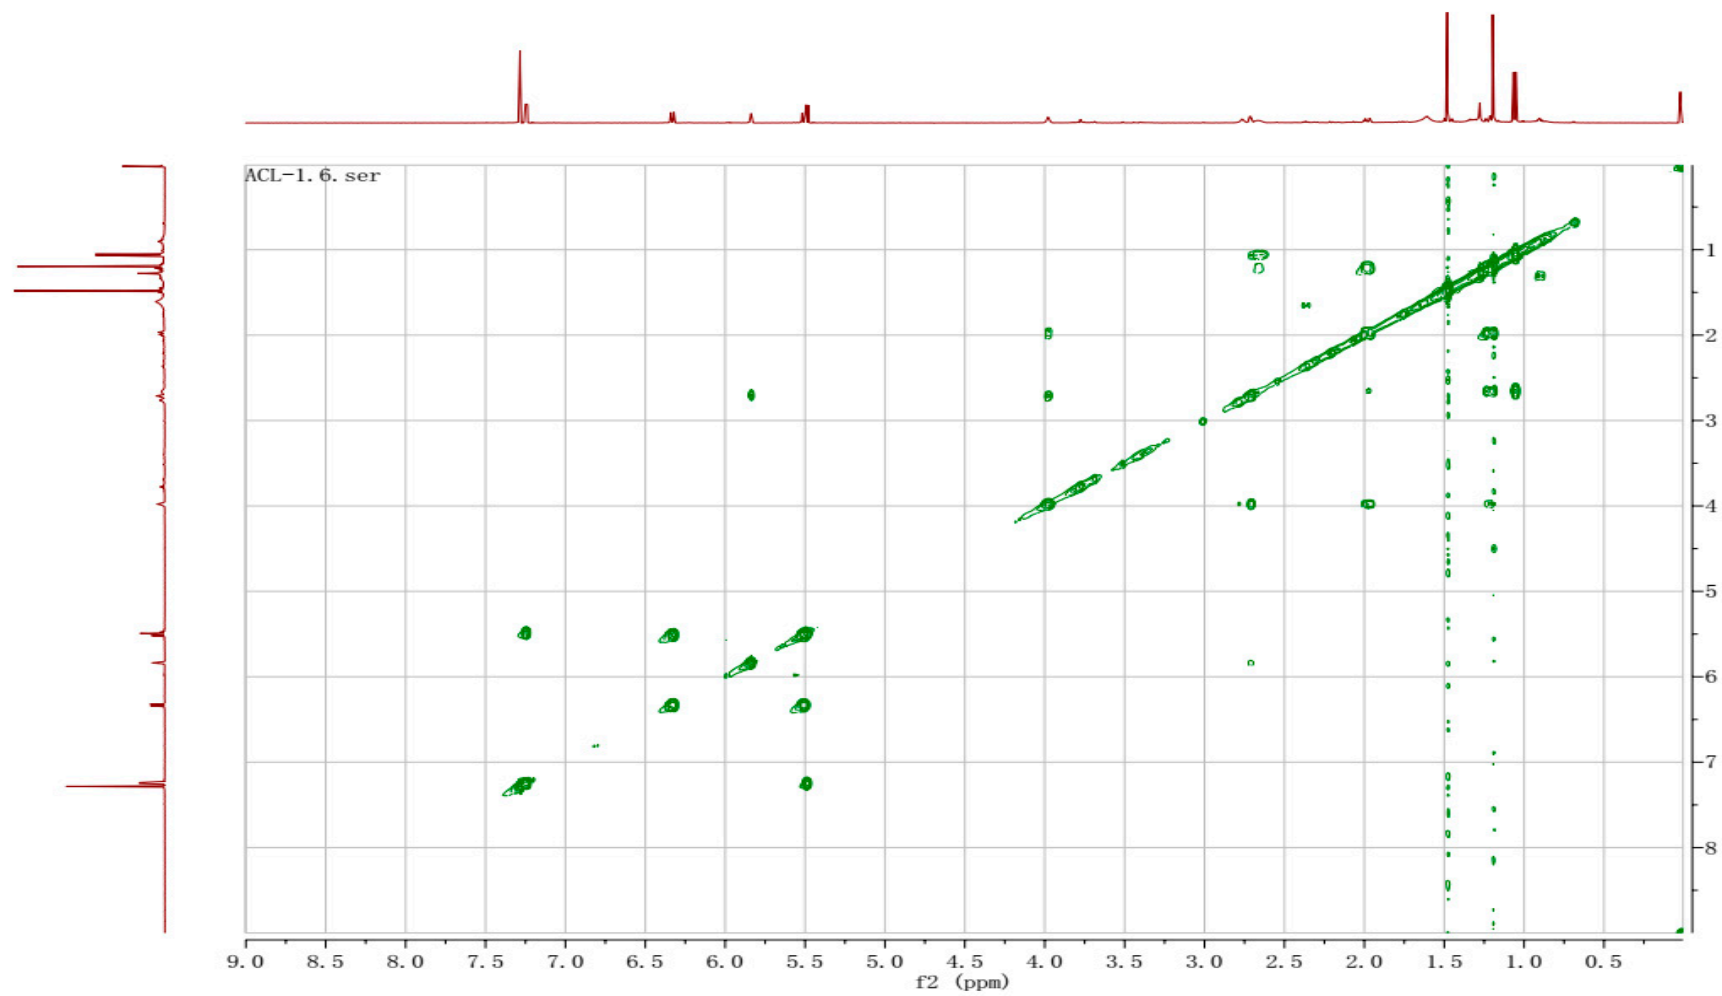

Figure S30. The HMBC spectrum of compound 4 in CDCl<sub>3</sub>

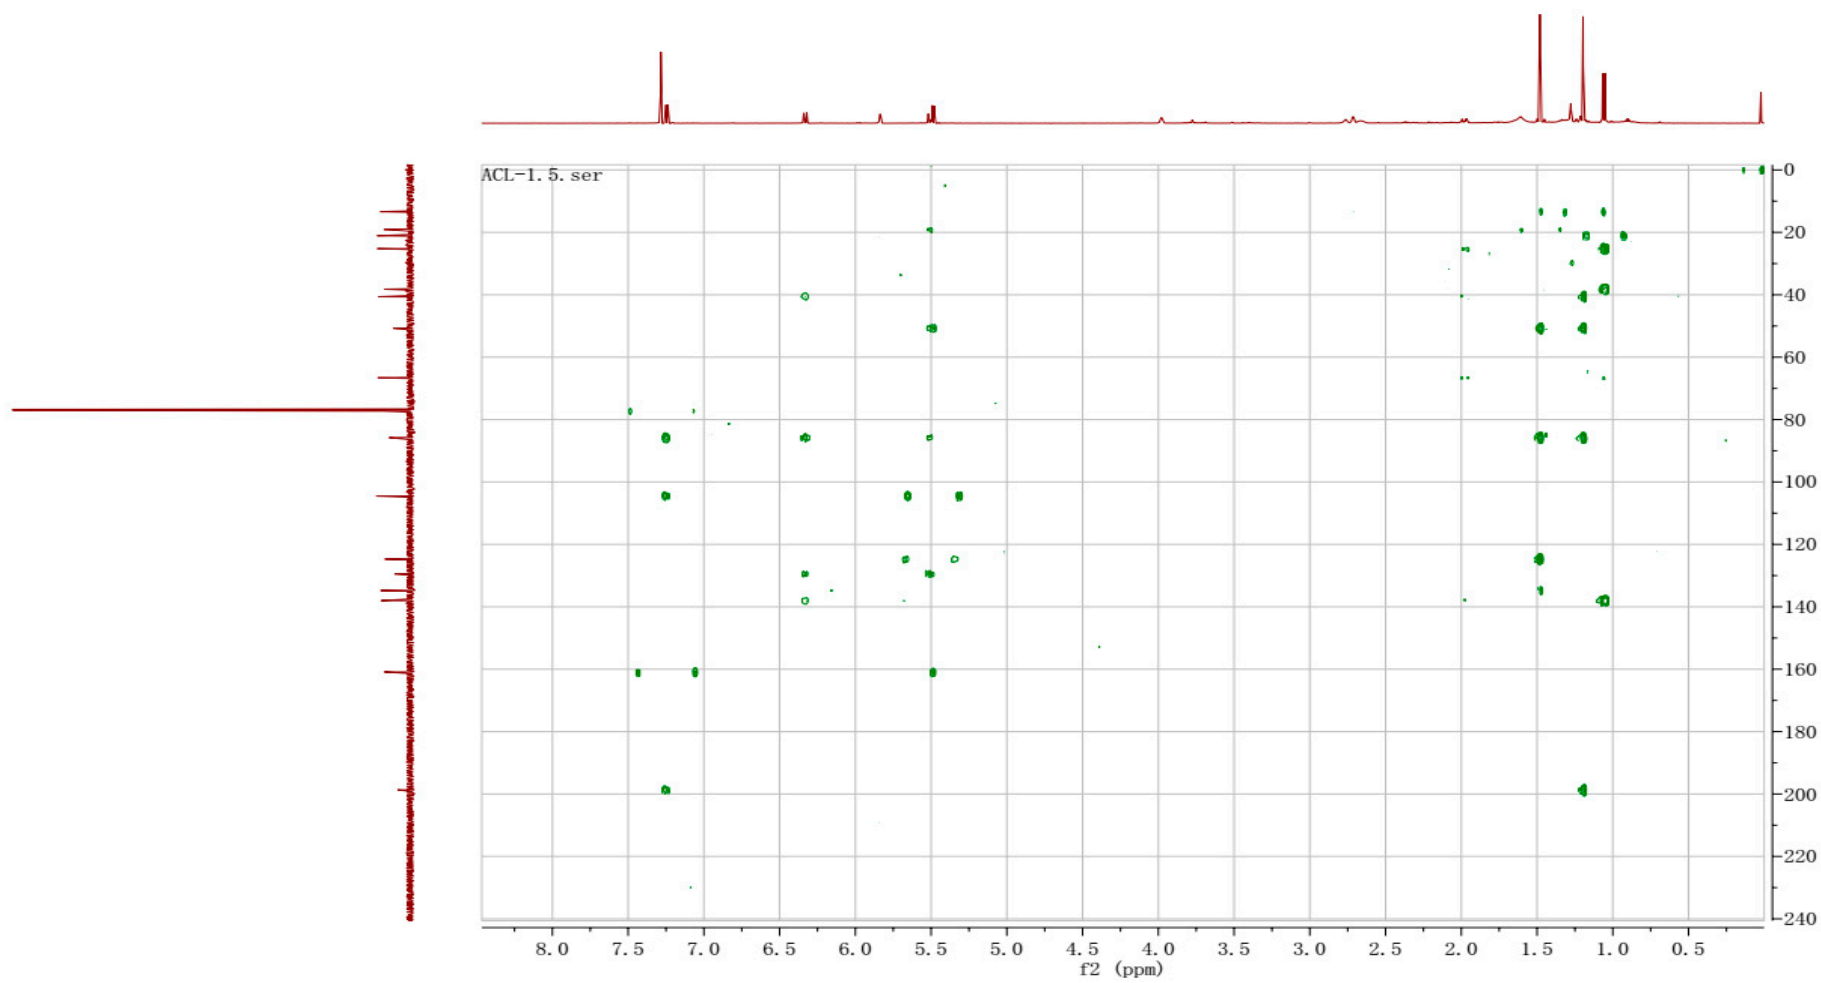

Figure S31. The ROESY spectrum of compound 4 in CDCl<sub>3</sub>

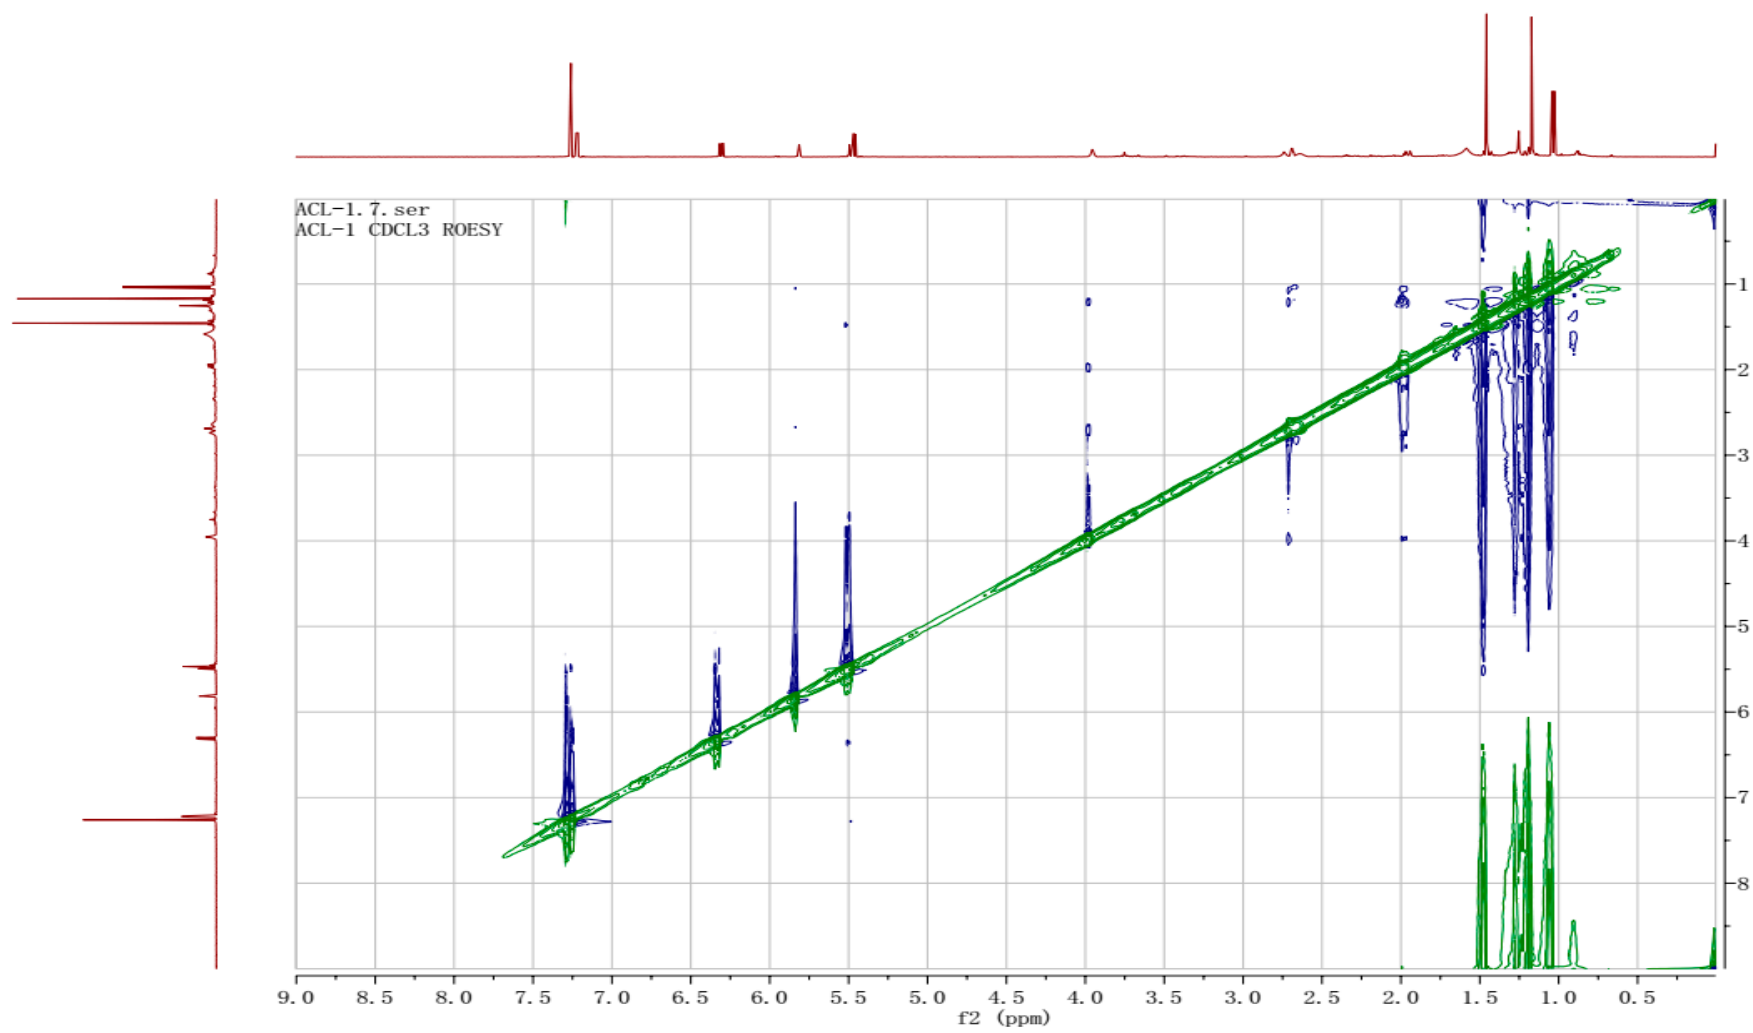

Figure S32. The HRESIMS and IR spectra of compound 4

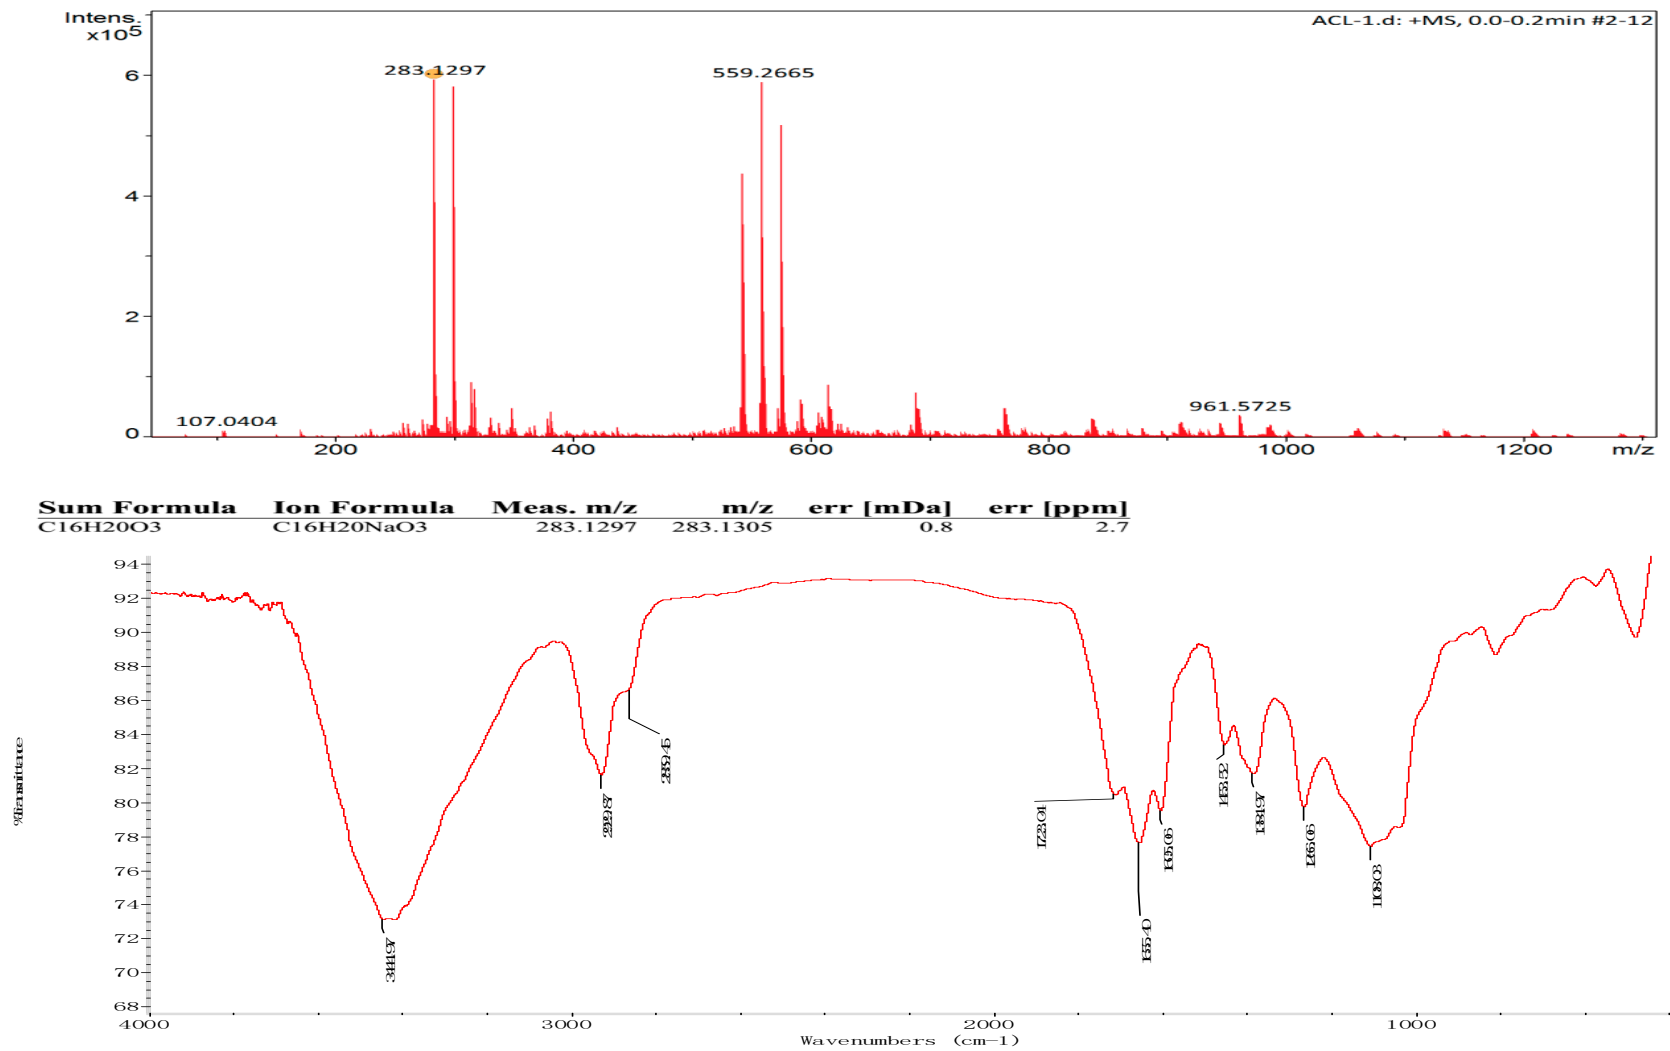

Figure S33. The  $^1\text{H}$  NMR spectrum of compound 5 in  $\text{CDCl}_3$

ACL-18. 1. fid  
ACL-18.  $\text{CDCl}_3$   $^1\text{H}$ NMR

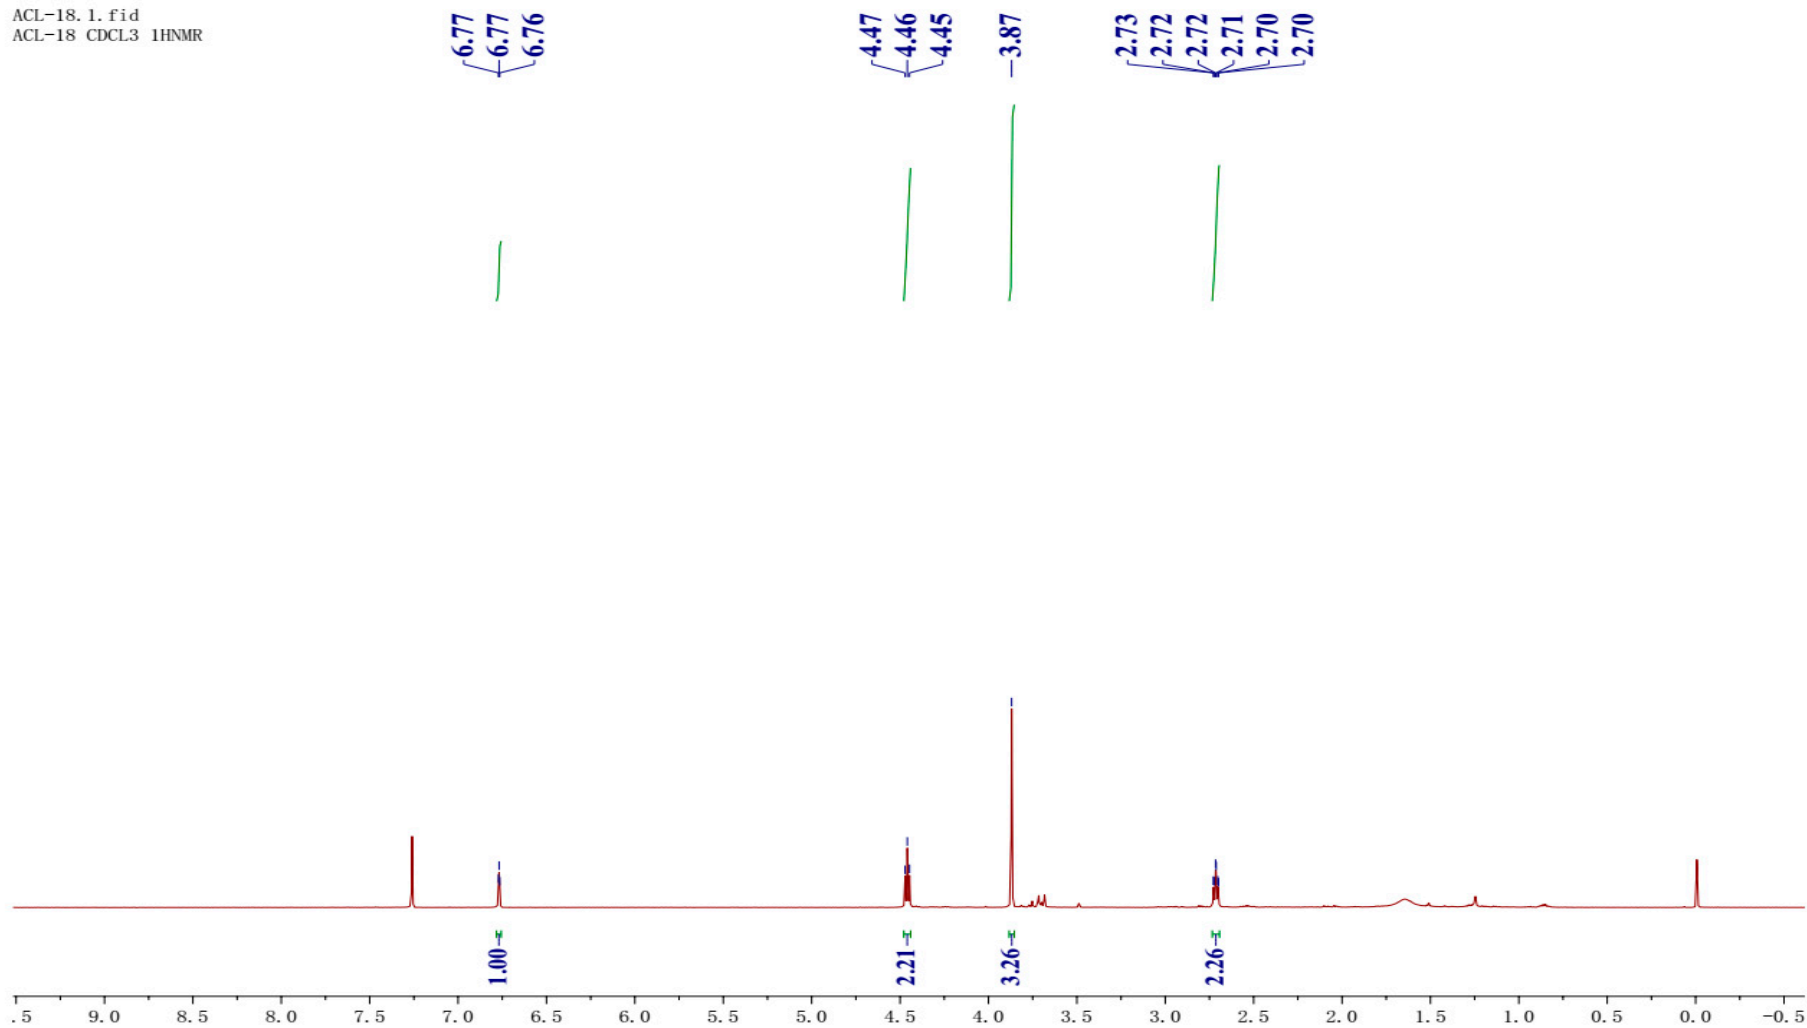

Figure S34. The  $^{13}\text{C}$ -NMR spectrum of compound 5 in  $\text{CDCl}_3$

ACL-18. 2. fid  
ACL-18 CDCL3 13CNMR

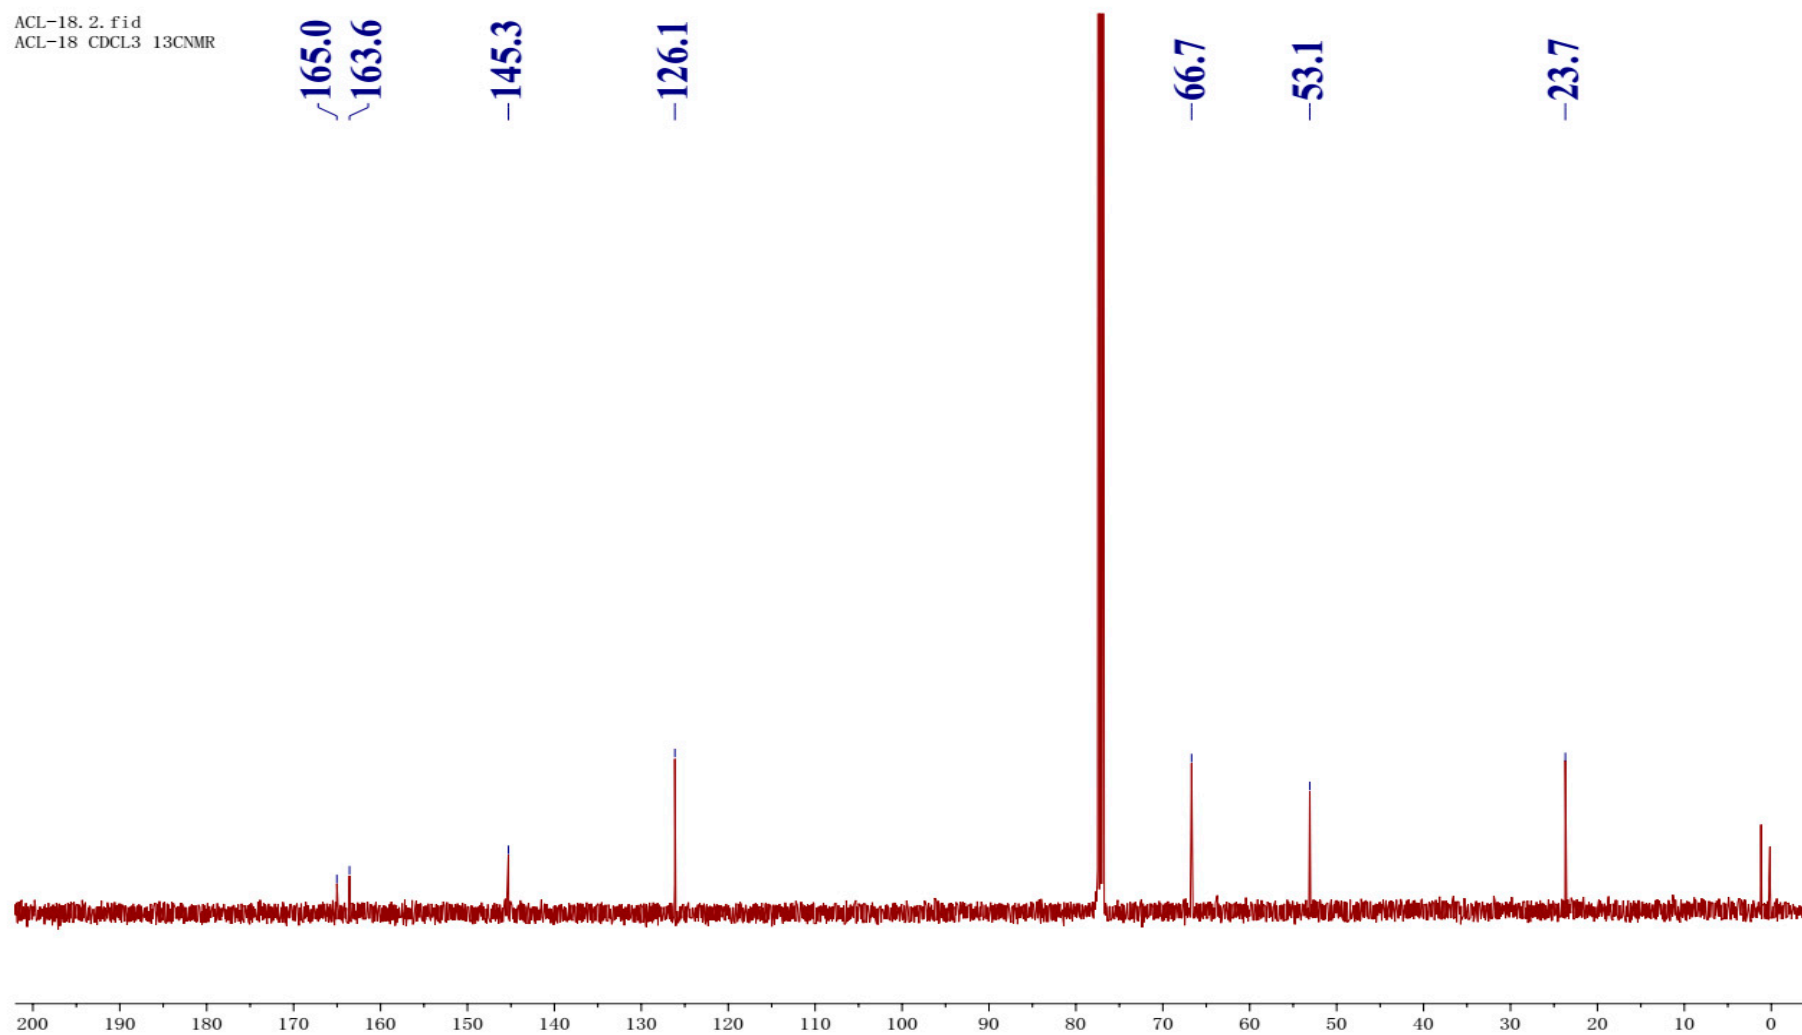

Figure S35. The DEPT spectrum of compound 5 in CDCl<sub>3</sub>

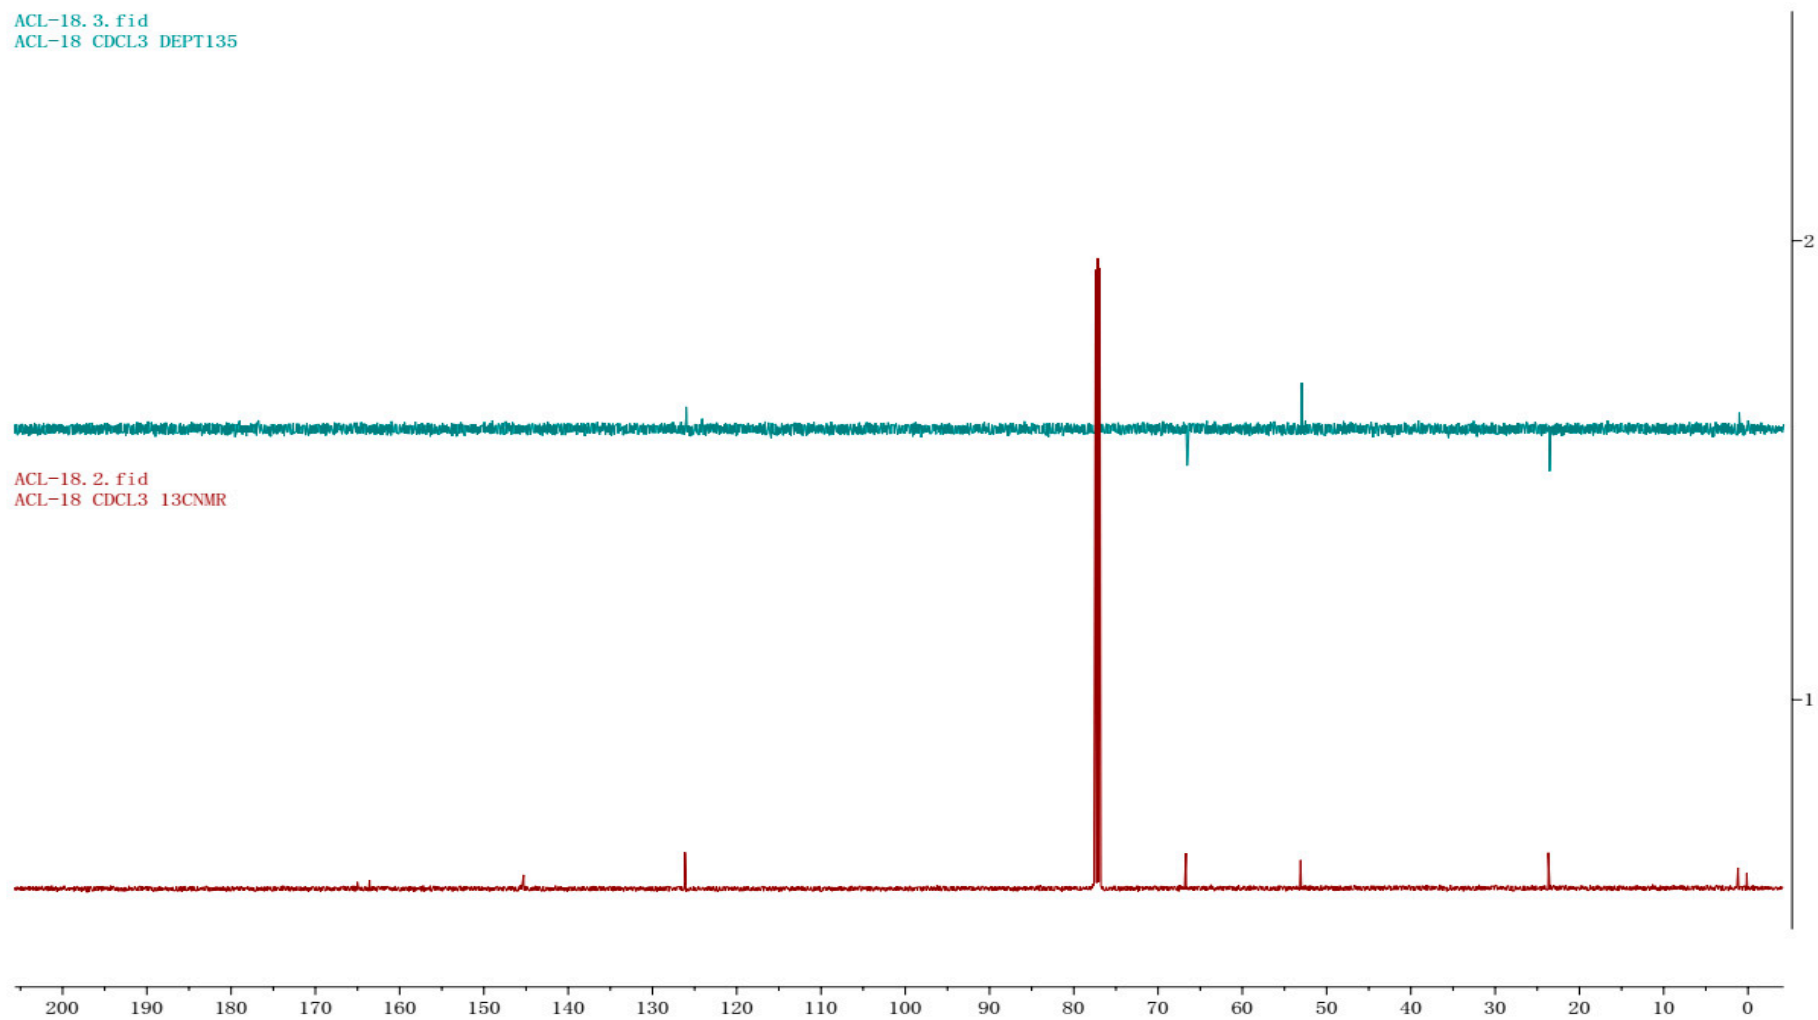



Figure S36. The HSQC spectrum of compound 5 in CDCl<sub>3</sub>

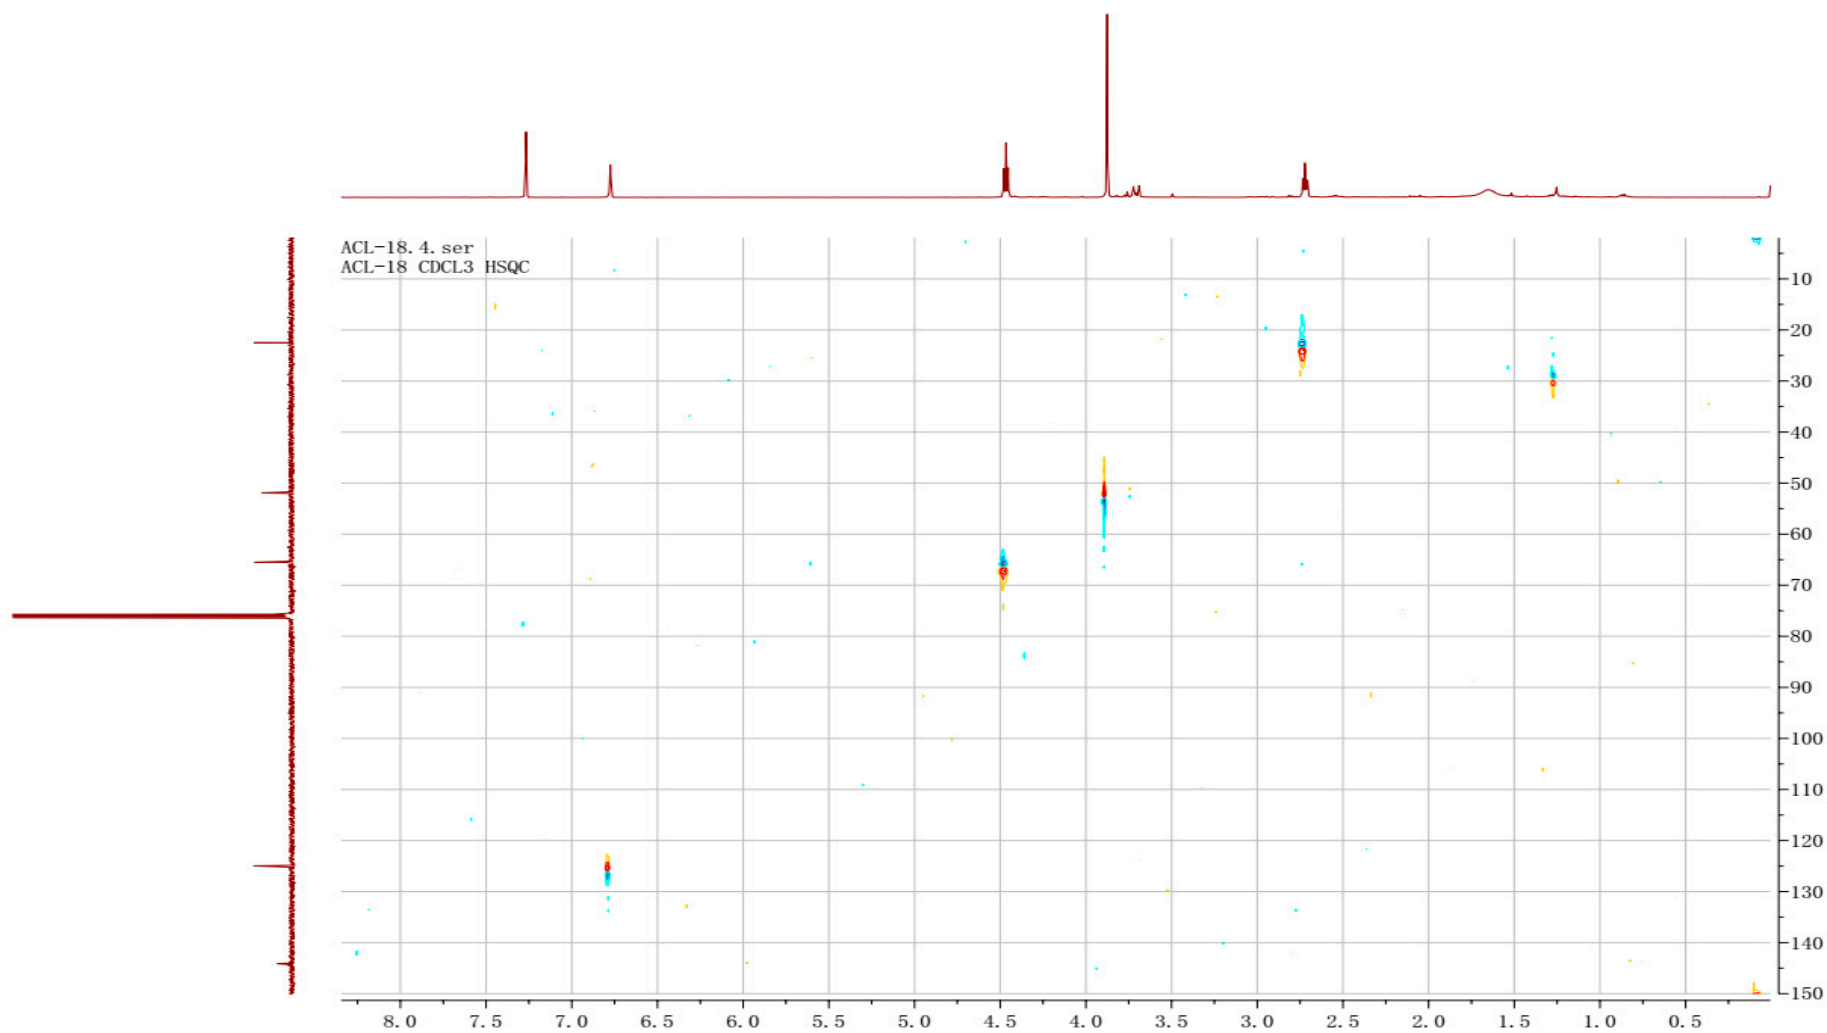

Figure S37. The  $^1\text{H}$ - $^1\text{H}$  COSY spectrum of compound 5 in  $\text{CDCl}_3$

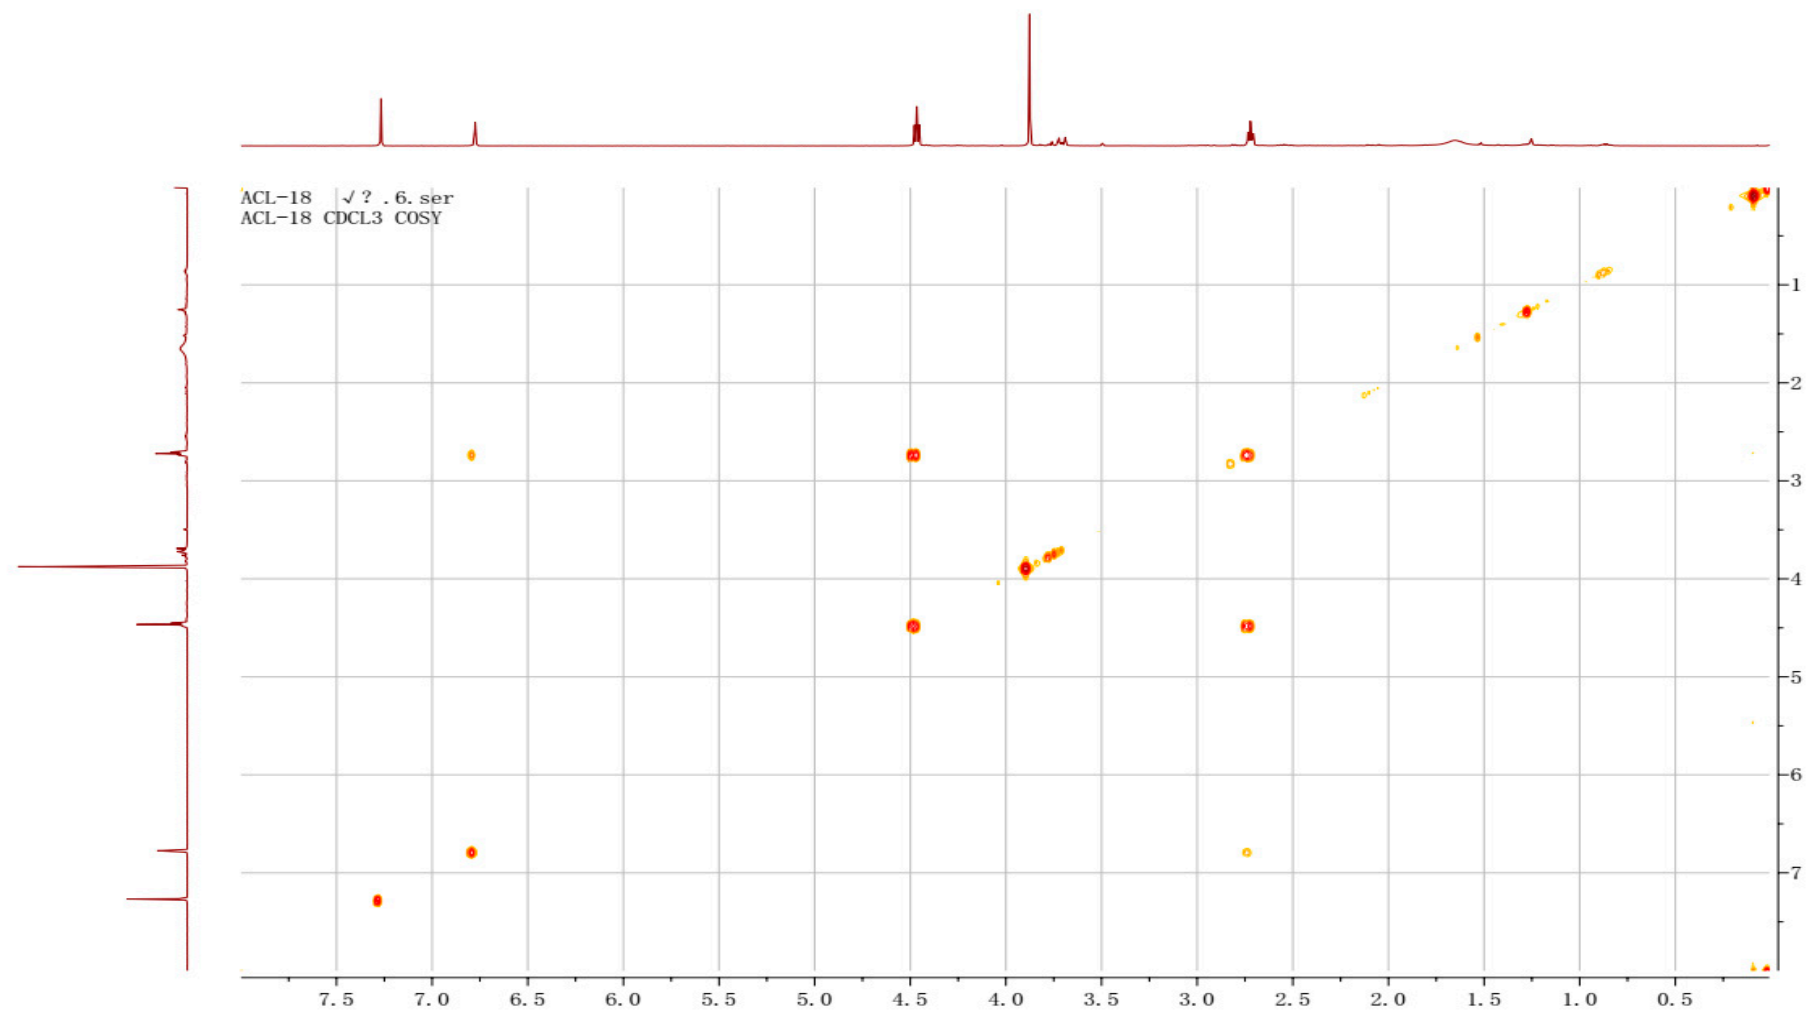

Figure S38. The HMBC spectrum of compound 5 in CDCl<sub>3</sub>

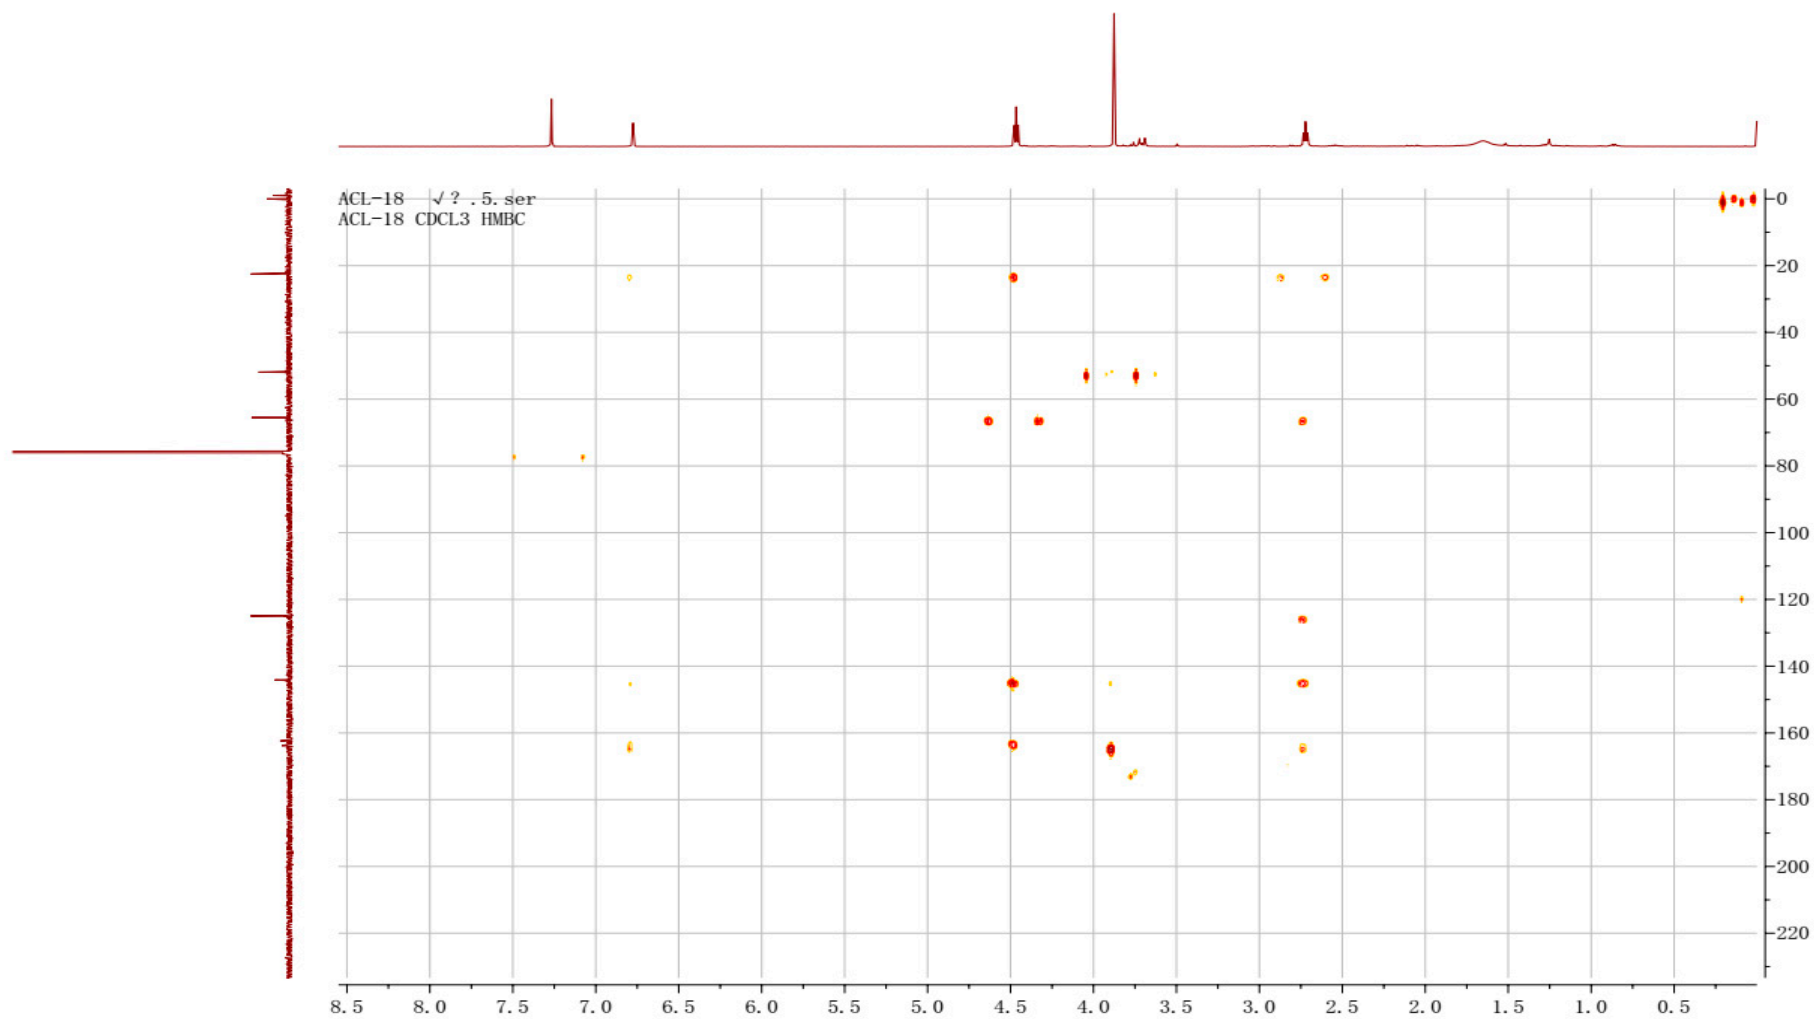

Figure S39. The HRESIMS and IR spectra of compound 5

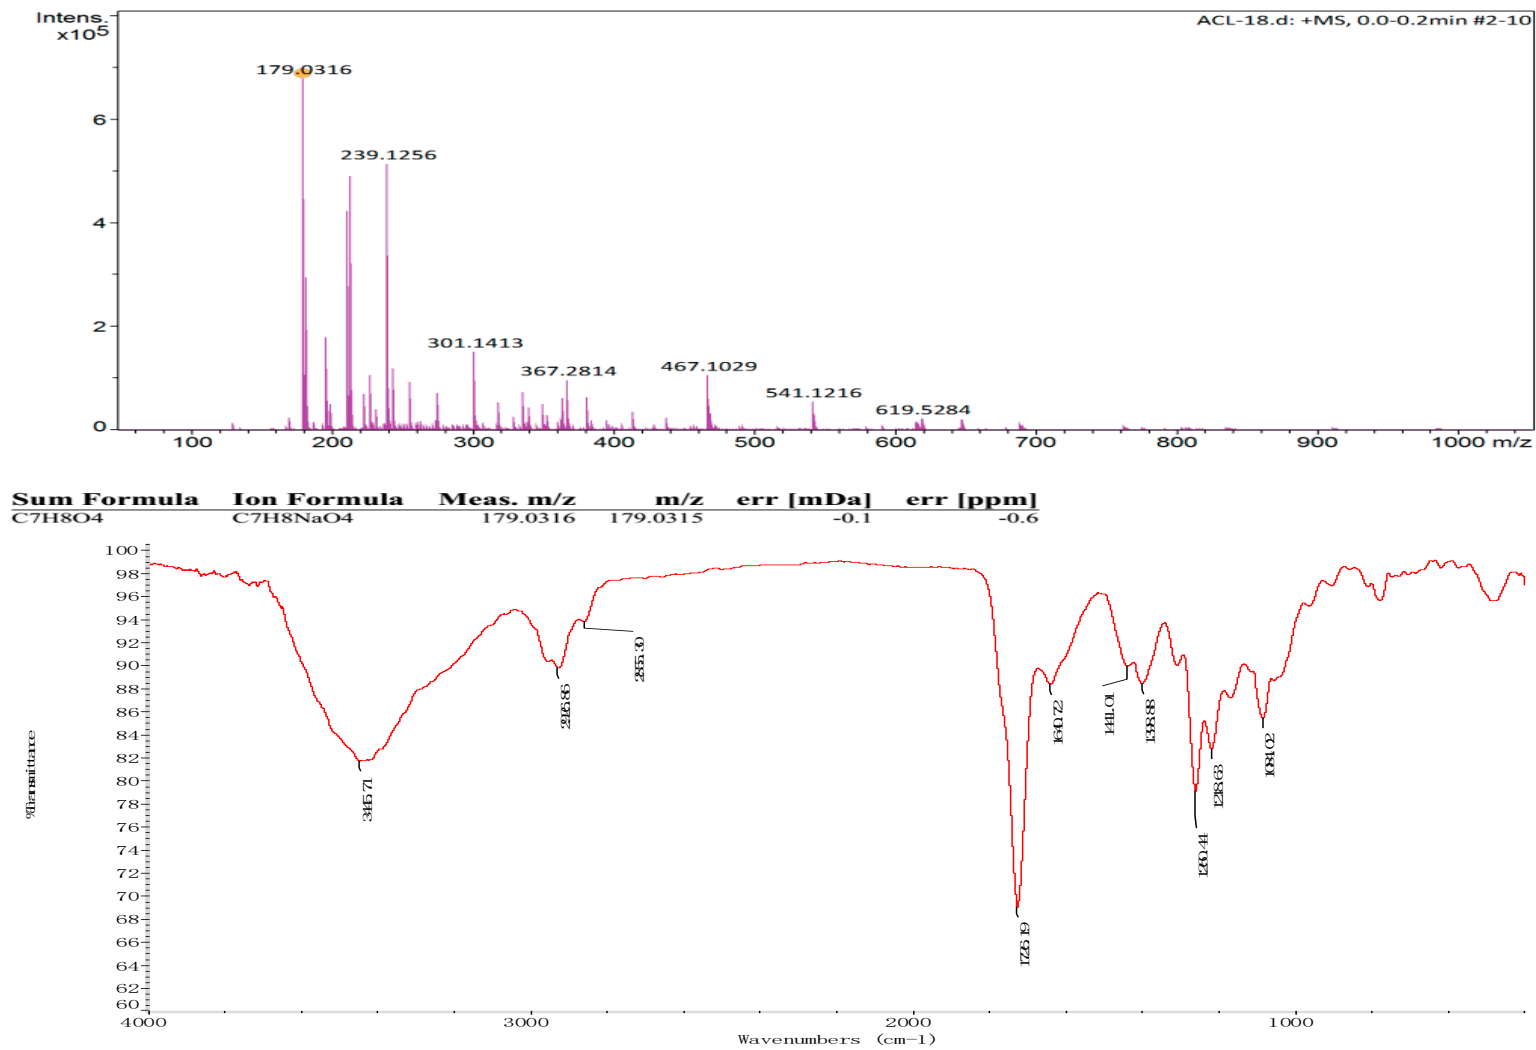

Supplement: marinedrugs-16-00468-s001.pdf [file marinedrugs-16-00468-s001.pdf]
